# Supplementary material for: Metabolome and Transcriptome Analysis Revealed the Basis of the Difference in Antioxidant Capacity in Different Tissues of Citrus reticulata ‘Ponkan’
Source: MDPI journal article supplement (doi:10.3390/antiox13020243), 2024-02-18
Supplement: s1 [file s1]

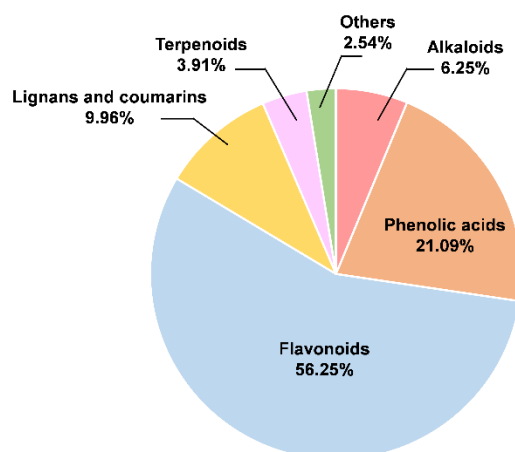

**Figure S1.** Classification and percentage of the identified secondary metabolites from 12 Ponkan tissues.

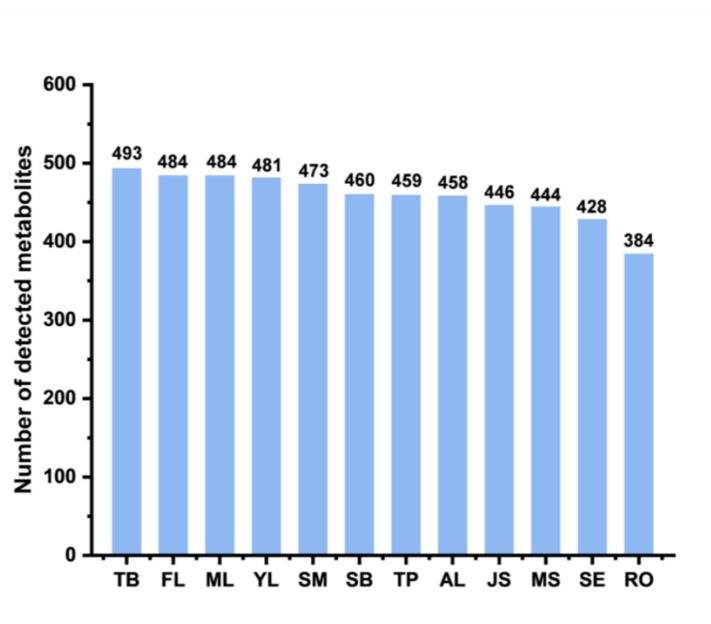

**Figure S2.** Comparison of the number of secondary metabolites detected in 12 Ponkan tissues.

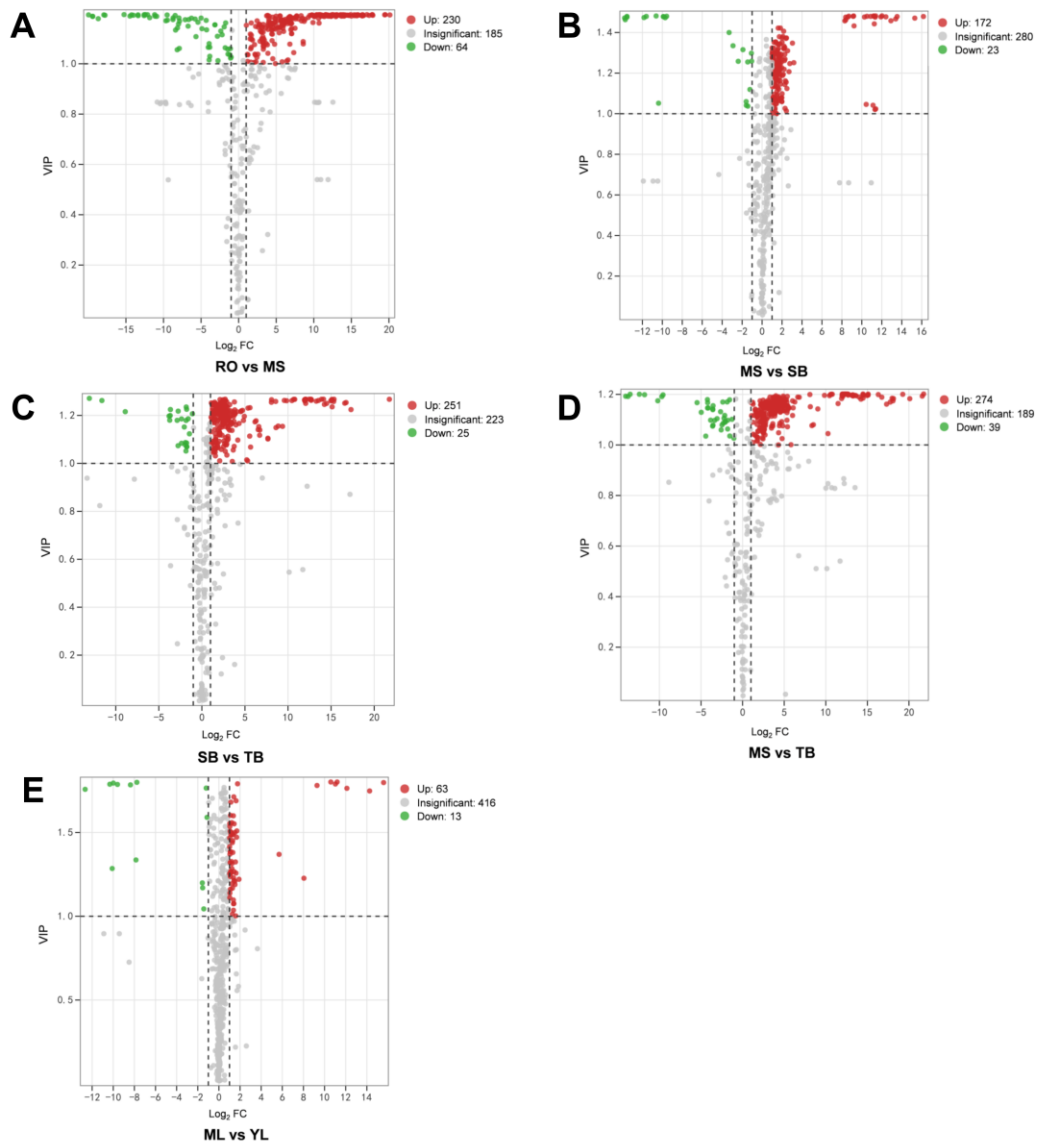

**Figure S3.** Volcano pots of the DAMs from the comparisons of RO vs MS(A), MS vs SB (B), SB vs TB (C), MS vs TB (D) and ML vs YL (E).

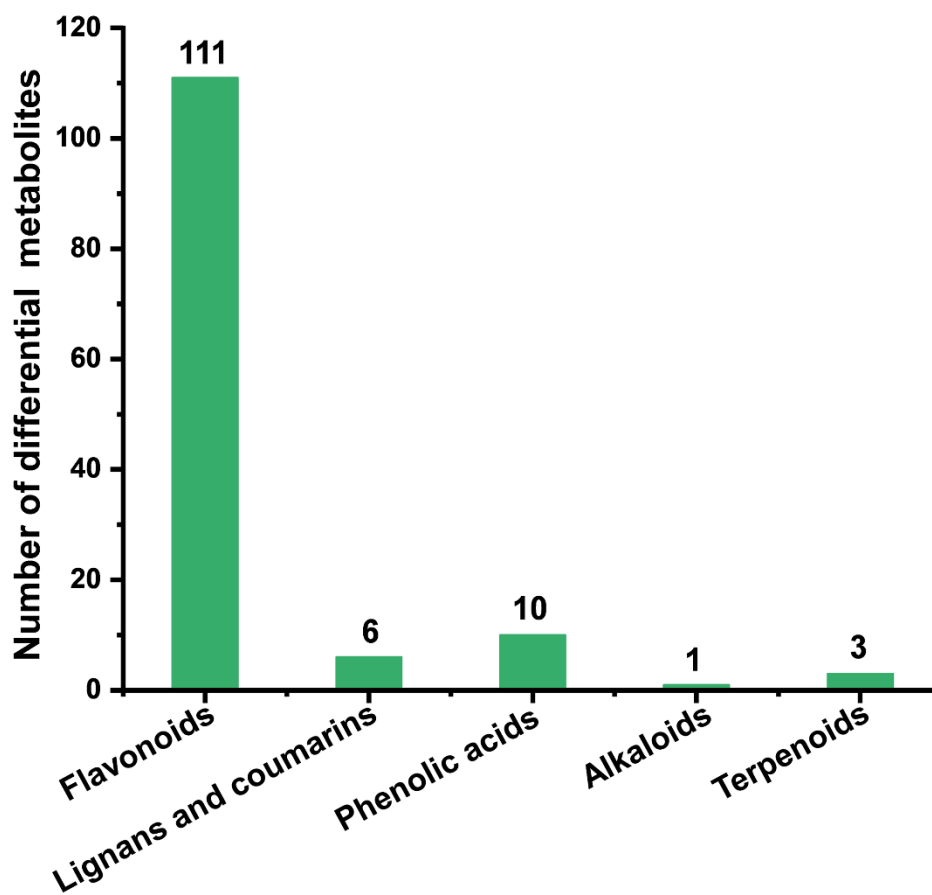

**Figure S4.** The classification of 131 common metabolites that obtained by pairwise comparison of MS, SB and TB.

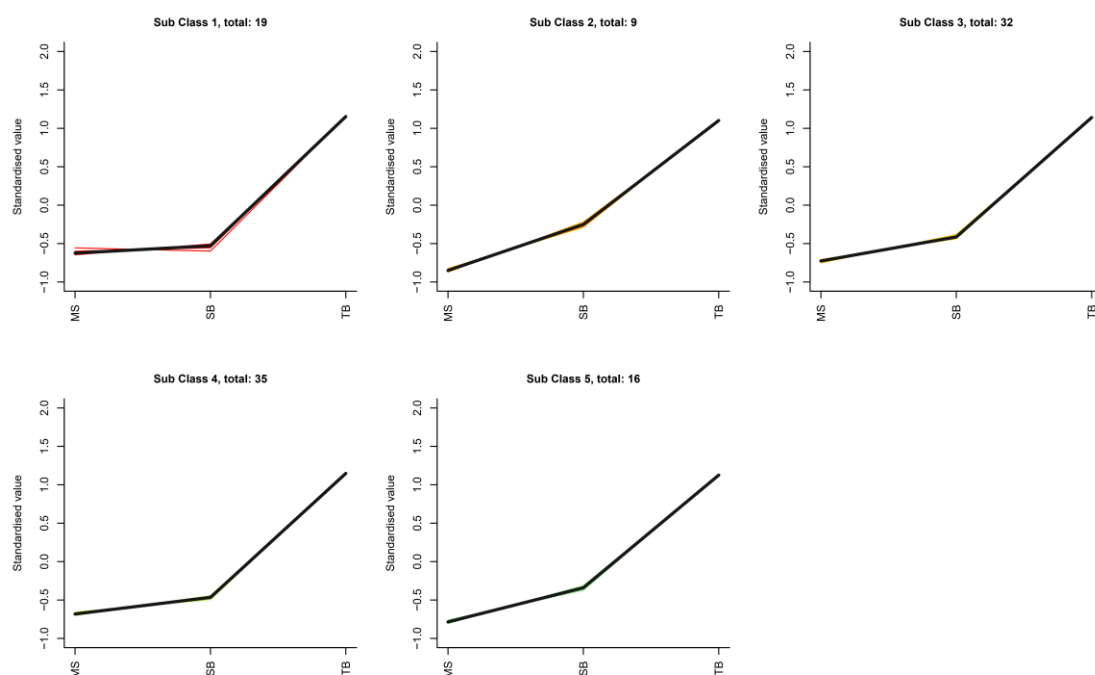

**Figure S5.** K-means clustering revealed the accumulation trend of the 111 flavonoids

in MS-SB-TB comparison.

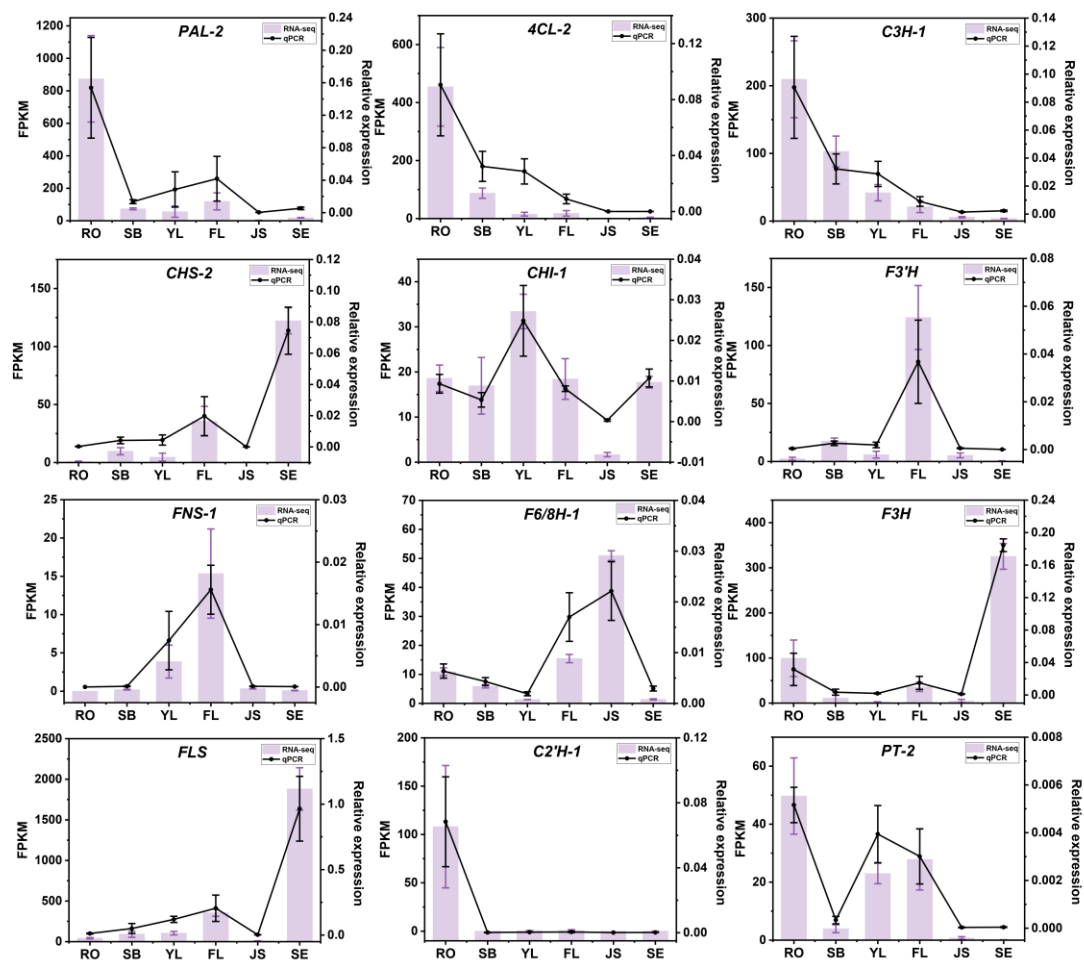

**Figure S6. RT-qPCR results for the key genes in phenylpropane pathway.**

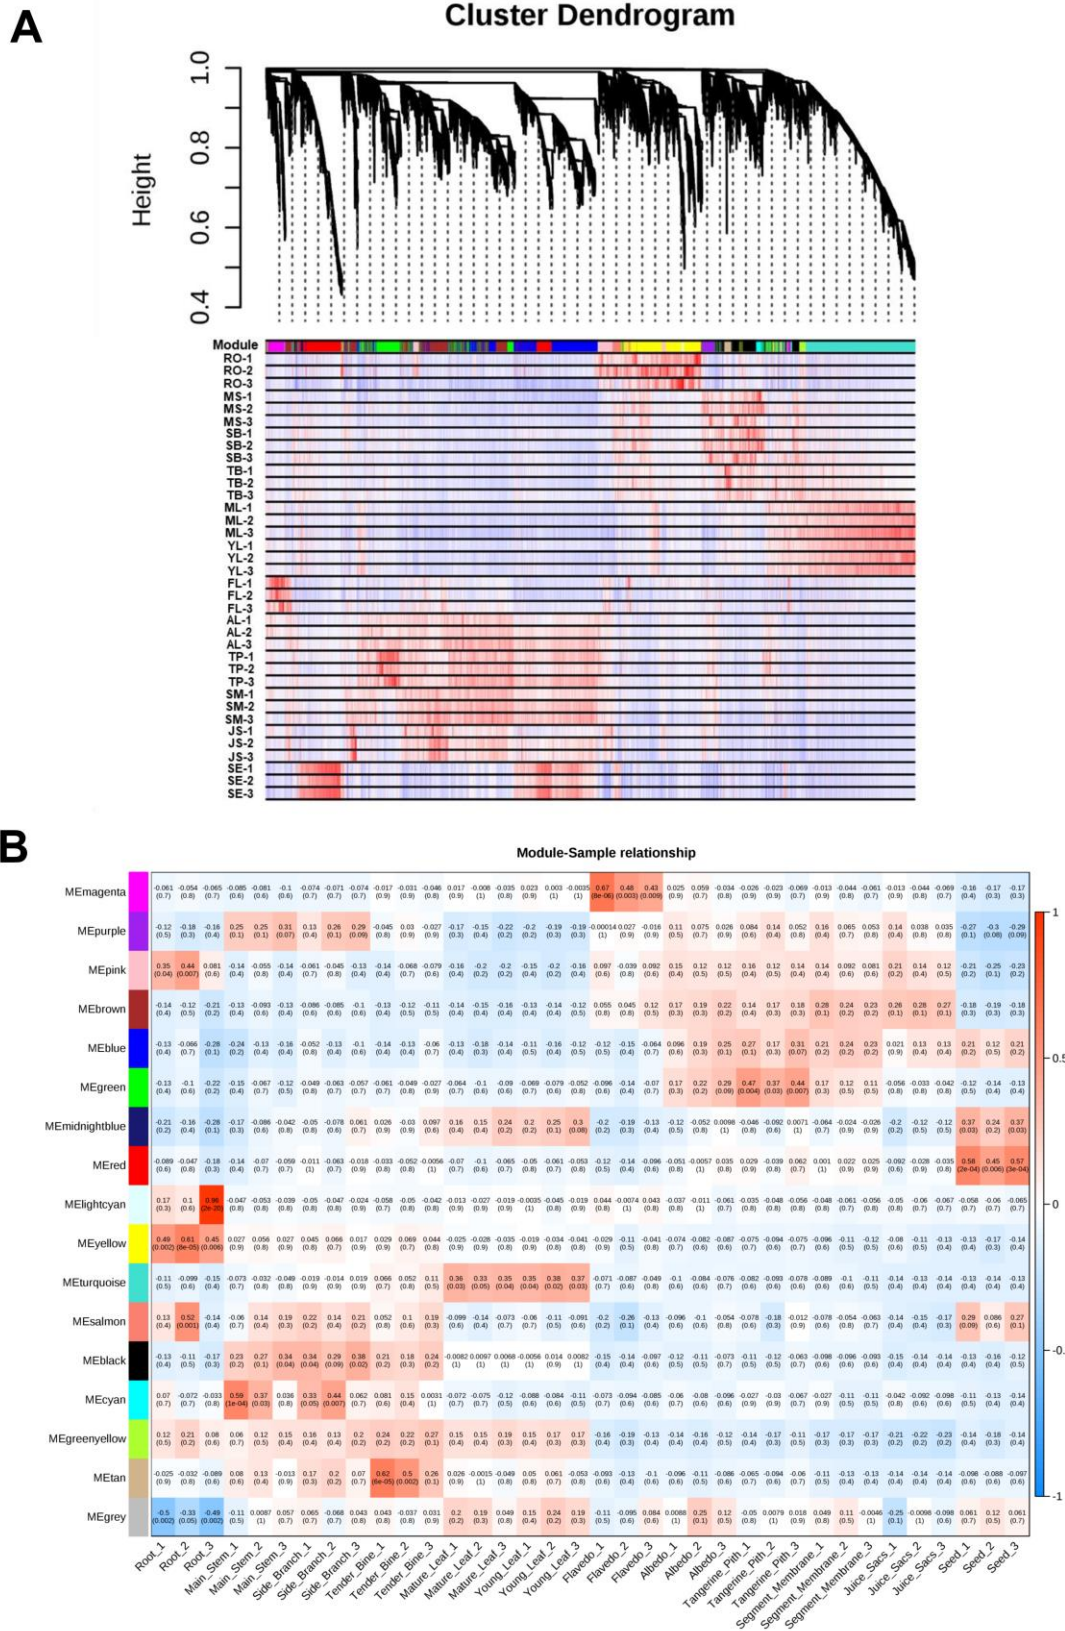

**Figure S7.** WGCNA of transcriptome data. (A) Cluster dendrogram (B) Module-samples relationships.
