# Supplementary material for: Metabolome and Transcriptome Analysis Revealed the Basis of the Difference in Antioxidant Capacity in Different Tissues of Citrus reticulata ‘Ponkan’
Source: Antioxidants (Basel). 2024 Feb 18;13(2):243. doi: 10.3390/antiox13020243 (PMC10886001; doi:10.3390/antiox13020243)
Supplement: Supplementary file 1 [file antioxidants-13-00243-s001.zip]

Archive with 6 entries (6 files):
- Supplementary Figures-proof.pdf
- Table S1-proof.xlsx
- Table S2-proof.xlsx
- Table S3-proof.xlsx
- Table S4-proof.xlsx
- Table S5-proof.xlsx
