# Supplementary material for: Metabolome and Transcriptome Analysis Revealed the Basis of the Difference in Antioxidant Capacity in Different Tissues of Citrus reticulata ‘Ponkan’
Source: Antioxidants (Basel). 2024 Feb 18;13(2):243. doi: 10.3390/antiox13020243 (PMC10886001; doi:10.3390/antiox13020243)
Supplement: Supplementary file 1 [file antioxidants-13-00243-s001.zip › Table S1-proof.xlsx]

## Sheet: Sheet1
Table S1. Information of all detected secondary metabolites in this study (including basic compound informations, classifications, CAS numbers and relative contents in all tissues). In column 'Compounds'，' * ' represent isomers that couldn't be distinguished.
Index	Q1 (Da)	Q3 (Da)	Molecular Weight (Da)	Formula	Ionization model	Compounds	Class I	Class II	CAS	Level	Root_1	Root_2	Root_3	Main_Stem_1	Main_Stem_2	Main_Stem_3	Side_Branch_1	Side_Branch_2	Side_Branch_3	Tender_Bine_1	Tender_Bine_2	Tender_Bine_3	Mature_Leaf_1	Mature_Leaf_2	Mature_Leaf_3	Young_Leaf_1	Young_Leaf_2	Young_Leaf_3	Flavedo_1	Flavedo_2	Flavedo_3	Albedo_1	Albedo_2	Albedo_3	Tangerine_Pith_1	Tangerine_Pith_2	Tangerine_Pith_3	Segment_Membrane_1	Segment_Membrane_2	Segment_Membrane_3	Juice_Sacs_1	Juice_Sacs_2	Juice_Sacs_3	Seed_1	Seed_2	Seed_3
pmp001287	120.08	103.05	119.073	C8H9N	[M+H]+	N-Benzylmethylene isomethylamine	Alkaloids	Alkaloids	-	1	4153100	22759000	22736000	812400	1338800	1113300	1113300	1735800	2270500	2268400	4234900	4304600	20916000	14933000	21582000	20885000	20444000	21861000	7907700	10502000	5890500	5944200	5744800	4360100	7818500	9983200	6658700	7440400	9140000	8474200	8837100	11833000	9248200	3584600	2538700	2226100
Lmbn002644	119.05	93.03	120.058	C8H8O	[M-H]-	4-Methylbenzaldehyde	Others	Others	104-87-0	1	1078.2	5197.7	2187.7	16128	12664	7141.5	15139	12555	11834	6696.3	15053	22418	19654	34325	18278	27316	29935	31663	9	8927.3	8603.2	12832	11828	16097	6638.2	7531.7	16323	3759.1	1661.2	2792.1	1524.5	4635.8	2767.2	9	9	9
mws0628	121.03	92	122.037	C7H6O2	[M-H]-	4-Hydroxybenzaldehyde	Phenolic acids	Phenolic acids	123-08-0	3	116740	128160	181780	109570	83370	72994	112850	106660	133650	446160	200510	238600	441920	252490	294160	238680	292240	242770	201570	173020	157190	145410	113690	103270	137730	90117	103940	263170	164170	494210	150020	141320	155140	104200	104200	222520
MWS20172	127.04	53.04	126.032	C6H6O3	[M+H]+	5-hydroxymethylfurfural	Others	Others	67-47-0	2	9	9	9	9	52579	9	9	9	9	136460	130370	142340	284450	271060	312870	264620	262670	302220	196550	194860	245530	199780	135380	182420	9	9	9	222550	218460	239410	202020	237460	212310	9	9	9
Zmdp000376	130.09	84.08	129.09	C5H11N3O	[M+H]+	4-Guanidinobutanal	Others	Others	-	1	262300	413350	707600	312960	360270	420730	243930	334110	467750	310970	302510	401080	337780	331010	364680	388650	434480	412090	853460	904230	929970	678250	743570	478100	625820	674050	531390	976250	1356800	1169400	1244700	1452600	1209600	508190	690350	512540
pmp001198	132.1	57.1	131.095	C6H13NO2	[M+H]+	6-Deoxyfagomine	Alkaloids	Piperidine alkaloids	197449-09-5	1	1137500	6691400	7283200	619100	918770	1063400	631340	1079300	1977700	1339000	1104400	2328100	2851000	2223900	3521400	1875000	2021200	3061800	1249800	2008000	1674600	1658800	2496400	1860700	3159300	4452400	2750400	2272000	3041300	2768100	2995700	4130300	4174500	1658800	1432800	1430500
HJKP000649	136.07	91.05	135.068	C8H9NO	[M+H]+	N-benzylformamide	Alkaloids	Alkaloids	6343-54-0	2	1021100	13770000	12368000	1205300	3438400	5710500	1795400	4250700	5988500	4573900	7156600	8207200	9	9	9	9	9	9	3421900	3349400	3519100	2154800	2199700	1727200	1865200	1676100	1403700	1373000	1032900	735770	183980	179240	967020	716390	690910	589220
mws1336	138.06	120	137.048	C7H7NO2	[M+H]+	4-Aminobenzoic Acid	Phenolic acids	Phenolic acids	150-13-0	3	410850	55402	75467	64034	74326	16775	51547	27668	10547	172700	83287	77304	216540	119060	159210	282280	112420	116440	45801	57236	76446	39410	20085	42985	34345	25487	50270	53529	66694	95450	118970	111660	174920	1776600	1681600	1921600
Lmgn001670	137.03	93.04	138.032	C7H6O3	[M-H]-	Salicylic acid	Phenolic acids	Phenolic acids	69-72-7	3	123030	68575	201020	163670	127700	64499	105450	137860	137130	102300	51455	109070	167910	77235	92900	107550	76595	68954	178050	89716	117180	350180	342900	430210	336830	353320	365020	329030	338790	252910	209880	116020	101140	525570	83976	97674
pme2828	140	99	139.027	C6H5NO3	[M+H]+	4-Nitrophenol	Phenolic acids	Phenolic acids	100-02-7	3	2840900	2623900	2622100	2828300	2486800	2862200	2115100	2472200	2649400	2812000	2683500	2546800	2547500	2634700	2549900	2776000	2754900	2940300	2611400	3535100	3018600	2607100	2888000	2874200	2817400	2965100	3232000	2828400	2979600	2806800	3048000	2860900	2622000	2809100	2874500	3106800
Lmcp000611	144.08	84.06	143.069	C5H9N3O2	[M+H]+	2-Amino-4,5-dihydro-1H-imidazole-4-acetic acid	Alkaloids	Alkaloids	69098-41-5	2	20636000	14003000	13369000	13764000	10759000	10183000	17256000	13392000	14017000	19057000	16509000	15104000	20286000	14811000	15478000	18942000	15526000	16459000	19610000	23126000	20338000	16965000	14321000	11994000	13586000	14906000	12095000	23137000	24268000	21848000	24329000	27867000	24894000	20133000	23727000	17569000
mws0458	151.04	136	152.047	C8H8O3	[M-H]-	Vanillin*	Phenolic acids	Phenolic acids	121-33-5	3	198130	228180	225720	244520	286330	216990	252420	279160	285740	360490	195480	233160	258270	164410	186560	208260	146770	191910	94866	123770	100440	503970	390240	432830	209820	225390	214600	145880	144070	240330	212980	202670	151660	107010	120770	102230
MWSmce040	153.05	65.04	152.15	C8H8O3	[M+H]+	Isovanillin*	Phenolic acids	Phenolic acids	621-59-0	3	144280	185900	128580	138090	206280	136170	143650	165580	157350	255120	136880	176970	189540	114180	98215	100660	93831	114500	73199	84761	42985	321850	233480	298420	206620	185180	160210	87796	68676	119310	84198	108440	71346	106580	111010	93052
MWSmce429	153.05	107.05	152.15	C8H8O3	[M+H]+	2,6-Dihydroxyacetophenone	Phenolic acids	Phenolic acids	699-83-2	3	106010	114830	93054	118470	167170	242150	91176	132320	140190	97315	133990	84715	106790	90119	105900	116780	108960	101650	102720	83663	124270	158080	124830	116640	100580	115720	100150	116860	132670	128890	116230	126690	114830	102960	112440	108670
mws0183	153.02	109.03	154.027	C7H6O4	[M-H]-	3,4-Dihydroxybenzoic Acid (Protocatechuic acid)	Phenolic acids	Phenolic acids	99-50-3	3	54674	69062	103450	145510	72149	112710	145920	134920	60256	96739	139570	145520	93409	171260	176690	139110	120240	90986	85321	81398	47928	38093	96695	81489	112140	117850	105210	140400	139430	169140	98810	95652	65059	624090	126360	151300
Hmqn002118	161.02	133.03	162.032	C9H6O3	[M-H]-	7-Hydroxycoumarin	Lignans and Coumarins	Lignans	93-35-6	3	348750	175260	1102300	27413	13010	58088	9	9	9	1696800	815850	136100	66300	120690	96763	163920	324200	153350	1619300	800500	372540	623720	1319300	771660	261640	284050	215460	241950	135380	155050	76379	67051	21333	11628	4653.5	4120
pmf0440	163.08	91.1	162.068	C10H10O2	[M+H]+	4-Methoxycinnamaldehyde	Phenolic acids	Phenolic acids	1963-36-6	3	223150	268570	261670	224380	270750	230050	186780	210280	201370	244450	239500	218020	227320	265110	272020	249630	289960	229450	246600	234350	219630	309740	293150	317460	258300	288390	306440	297890	338360	303460	245570	231940	179680	234340	228720	274810
Lmqp008175	163.08	103.05	162.068	C10H10O2	[M+H]+	Methyl cinnamate	Phenolic acids	Phenolic acids	103-26-4	3	257650	64980	298990	37086	61188	48769	9	37601	62014	9	9	9	9	9	9774.7	9	9	9	193950	171800	545350	260050	629770	243590	1439900	414110	400510	196850	136140	191070	39412	41157	27557	15354	16121	12860
Lmbn002648	163.04	119.05	164.047	C9H8O3	[M-H]-	α-Hydroxycinnamic acid	Phenolic acids	Phenolic acids	5801-57-0	1	347050	290170	415280	9	9	9	9	23550	13838	36758	49053	46221	9	9	9	9	9	9	78145	62640	102630	81814	20638	120340	86179	96476	59032	99120	91289	110620	9	9	9	25778000	21207000	20675000
Lmrn003000	165.06	103.06	166.063	C9H10O3	[M-H]-	2-Hydroxy-3-phenylpropanoic acid	Phenolic acids	Phenolic acids	7326-19-4	2	3561.8	1755.8	1754.3	3528.5	4750.3	4135.9	7809.1	17768	4214.1	185220	105870	45718	809380	813240	1191700	688620	1381100	1162900	704590	489380	713320	150460	159200	129220	79632	80229	80246	71025	114210	91027	173260	289590	274000	12330	22850	8779.7
MWS1830	167.07	121.03	166.063	C9H10O3	[M+H]+	Ethylsalicylate	Phenolic acids	Phenolic acids	118-61-6	2	15956	10027	28134	29213	38532	12199	34858	104940	56828	56154	204680	148680	75340	166600	116380	125030	126880	160280	9	9	9	9	9	9	9	9	9	9	9	9	9	9	9	9	9	9
Lmbn005172	165.06	119.05	166.063	C9H10O3	[M-H]-	2,6-Dimethoxybenzaldehyde	Phenolic acids	Phenolic acids	3392-97-0	2	5746.9	11452	25889	27221	36919	16946	26724	29653	24714	157550	210640	95866	664460	1034200	883960	603930	1437000	906570	703310	580580	604910	166570	137080	151100	61287	112410	83403	48305	84338	126730	207640	302990	199310	10114	17267	6520.3
MWStz147	168.1	135.07	167.21	C9H13NO2	[M+H]+	Synephrine	Alkaloids	Phenolamine	-	2	9	9	9	10616000	15789000	4425500	24084000	38647000	44492000	58960000	65460000	54342000	57136000	124670000	73536000	71308000	31477000	57104000	62249000	52440000	57220000	60018000	64972000	32702000	64237000	61876000	61897000	55717000	52685000	55008000	39428000	35687000	51627000	9	9	9
Hmbp001276	169.05	65.03	168.042	C8H8O4	[M+H]+	Gallacetophenone	Phenolic acids	Phenolic acids	528-21-2	1	94650	52734	48613	172500	325560	203760	164250	404180	429850	1300400	1084100	674810	634210	479540	718350	823010	543460	588140	1227600	980360	1075500	7810100	9783100	9827800	6466800	8421700	7645000	8534400	6698200	6159700	1684500	2555600	2433000	2749600	4074000	2963800
Hmtp000827	169.05	67.05	168.043	C8H8O4	[M+H]+	Griffonilide	Others	Others	61371-55-9	2	73895	111460	87366	75511	43490	56327	102580	77752	99116	83804	113290	135830	148520	134620	151230	151390	199740	155140	415990	398040	534980	399380	490300	447990	353960	422500	418360	118470	143560	173500	117490	149070	160940	229240	228330	122460
MWSslk066	169.05	65.04	168.15	C8H8O4	[M+H]+	Isovanillic acid	Phenolic acids	Phenolic acids	645-08-9	3	1786600	2107500	1152400	1659600	2907600	1416800	2008800	2885900	1760400	609250	2485100	1568800	419170	1045000	994580	322830	630330	751710	16145	9	24857	304620	301860	297360	888150	752450	731680	294520	150780	160610	48646	52130	90988	285350	220910	187210
Xmbp001692	171.03	81.03	170.022	C7H6O5	[M+H]+	2,4,6-Trihydroxybenzoic acid	Phenolic acids	Phenolic acids	83-30-7	2	9	9	9	279240	343330	204810	207190	175130	210430	9	159700	177820	51372	9	9	9	9	9	9	9	9	260020	199880	126550	279330	250010	275280	132140	118860	137990	66429	50913	59002	9	9	9
mws1075	177.05	121	176.047	C10H8O3	[M+H]+	7-Methoxycoumarin	Lignans and Coumarins	Coumarins	531-59-9	2	2406500	265590	8651900	9	9	9	9	9	9	9	9	9	9	9	9	57205	7223.5	55026	16027	31746	45057	9	9	9	127480	17864	61565	23653	6252.2	27891	9	9	9	9	9	9
mws1195	179.07	147.1	178.063	C10H10O3	[M+H]+	p-Coumaric acid methyl ester	Phenolic acids	Phenolic acids	3943-97-3	3	114480	177300	235260	9	9	9	9	9	9	184520	53640	81836	211140	135350	178190	323800	184560	184460	317330	176820	474220	185050	226230	231880	145030	141470	95111	43861	21202	20440	9	9	9	87629	88502	61760
mws2212	179.03	135.05	180.042	C9H8O4	[M-H]-	Caffeic acid	Phenolic acids	Phenolic acids	331-39-5	1	85724	41098	159820	9	9	9	11882	33021	163140	198080	86328	56332	84895	59993	46071	87886	85238	75393	410120	198410	171590	699360	802270	872960	629420	648420	513380	313960	351410	269750	287390	211590	85612	206530	102550	32622
mws0093	179.07	146	180.079	C10H12O3	[M-H]-	Coniferyl alcohol	Phenolic acids	Phenolic acids	458-35-5	3	11719	10568	9927.3	160670	485000	57804	175190	508070	107120	254330	154640	234020	11648	6951.1	2902.3	52003	11095	4662.8	597200	324060	822140	634660	1255000	701730	712950	640810	549510	336950	183340	198550	217140	67603	57649	1781.4	6427.5	584.23
MWStz070	182.08	91.05	181.074	C9H11NO3	[M+H]+	N-(2-Hydroxy-4-methoxyphenyl)acetamide	Alkaloids	Phenolamine	58469-06-0	2	7193000	34513000	32757000	5792700	21727000	34478000	8037200	24184000	31057000	2258000	9924600	19993000	13928000	9637200	6621700	5441600	5786900	4586600	8863900	11451000	11586000	3819400	4155200	1880600	4439100	5226500	2968400	3709200	4041700	3817300	5499000	7190200	5555100	4271600	3741600	3258900
Hmgp002327	188.07	118.06	187.063	C11H9O2N	[M+H]+	3-amino-2-naphthoic acid	Alkaloids	Alkaloids	-	1	1881400	15989000	14166000	4781700	6413300	5568900	5263900	7865500	7170100	3048700	6529200	8645900	10494000	7686400	11623000	9187800	8925800	10749000	10389000	10182000	10731000	3216400	5010000	3191500	5692900	10967000	8638900	3888300	3807900	3067100	563570	1245300	685350	1407600	2729400	1499400
Lmlp002994	190.09	175.06	189.079	C11H11NO2	[M+H]+	5-Hydroxyquinoline	Alkaloids	Quinoline alkaloids	578-67-6	2	51660000	38944000	22291000	271350	90687	94945	25216	48039	13872	10586	12412	15183	11439	151340	12144	9	9	9	9	9	9	9	9	9	13445	9356.3	5843.6	22649	2794.1	9113.9	9	9	9	11222	3850.4	4120.4
ML10198935	191.12	160.08	190.111	C11H14N2O	[M+H]+	3-(2-(Methylamino)ethyl)-1H-indol-5-ol	Alkaloids	Plumerane	1134-01-6	2	231050	205340	6817600	34906	17929	21527	15706	37701	406630	87942	116410	59485	150140	1679700	522500	345270	1525800	446430	28640	179030	129180	92881	80639	52458	250930	47144	115630	134510	48394	1744100	22535	41925	16052	26170000	28312000	30385000
Hmcp002123	193.05	178.02	192.042	C10H8O4	[M+H]+	Isoscopoletin (6-Hydroxy-7-Methoxycoumarin)*	Lignans and Coumarins	Coumarins	776-86-3	3	2607800	419450	13828000	110780	28857	284980	83877	20309	83023	9	11532	14377	9	9	14061	19901	9	24216	532420	417050	146430	85460	41396	40078	133050	16478	82222	9	9	42177	10156	9	7813.1	9	5295	9
MWSCX014	193.05	133.03	192.042	C10H8O4	[M+H]+	Scopoletin (7-Hydroxy-6-methoxycoumarin)*	Lignans and Coumarins	Coumarins	92-61-5	3	1736600	856750	3519800	9	9	9	9	9	9	163740	304330	474220	295400	307290	470440	252070	266780	352770	283570	289830	574520	182160	102370	149160	267160	162720	219820	112940	123230	131460	129720	149410	172820	43957	123970	9
Lmmp002080	193.13	105.03	192.126	C11H16N2O	[M+H]+	N-(4-Aminobutyl)benzamide	Alkaloids	Alkaloids	5692-23-9	2	53117	27975	9	241640	33383	186650	213300	9	63622	9	9	9	18566	9	9	9	9	9	21481	22504	9	47013	45733	33784	143140	64675	66446	433750	456870	710580	1674400	1642100	2331900	46961	56826	61471
Lmdn003756	193.05	135.05	194.058	C10H10O4	[M-H]-	Methyl caffeate	Phenolic acids	Phenolic acids	3843-74-1	3	214640	66476	79816	151310	68332	188490	107910	77833	753570	20223	22908	39016	10767	12712	7823.9	12929	4907.1	15313	30760	23443	19202	382340	387660	292740	1113100	713970	528410	2350000	2063300	3137500	6653500	5265500	5298100	18599	138770	26337
mws0014	193.05	134.01	194.058	C10H10O4	[M-H]-	Ferulic acid*	Phenolic acids	Phenolic acids	537-98-4	1	75126	49890	131470	94931	103300	98014	103390	105060	65767	158460	102610	65771	175570	110140	110730	142840	112520	114500	967180	417410	378140	692670	605660	699300	1014700	654370	871920	415510	573260	289270	688990	304010	208350	717520	92732	109730
pme0422	193.06	134	194.058	C10H10O4	[M-H]-	Isoferulic Acid*	Phenolic acids	Phenolic acids	537-73-5	1	104390	51190	113120	121370	136690	97795	102310	100150	123120	181420	132970	141540	173290	131370	128430	218610	146940	145520	1109700	613790	514550	751650	597910	870740	1028600	827050	768660	493750	631490	335530	776390	389420	226450	859320	151170	112600
pmp000513	200.07	185.05	199.063	C12H9NO2	[M+H]+	Dictamnine	Alkaloids	Quinoline alkaloids	484-29-7	3	162970	88920	140520	58024	818920	55627	239680	690220	63283	172090	683160	337690	540350	1302800	645960	382220	1201400	487110	192050	42548	68273	14127	10878	3673.2	9	9	9	9	9	9	9	9	9	9	9	9
Zmbp002538	205.1	146.06	204.09	C11H12N2O2	[M+H]+	1-Methoxy-indole-3-acetamide	Alkaloids	Plumerane	-	2	1007600	9260000	8406200	2783900	3948700	3119800	2972600	4521900	4285100	1668900	3604200	4741700	5824400	4442800	6863300	5552800	5308900	6173000	5896400	5561300	6109500	1671300	2520300	1862300	3236900	6190100	4793700	2243200	2125200	1564500	262740	701730	408150	772150	1591500	839730
Cmqp003383	206.08	146.06	205.074	C11H11NO3	[M+H]+	Gentianamine	Alkaloids	Pyridine alkaloids	22952-54-1	2	138770	337310	193290	404990	582470	540550	300690	463870	400140	304740	300850	335110	100450	148110	161330	67800	122770	169130	80357	116870	82955	110430	120840	63605	130970	182580	167320	93151	100380	104040	53507	66325	56240	103340	106560	73615
pmp001236	207.07	121.1	206.058	C11H10O4	[M+H]+	Clove chromone	Others	Others	-	2	87173	111830	410920	9	9	9	9	9	9	9	9	9	9	9	9	9	9	9	1219600	2128900	987330	47366	93652	20960	52696	73596	30058	127630	283960	60962	49685	80224	11379	11914	26215	5678.7
mws4173	207.07	192.04	206.058	C11H10O4	[M+H]+	5,7-Dimethoxycoumarin (Limettin)(Citropten)	Lignans and Coumarins	Coumarins	487-06-9	2	9	9	9	9	9	9	9	9	9	17221	5702.4	14851	9	9	9	9	9	9	1885700	3748700	1548600	74396	141390	41485	96063	119590	49151	250340	458930	109230	65543	146530	19024	16655	31818	11583
Lmln010063	205.16	189.13	206.167	C14H22O	[M-H]-	2,6-Di-tert-butylphenol	Phenolic acids	Phenolic acids	128-39-2	1	836820	733390	627600	1346500	1556300	1580300	1261500	1266800	1372300	853580	1204800	1317000	1084600	1202400	1185700	969170	964250	1222900	793360	758990	797770	1532500	1527300	1442600	1179900	1378800	1314500	1465500	1537400	1362300	1094600	1268900	1011000	1278000	1089800	1151400
MWSmce083	207.07	133.03	208.074	C11H12O4	[M-H]-	Ferulic acid methyl ester	Phenolic acids	Phenolic acids	2309-07-1	3	137280	107620	146040	76994	68101	68206	98621	86732	101100	678210	240200	269260	805010	366540	639130	1422000	537910	638670	797690	422650	825760	1073400	1217300	1454100	545600	1391400	1916800	131180	112340	102270	39478	74434	46025	125450	53876	70767
mws0853	209.08	179	210.089	C11H14O4	[M-H]-	Sinapyl alcohol	Phenolic acids	Phenolic acids	537-33-7	3	106460	59635	147430	85015	149360	51731	10358	151110	20349	39527	44176	16781	9	12215	9	129440	23712	9	1316600	1340200	1863900	364610	667240	478070	195010	305150	239380	263300	435450	338320	437920	486240	356090	9	9	9
Lmbn004790	209.08	179.03	210.089	C11H14O4	[M-H]-	Methyl 3-(3-hydroxy-4-methoxyphenyl)propanoate	Phenolic acids	Phenolic acids	129150-61-4	3	88719	9	143830	70195	152230	27195	13932	99016	27186	45454	55808	10941	11516	12796	5244.9	153130	25363	9	1063200	1231800	1883500	376630	653440	398960	205470	279960	261530	358890	389180	309380	448290	384840	295360	9	9	9
pmp001096	216.07	201	215.058	C12H9NO3	[M+H]+	Dictangustine A	Alkaloids	Quinoline alkaloids	-	3	9	9	9	9	9	9	6607.5	18526	8026.5	8277.4	51448	54544	19844	62704	38335	15498	48124	27339	27546	6140.7	17893	3979.8	3157.2	1778.7	9	9	9	9	9	9	9	9	9	9	9	9
MWSmce042	217.04	202.03	216.19	C12H8O4	[M+H]+	Bergapten	Lignans and Coumarins	Coumarins	484-20-8	3	2248500	710500	2910800	13508	11482	17517	9	9	9	9887.1	5867.7	4747.4	16647	2959.7	2280.6	6741.8	6378.7	2247.6	32702	20141	15532	81832	12627	7443	529000	14773	10111	1447300	561910	105710	413350	207050	52433	56700	34946	45115
Hmyp002656	222.08	130.06	221.068	C11H11NO4	[M+H]+	Methyl dioxindole-3-acetate	Alkaloids	Plumerane	57061-18-4	2	46057	39333	33991	32655	49847	27305	62205	54999	41490	100230	113300	93874	374440	386720	319560	525130	316510	358050	81283	133160	131970	319070	369500	372930	412070	600560	584310	91465	151060	102790	24167	41865	38685	219890	252190	140700
Smbp006069	223.05	190.02	222.053	C11H10O5	[M+H]+	5,7-dimethoxy-8-hydroxycoumarin	Lignans and Coumarins	Lignans	-	2	7171900	1092700	10734000	9	9	9	4074.1	9	64768	9	93305	30210	9	9	9	152550	15671	362630	9	3145.6	19950	11253	4963.7	29314	779330	1352.5	276360	6709.6	4944.3	390330	9	9	9	896.7	11183	2229.3
MWS20178	223.06	190.03	222.053	C11H10O5	[M+H]+	isofraxidin	Lignans and Coumarins	Coumarins	486-21-5	2	7392100	967760	10707000	9	9	9	4905.4	9	67611	6740.4	80276	16187	9	4974.9	5419.8	149120	16812	372100	7529.8	4978.3	11437	7345.4	2980.4	35690	732560	4909.9	336320	9805.9	9	328520	9	9	9	1025.1	9908.6	1050.1
Zmln002252	223.03	149.03	224.032	C10H8O6	[M-H]-	Sideretin (5,7,8-Trihydroxy-6-methoxycoumarin)	Lignans and Coumarins	Coumarins	-	2	23928	30553	31632	36936	36713	56172	26806	30230	29310	18062	19262	28288	16881	7118.9	14922	12330	14362	13867	334980	216590	204250	249680	292820	147600	235080	323010	341430	142970	129790	78963	114310	55634	53562	275610	54765	28884
mws4085	223.06	193	224.068	C11H12O5	[M-H]-	Sinapic acid	Phenolic acids	Phenolic acids	530-59-6	1	36111	16715	39759	32306	31539	32826	29057	13039	28458	19564	16445	18964	13710	5928.6	16010	13561	9519	7706.1	349580	224440	195610	324900	312390	179020	275040	407230	382840	175460	173170	121520	133370	86547	41498	388210	74692	40313
Cmsp002787	227.09	181.05	226.084	C11H14O5	[M+H]+	3,4'-Dihydroxy-3',5'-dimethoxypropiophenone	Phenolic acids	Phenolic acids	136196-47-9	2	19096	34543	37508	446590	1258000	962240	636470	1165600	999510	2153600	2170500	1734800	249780	197450	191110	149730	182790	252950	20532	12763	18697	90332	60381	67047	349990	396950	507400	79062	45996	55587	17293	26008	35598	194570	307770	204620
Lmdp002381	227.09	149.06	226.084	C11H14O5	[M+H]+	Genipin	Terpenoids	Monoterpenoids	6902-77-8	2	9	9	9	23523	31493	27327	23523	52829	27983	27283	53595	55284	31243	52406	73346	87485	53905	59491	50298	16467	46536	26470	36105	35513	25773	22509	43372	22980	25375	12013	25895	16011	19477	9	9	9
Zmnn007376	227.07	93.03	228.079	C14H12O3	[M-H]-	Xanthyletin	Lignans and Coumarins	Coumarins	553-19-5	3	9	1617	539.86	9	9	9	9	9	9	1649.8	2042.2	3650.7	29561	38373	49920	22166	34693	74289	9	9	9	9	9	9	9	9	9	9	9	9	9	9	9	9	9	9
MWSmce160	231.1	175.04	230.094	C14H14O3	[M+H]+	Demethylsuberosin	Lignans and Coumarins	Coumarins	21422-04-8	1	1446800	2395400	5817100	11270	8066.6	3299.3	9	9	9	9	9	9	9	9	9	9	9	9	9	9	9	9	9	9	9	9	9	791.26	9	1088.8	9	9	9	726.95	9	9
MWStz323	234.15	91.05	233.142	C14H19NO2	[M+H]+	Paniculidine B	Alkaloids	Plumerane	97399-94-5	3	22776	21436	37332	14655	11632	11699	10691	14455	25736	38410	30634	21436	55463	42608	52697	30886	47617	39484	8762.2	16153	7995.3	9	5418.1	10781	8359.2	8374.6	4804.7	17420	22383	10223	18000	18092	16000	70328	42087	35036
pmb0490	235.14	147.04	234.137	C13H18N2O2	[M+H]+	p-Coumaroylputrescine	Alkaloids	Phenolamine	34136-53-3	2	184330	172110	667120	386520	270220	356600	480050	309420	752020	120550	248590	494590	134750	287090	361600	132880	354840	430950	202000	301320	252400	74852	52835	86052	101770	81182	185310	64727	87482	62590	9	9	9	216270	212380	188080
Hmlp006964	237.07	176.04	236.068	C12H12O5	[M+H]+	5,6,7-Trimethoxycoumarin*	Lignans and Coumarins	Coumarins	55085-47-7	1	47103000	8285400	53275000	191360	62794	170650	13772	11218	17974	8675.4	16325	10382	18577	5466.1	7197.1	12273	10366	68372	9	9	9	9	9	6986.5	17751	9	4442	9902.2	9	19242	9	9	9	3585.3	637.97	635.7
Jmbn003202	235.12	59.01	236.126	C10H20O6	[M-H]-	Butyl Beta-D-Fructopyranoside	Others	Others	67884-27-9	2	43357	53139	52395	9	9	9	9	9	9	50087	46510	76443	199990	313130	225420	172350	235340	235900	35197	30432	33452	21650	25607	28063	9	7757.6	9843.4	9	9	9	9	9	9	9	9	9
Lmhn003240	237.04	121.03	238.048	C11H10O6	[M-H]-	Benzoylmalic acid	Phenolic acids	Phenolic acids	22138-51-8	1	96701	86552	136110	79918	53546	36269	164260	99329	46779	2836000	1078600	896930	3607000	3374300	2847900	2363100	4700600	2317400	546840	1249900	521140	233420	229260	265000	203850	162760	172170	53576	65693	70959	26644	110440	27688	33037	47337	24909
Lmzn001925	239.09	195.1	240.1	C12H16O5	[M-H]-	3,4'-Dihydroxy-3'-methoxybenzenepentanoic acid	Phenolic acids	Phenolic acids	-	2	16019	16442	29701	111770	109030	77256	141380	170980	156700	208750	324900	466690	837550	1014000	859090	749240	802040	855590	33945	47138	87225	26180	36406	35451	54180	46052	59460	21387	6078.1	7967.1	4421.3	9817.4	7639	11684	6378.2	15553
pmp001101	242.12	227.1	241.11	C15H15NO2	[M+H]+	N-Methylflindersine	Alkaloids	Isoquinoline alkaloids	50333-13-6	3	153510	62342	96591	13216	7872.3	23010	15864	5494.1	16679	1113.7	2408	3854.4	1244.2	15283	4924	3648	9801.7	3447.4	9	9	9	9	9	9	9	9	9	9	9	9	9	9	9	9	9	9
pmf0527	245.12	159.2	244.11	C15H16O3	[M+H]+	Osthole	Lignans and Coumarins	Coumarins	484-12-8	2	326860	563200	1154600	8250.6	7568.9	4660.2	9	9	9	9	9	9	5378.3	5792.3	2718.8	2123.8	5358.5	2891.2	6076.1	7523.1	3438.7	22369	8598.3	8961.4	38950	8134.7	5478.3	78085	73431	17278	50001	22949	10228	5121.6	36742	5481.7
MWSmce385	245.12	69.07	244.11	C15H16O3	[M+H]+	Suberosin	Lignans and Coumarins	Coumarins	581-31-7	2	1457300	530090	1292900	22820	21516	15057	7320.4	6708	21932	13240	15108	12572	6702.9	24166	11171	11909	14592	9	22244	13358	19643	12262	13334	7535.5	19709	13696	8229.7	15363	4320.2	15275	15267	8199.3	9930.4	17390	17550	9121.1
MWSmce617	247.1	175.04	246.26	C14H14O4	[M+H]+	S-(+)-Marmesin	Lignans and Coumarins	Coumarins	13849-08-6	2	51312000	26580000	51171000	433200	354940	870980	382390	214500	355880	37138	34486	70053	9	9	9	9	9	9	54321	33123	31781	40577	47926	33614	109170	116750	43936	136450	98115	91790	87332	69833	85545	20655	10516	14829
pmp000479	252.23	196.2	251.225	C16H29NO	[M+H]+	N-Isobutyl-2E,4E-dodedienamide	Alkaloids	Alkaloids	-	2	1491700	1738600	3532300	9	9	9	9	9	9	9	9	9	4615.5	8852.8	5760.7	6637.3	5000.6	4170	9	9	6997.3	6877.3	7231.7	4599.9	5999.7	5161.5	6113.9	21629	18499	7350.4	5725	7789	3549.5	6053.7	5009.5	5652.4
Cmpp007319	261.11	189.06	260.105	C15H16O4	[M+H]+	7-Methoxy-5-Prenyloxycoumarin	Lignans and Coumarins	Coumarins	35590-41-1	2	427950	216890	1262200	35698	135760	150010	9	9	9	2513.7	1493.4	6225.6	3488.9	3520.1	5953.6	2240.1	4681.6	3552.5	172460	49442	26915	1137500	135370	39169	6117400	215800	127190	15789000	9467900	2051300	6574100	3781100	773970	937940	568150	810640
Cmpp007452	261.11	189.06	260.105	C15H16O4	[M+H]+	Auraptenol	Lignans and Coumarins	Coumarins	1221-43-8	2	425310	245100	1307600	52449	136280	134420	9	9	9	3767	1023.6	2467.7	4052.2	7712.4	9201.2	9	9	9	170330	52064	27939	1191300	139740	38538	6854000	225860	141140	16344000	9443200	1806900	6634000	3741700	780940	950720	542450	805470
Cmpp005475	261.11	189.06	260.105	C15H16O4	[M+H]+	Meranzin	Lignans and Coumarins	Coumarins	23971-42-8	2	18613	13567	42664	32345	244350	102320	9	9	9	9	9	9	8441.1	6827.7	12252	9	9	9	586520	128850	51127	2301800	126890	36754	11002000	198790	100880	19002000	14117000	2893700	7432000	7788700	887090	1775900	2193000	1315500
Zmnn010135	259.1	244.08	260.105	C15H16O4	[M-H]-	Sibiricol	Lignans and Coumarins	Coumarins	26481-12-9	1	21503000	14798000	57899000	253810	82863	67229	23339	13028	17197	4257.1	13985	9803.3	19478	12749	2436	9	9	9	9	9	9	967.01	1452.9	3064.8	10134	2151.8	2962.7	4720.8	2933.3	6586.9	1821.1	2516.3	4188.2	7857.2	2596.8	2568.4
Hmcp005031	263.09	191	262.084	C14H14O5	[M+H]+	Rutaretin	Lignans and Coumarins	Coumarins	13895-92-6	2	7502600	6301900	7836600	295810	123550	258530	102800	75648	71316	9694.7	13084	43157	9	9	9	9	9	9	9	9	9	9	9	9	17705	16670	7689.4	9	9	9	9	9	9	9	9	9
Lmlp003161	265.15	177.06	264.147	C14H20N2O3	[M+H]+	N-Feruloylputrescine	Alkaloids	Phenolamine	501-13-3	2	7126100	4146000	21728000	41180000	26788000	46957000	76443000	38773000	79785000	19447000	43676000	80333000	22005000	25926000	40443000	27859000	29140000	41894000	1000600	939610	1087600	4483800	3909200	2781300	16774000	20799000	11147000	12220000	10288000	12276000	2898700	1962600	2136700	9	9	9
Zmjp000966	268.11	136.06	267.097	C10H13N5O4	[M+H]+	Vidarabine	Others	Others	5536-17-4	2	25114000	7320700	25873000	16494000	13424000	19265000	19054000	21076000	18378000	17804000	12329000	17103000	27520000	21595000	27067000	30034000	26897000	23781000	57922000	20842000	51783000	52040000	48993000	44333000	22660000	62735000	61133000	59639000	54464000	42154000	60415000	36699000	27543000	13312000	13760000	13398000
pma2172	268.13	121	267.126	C17H17NO2	[M+H]+	cinnamoyltyramine	Alkaloids	Phenolamine	20384-14-9	3	8747.7	18857	32872	9	9	9	9	9	9	3343100	992270	41178	1231300	312980	1752200	715960	1416000	1527400	17417	21303	15083	7471.8	4689	4475.4	9	9	9	858.07	4272	2351.7	9	9	9	9	9	9
MWS20151	271.06	153.02	270.053	C15H10O5	[M+H]+	Apigenin	Flavonoids	Flavones	520-36-5	1	9	9	9	9	9	9	9	9	9	91106	50734	35974	301670	125380	163040	544000	261440	277100	142380	127750	145580	9	9	9	9	9	9	9	9	9	9	9	9	9	9	9
Lmyn006227	269.05	151	270.053	C15H10O5	[M-H]-	Galangin (3,5,7-Trihydroxyflavone)	Flavonoids	Flavones	548-83-4	1	9	9	9	3212.2	3769.2	1609.5	5652.6	17053	10252	214290	101900	49627	847310	356280	403250	1906200	717880	802790	538030	516630	619150	11503	8404	4603.9	5371	7114.4	1186.3	7292	5858.9	5006.5	6770.5	2460.3	5437.4	9	9	9
Hmmp008597	271.1	147.03	270.089	C16H14O4	[M+H]+	4,4'-Dihydroxy-2'-methoxychalcone (3-Deoxysappanchalcone)	Flavonoids	Chalcones	112408-67-0	3	4841900	11823000	11136000	9	9	9	9	9	9	9	9	9	9	9	9	4833.9	9	2286.7	9	9	9	9	9	9	11926	1078.1	9	20256	8256.8	9	14884	5535.4	2275.2	9	9	9
pmf0526	271.1	147.2	270.089	C16H14O4	[M+H]+	Isoimperatorin	Lignans and Coumarins	Coumarins	482-45-1	2	849950	1744300	763720	3493.6	24891	3337.5	1062.4	10052	1731	9	9	9	9	9	9	9	9	9	31252	6470.9	15584	30665	21921	156750	362770	17573	110680	917950	1911600	88819	546880	549680	12403	81070	58704	7535.6
mws1297	269.1	101.02	270.11	C13H18O6	[M-H]-	Benzyl glucoside	Phenolic acids	Phenolic acids	-	1	9	9	9	9	9	9	2064.1	5220.6	3135.1	47868	36995	57835	40629	72526	60922	52205	57808	90570	62645	82617	89009	239070	288920	351140	280210	394110	387330	206610	256430	250660	96879	152400	116510	12400	25004	15618
pme2960	273.08	153	272.068	C15H12O5	[M+H]+	Naringenin chalcone	Flavonoids	Chalcones	73692-50-9	3	97022	30286	67603	22731	19549	10410	24596	36449	29280	453930	130470	32494	807030	218290	347220	1466300	745380	608710	147550	127000	119710	94465	62009	58071	116240	102800	126700	114940	809800	102620	52419	345080	12080	50094	56520	19376
pme0376	271.06	151	272.068	C15H12O5	[M-H]-	Naringenin (5,7,4'-Trihydroxyflavanone)	Flavonoids	Flavanones	480-41-1	1	101050	25556	79756	20096	18018	8091.9	15936	33135	29703	537690	145650	35834	792920	244450	388380	2226600	906450	720130	201260	195290	197490	84059	55647	65506	118880	89981	111680	105130	693240	98708	42833	282720	16334	32033	45244	18605
mws0914	271.06	151	272.068	C15H12O5	[M-H]-	Pinobanksin	Flavonoids	Flavanonols	548-82-3	3	105280	24526	85783	20162	20424	7610.9	14950	31421	25473	585520	149320	31560	823770	243510	427060	2270000	901500	722810	208960	200350	194290	91430	58380	63474	105540	99081	122280	105030	712600	106100	46429	284370	14164	30038	53169	22511
pme3472	271.09	107.6	272.09	C12H16O7	[M-H]-	Arbutin	Phenolic acids	Phenolic acids	497-76-7	3	10187	10700	27050	46769	45999	53611	51393	75073	106380	147850	182560	383720	717630	1002300	850660	731560	794090	748530	75958	55200	95022	80616	174330	74241	94644	201870	123800	80165	65582	62115	6805.8	11962	6156.6	147560	153800	150550
Lmhn002926	279.05	163.04	280.058	C13H12O7	[M-H]-	p-Coumaroylmalic acid	Phenolic acids	Phenolic acids	-	3	87068	111770	246180	9	9	9	9	9	9	401410	176330	39546	134770	89716	78550	118500	146940	60761	9	9	9	130050	185380	134580	55331	108320	46931	7523.8	29796	22703	9804.6	59881	13294	70721	71428	50602
pmp001252	284.13	147.04	283.121	C17H17NO3	[M+H]+	p-Coumaroyltyramine	Alkaloids	Phenolamine	36417-86-4	3	1180600	1645400	3072000	1796400	829330	101030	276960	281830	13393	18285	194240	15365	9	9	9	9	9	9	9	9	9	9	9	9	16673	42883	6405.1	4417.2	45364	9419.5	9	18729	4972.3	9	9	9
Zmzp005934	284.3	102.09	283.288	C18H37NO	[M+H]+	Stearamide	Alkaloids	Alkaloids	124-26-5	2	104190	130810	86382	101050	116030	125700	86277	120410	111670	123700	99574	67309	126260	114120	115650	119690	113540	113020	120570	146260	97740	178320	184170	143940	91511	145780	148820	166400	103990	147370	75298	69394	52423	78659	68146	116750
Hmlp005105	285.08	270.05	284.068	C16H12O5	[M+H]+	3,7-dihydroxy-4'-methoxyflavone	Flavonoids	Flavones	-	2	9	9	9	33288	22529	9516.8	60097	103360	82023	1179700	620550	258770	2605500	1287400	1636500	3576400	2052800	1766200	1427800	1360500	1487100	84216	42435	26064	27681	54371	16056	21412	24967	32872	2620.6	8419.8	1242.2	9	9	9
mws0918	283.06	268	284.068	C16H12O5	[M-H]-	Prunetin (5,4'-Dihydroxy-7-methoxyisoflavone)	Flavonoids	Isoflavones	552-59-0	1	10921	8987.8	13298	34180	23040	17476	90927	150380	93244	260150	289880	381300	1866700	1060100	1361100	3015100	1677300	2139900	5667800	5982900	7371500	41730	15479	12140	22361	25862	9395	21281	22347	21569	4757.8	9416.7	6954.1	1730.7	8538.9	1918.1
Hmbp002730	287.06	153.01	286.047	C15H10O6	[M+H]+	Isoscutellarein	Flavonoids	Flavones	41440-05-5	2	9	9	9	37215	27695	13931	125710	113490	76911	522620	733010	410890	531900	290030	311110	1027700	896330	558580	2023200	1486300	1911500	9093100	3349900	6878600	9120100	8628700	10007000	11736000	10894000	12525000	3987400	6631700	5199200	263820	395630	503160
pme0088	285.04	151	286.048	C15H10O6	[M-H]-	Luteolin (5,7,3',4'-Tetrahydroxyflavone)	Flavonoids	Flavones	491-70-3	2	1918.8	9	1744.2	9277.2	18854	4689	6795.4	22281	7660.6	55066	42112	38719	104980	76820	49603	325570	119020	103470	131860	141700	139810	7441.7	7504.7	13135	19540	9	11597	20237	10275	9	4502.8	9	4034.7	1014.8	1411.6	1731.1
MWSHY0089	287.09	167.03	286.084	C16H14O5	[M+H]+	Sakuranetin	Flavonoids	Flavanones	2957-21-3	2	63550	10817	22513	4607.7	5688.1	4106.8	7020.9	13781	8783.9	77015	40462	35210	192690	165340	201270	148420	188650	209620	85033	85376	74912	9	9	9	6298.3	7557.5	3908.4	7273.2	4419.4	3641.1	9	9	9	9	9	9
mws1521	285.1	121.03	286.105	C13H18O7	[M-H]-	Salicin	Phenolic acids	Phenolic acids	138-52-3	3	223940	266520	517480	63653	75426	55284	64460	95369	87984	131690	94732	130280	218800	77013	186720	309100	139120	153050	277690	303710	345240	228640	196060	183880	182870	166520	159370	69270	57905	65131	48646	58544	53860	317980	337940	285490
MWSHY0145	289.07	153.02	288.063	C15H12O6	[M+H]+	Eriodictyol (5,7,3',4'-Tetrahydroxyflavanone)	Flavonoids	Flavanones	552-58-9	2	9	9	9	39412	37615	15580	43083	107210	16570	1130400	411420	87260	1060800	323630	409950	3095500	1057600	632730	164050	128590	145250	10684	9	9	28457	15543	13805	17096	54719	12820	14955	44053	4660.4	9	9	9
Lmdn006025	287.06	125.02	288.063	C15H12O6	[M-H]-	2-Hydroxy-2,3-dihydrogenistein	Flavonoids	Isoflavones	-	2	9	9	9	9	9	9	3569	4840.7	2754.5	41104	17492	9	48289	14079	12084	184330	60013	33329	32027	26705	26764	9	9	9	9	9	9	9	9	9	9	9	9	9	9	9
Jmgn005927	287.06	125.03	288.063	C15H12O6	[M-H]-	2-hydroxynaringenin	Flavonoids	Flavanones	-	2	9	9	9	9	9	9	1827.9	5665.9	974.72	51751	22215	2899.2	42297	14986	24636	147780	55581	31843	15829	11091	17187	9	9	9	9	9	9	9	9	9	9	9	9	9	9	9
Hmhn000927	287.08	125.02	288.085	C12H16O8	[M-H]-	Phloroglucinol-1-O-β-D-glucopyranoside	Phenolic acids	Phenolic acids	-	1	8770.8	10353	19467	119860	37886	33364	40029	378180	485200	3380500	1365000	1178400	789460	1089700	993680	896490	905020	880370	380030	198910	344020	1181900	1529000	1720600	2456200	2759600	2791600	1945500	1280300	2065800	257720	187650	284030	246070	312060	194840
Hmhp009670	294.24	95.08	293.235	C18H31NO2	[M+H]+	Dihydrobungeanool	Alkaloids	Alkaloids	-	3	9	9	9	9	9	9	5149.4	6615.7	3385.8	12312	9	9	9	9	9	9	9	9	28481	16273	107740	6814.3	7157.1	9	14510	9007.1	7050.8	8187.7	37281	39297	2167.8	5211.4	13684	9	9	9
MWSmce578	298.14	131.05	297.35	C18H19NO3	[M+H]+	Aegeline	Alkaloids	Phenolamine	456-12-2	2	9	9	9	9	9	9	5033.2	56385	4142.9	4651600	2025600	257390	3681800	1883500	4611100	1736500	2579400	2661700	9	20745	4366.4	9	9	9	9	9	9	9	9	9	9	9	9	9	9	9
MWSHY0021	299.09	256.07	298.084	C17H14O5	[M+H]+	Apigenin-7,4'-dimethyl ether	Flavonoids	Flavones	5128-44-9	2	9	9	787.9	3888.1	2686.1	2202.2	9150.5	9395.6	8250.8	2778.4	4267.6	18475	24679	34423	29007	26464	42085	49219	160500	129790	147030	9	9	9	9	9	9	9	9	9	9	9	9	9	9	9
MWSmce224	299.16	163.04	298.38	C19H22O3	[M+H]+	Auraptene	Lignans and Coumarins	Coumarins	495-02-3	2	59175000	5779400	19641000	824100	542640	284460	170830	137820	128000	70752	80454	145270	19765	27874	16190	12551	9815.8	12872	2703500	2939200	3832100	474290	398970	136980	592900	179990	89249	1676200	2691500	490000	561210	682770	182850	87639	42393	19656
pmp000001	301.07	286.05	300.063	C16H12O6	[M+H]+	Hispidulin (5,7,4'-Trihydroxy-6-methoxyflavone)	Flavonoids	Flavones	1447-88-7	2	9	9	9	702160	1676900	295500	1090400	2418400	1111400	7805900	3696200	3141400	14435000	6791600	9212100	20024000	10256000	8627800	12648000	11445000	14731000	1250000	815140	562660	458380	766700	246960	370560	460700	423300	53226	165700	148650	58538	44708	57026
Zmhn003257	299.06	284.04	300.063	C16H12O6	[M-H]-	5,7,2'-Trhiyroxy-8-methoxyflavone	Flavonoids	Flavones	-	1	16873	18222	7681.9	1366200	3152400	599010	2486300	5493800	2103000	14915000	7793800	6726200	29215000	11434000	16415000	47263000	22292000	17892000	22169000	22034000	26724000	1229200	743670	453280	422020	702380	198780	283180	357430	441390	106130	133870	84780	76149	69164	71974
MWSHY0009	301.07	286.05	300.063	C16H12O6	[M+H]+	Diosmetin (5,7,3'-Trihydroxy-4'-methoxyflavone)	Flavonoids	Flavones	520-34-3	3	13614	9902.3	7634.2	659930	1570100	326780	1230400	2774600	1145900	7112700	3657100	3695400	13971000	6311300	9416900	19035000	10460000	7969200	13239000	12815000	12809000	1382600	838320	502350	417470	744970	241700	358380	482490	451460	100530	177080	103870	49483	51090	49609
pmp001127	301.07	286.08	300.063	C16H12O6	[M+H]+	Chrysoeriol	Flavonoids	Flavones	491-71-4	2	19025	9	8860.2	689580	1524800	304000	1269500	2688600	1144100	6651500	3465400	3370400	14827000	6148400	9327500	19507000	9990100	8407000	12748000	11825000	13244000	1340000	907190	540080	462470	760350	256570	353360	433350	484310	97098	165240	138730	60052	55049	55558
Zmbp006041	301.07	167.03	300.063	C16H12O6	[M+H]+	6-methyl Luteolin	Flavonoids	Flavones	-	2	9	9	9	122290	68689	33955	193660	265590	135630	1220200	732920	484750	1624900	1063800	1205900	1064400	1199400	1633900	1348500	1162000	1019300	77716	32917	11737	14086	90961	11854	11562	17798	16797	9	9	9	9	9	9
Xmyn008071	299.06	284.03	300.063	C16H12O6	[M-H]-	Gnetifolin B	Flavonoids	Flavones	140671-06-3	1	25215	18464	13633	1478200	3331200	667930	2747600	6070300	2283500	14949000	9053200	7323400	30351000	12125000	16526000	46617000	23117000	18442000	23851000	22736000	26770000	1328700	765870	467180	456300	710280	211840	339640	432660	430630	94418	147630	92767	89198	82694	77400
Lmjp004941	301.07	286.05	300.063	C16H12O6	[M+H]+	Rhamnocitrin (7-Methylkaempferol)	Flavonoids	Flavonols	569-92-6	3	12855	7566.8	9384.9	657180	1594300	353600	1312400	2617300	1035100	6577000	3535600	3332400	13525000	6357500	9072800	19175000	10067000	8215100	12969000	12531000	9430100	1346000	895450	535930	465310	775110	227470	342190	489480	473470	80189	159110	111360	51386	49508	59891
Zmhn001358	299.08	137.02	300.084	C13H16O8	[M-H]-	4-O-Glucosyl-4-hydroxybenzoic Acid*	Phenolic acids	Phenolic acids	-	1	52931	52602	34745	38696	57850	54692	35907	81080	120120	526570	65829	67158	9	9	9	9	9	9	433700	287760	528280	1761800	2026100	2365200	1134100	1378200	1610800	1537200	1262400	1372600	469080	562670	579060	783940	1279900	870770
Lmsn002247	299.08	137.02	300.085	C13H16O8	[M-H]-	1-O-Salicyloyl-β-D-glucose*	Phenolic acids	Phenolic acids	60517-74-0	1	45787	56109	31119	43319	54522	43489	52903	69985	108650	567860	52186	84869	355000	53557	147780	61662	72307	72036	395880	235550	467660	1691100	1965700	2306000	967870	1295700	1638700	1592500	1046800	1425100	429140	574920	525110	834040	1278100	960510
pmc1990	299.1	223.1	300.1	C17H16O5	[M-H]-	4'-Hydroxy-5,7-dimethoxyflavanone	Flavonoids	Flavanones	-	3	558460	502810	358230	715790	692630	756110	600930	665020	583010	615230	658620	581560	562940	577160	526100	513860	747530	646070	672460	1087100	811420	677790	675230	565350	671650	519080	716540	681260	601950	552750	540390	572020	474320	608960	550110	644080
Zmnn009241	300.09	270.04	301.095	C16H15NO5	[M-H]-	Citpressine I	Alkaloids	Quinoline alkaloids	81525-58-8	1	103440	77779	96318	12760000	7792200	32331000	22721000	8691700	55704000	1113300	9435600	17366000	512340	1086400	697190	546780	297050	1917300	466600	239510	600350	13514	7541.9	26766	11789	46548	12259	10759	5575.4	26838	4678.4	3973.8	3718.8	705.3	1556.1	3621.4
Hmyp002315	303.04	257.04	302.042	C15H10O7	[M+H]+	3,5,7,4'-Tetrahydroxy-Coumaronochromone	Others	Others	-	2	9	9	9	9	9	9	14439	29761	19721	33685	58723	20577	57160	39977	47318	69666	78027	32743	38475	31725	39427	35390	24136	36725	59640	36121	41681	47318	32413	51484	45232	42269	26316	9	9	9
mws0920	301.04	151	302.043	C15H10O7	[M-H]-	Tricetin (5,7,3',4',5'-Pentahydroxyflavone)	Flavonoids	Flavones	520-31-0	2	9	9	9	276940	147740	66850	176710	326230	461340	557730	638880	572360	580730	521730	568110	629580	657390	690050	621800	686820	736960	523890	580810	684200	707630	667490	616490	589390	716540	725680	739240	894790	877590	63998	153300	13730
mws0463	301.07	164	302.079	C16H14O6	[M-H]-	Hesperetin	Flavonoids	Flavanones	520-33-2	1	9	9	9	178140	220260	44706	162600	659050	112730	7884000	3702000	970220	11303000	4388700	5786400	17036000	8066400	4345700	115110	71845	76216	15019	19278	13704	26626	28206	21116	14224	9	10049	9	9	9	11619	9	9906.4
mws1033	303.09	153.02	302.079	C16H14O6	[M+H]+	Homoeriodictyol	Flavonoids	Flavanones	446-71-9	2	10329	44063	21818	320330	249200	143790	383930	404680	210370	16851000	1137300	372840	2654700	1153800	1687300	4675300	1773200	9	135090	173570	78492	63205	54529	62704	105490	93736	97706	51503	303350	105510	58136	646390	63962	188140	156030	151980
Zmhn000892	301.09	139.05	302.1	C13H18O8	[M-H]-	4-O-Glucosyl-3,4-dihydroxybenzyl alcohol	Phenolic acids	Phenolic acids	-	2	27371	18982	24129	68045	89521	67748	79643	96605	76642	141200	107610	113870	105520	97204	86383	101500	93821	85277	24836	17789	30558	143700	258350	193100	144520	208300	201110	56531	70775	58546	11938	13765	10539	110600	185020	98816
Cmmn013275	301.22	301.22	302.225	C20H30O2	[M-H]-	Isopimaric acid*	Terpenoids	Ditepenoids	5835-26-7	2	233960	45056	127600	60367	193560	64161	84129	57754	59217	233080	92223	126420	256770	266790	869880	214680	167320	87342	353220	123410	175790	192680	194320	132450	521600	254320	232460	841870	1167700	464940	2777600	485970	124760	558920	145250	162980
Lmbn014696	301.22	301.22	302.225	C20H30O2	[M-H]-	Pimaric acid*	Terpenoids	Ditepenoids	127-27-5	2	242470	48648	127870	48269	190930	74309	79927	57424	71927	219830	54559	132810	271240	279340	916620	242350	175030	86996	346990	127580	186870	197700	186750	138220	526070	276080	224450	799360	1192900	460760	2725600	517030	114240	500240	162980	164100
Lmhn003074	309.06	193.05	310.069	C14H14O8	[M-H]-	Feruloylmalic acid	Phenolic acids	Phenolic acids	-	1	592190	428470	535740	300940	244930	140540	828250	525680	194030	19183000	5753600	2877000	5708500	4015900	3320200	6411400	6397600	2874100	5185200	15442000	4447600	9226800	8646600	10132000	3622900	3620600	2742700	773180	1178300	762030	385380	2463900	401100	127760	161040	131850
MWSHY0047	313.11	269.08	312.1	C18H16O5	[M+H]+	5,7,4'-Trimethoxyflavone	Flavonoids	Flavones	5631-70-9	2	9	9	9	242860	159370	99639	486020	489240	448140	1610100	1233500	1380000	3424100	3502600	3292200	3880300	4538600	4367800	10637000	9586600	10170000	678390	427230	352990	284710	454450	163610	266480	327370	297270	26695	75766	35224	12713	17352	10427
Hmxp007521	315.09	300.06	314.079	C17H14O6	[M+H]+	3’,4’-Dihydroxy-7,5’-dimethoxyflavone	Flavonoids	Flavones	-	2	9	9	9	60336	37284	18578	83711	153860	141740	538220	396850	472900	1521700	1365700	1704900	9	1600000	1653200	6967900	7209700	8360100	1258200	833830	741650	387110	758400	292560	286120	344150	404970	48507	91683	96177	9	31708	12193
mws0038	313.07	283	314.079	C17H14O6	[M-H]-	Kumatakenin	Flavonoids	Flavonols	3301-49-3	1	9	9	9	381750	521990	226340	1005300	1453500	859140	4729700	3190400	2933500	6134600	2901300	2946700	11915000	6194000	4037500	3146000	4310000	3941800	70533	44328	28307	32416	56710	14187	23747	32194	28843	5583	10073	6529.9	1785.8	3805.7	2042.6
Lmmn002179	313.09	107.05	314.1	C14H18O8	[M-H]-	Methyl salicylate-2-O-glucoside	Phenolic acids	Phenolic acids	10019-60-0	2	297660	705250	435720	1568400	1079200	1962500	1434000	1283800	1040900	3032600	2872000	1474200	1216500	1319600	1038100	1277500	1445400	983000	750240	635520	647760	3112400	2765300	3164500	2552900	2402800	2440800	1604900	1354100	1615300	1061900	1391700	1267400	2859500	3660000	3168500
Lmyn002403	313.09	101.02	314.1	C14H18O8	[M-H]-	Mandelic acid-β-glucoside	Phenolic acids	Phenolic acids	-	3	358230	512030	938010	305580	195060	164890	484090	466170	575060	4375200	2780100	2618800	4228300	3621000	3673300	4031400	1938000	4051300	2829500	2774300	2992900	775100	693010	971740	752720	737870	860340	465340	489080	501740	283990	341330	310180	232100	339040	182190
Lmdp003808	317.07	302.04	316.058	C16H12O7	[M+H]+	Azaleatin (5-O-Methylquercetin)	Flavonoids	Flavonols	529-51-1	2	9	9	9	13713	12729	8914.2	17826	31245	49930	331410	285800	123470	697150	368230	481220	705610	619900	608800	2058100	1924700	2134500	134730	55529	41052	50507	75929	23274	44538	56346	71504	12064	15949	5373.7	32651	15053	76629
pmp000003	317.07	302.04	316.058	C16H12O7	[M+H]+	Nepetin (5,7,3',4'-Tetrahydroxy-6-methoxyflavone)	Flavonoids	Flavones	520-11-6	2	9823.1	13129	9	9	9	9	53506	110970	155930	1063600	595470	536760	1823600	1018000	893770	3887000	2131000	1579600	1260000	1349200	1338400	9	9	9	9	9	9	22989	21573	26719	9520.1	11480	4261.9	9	9	9
mws0988	315.05	165	316.058	C16H12O7	[M-H]-	Rhamnetin	Flavonoids	Flavonols	90-19-7	3	1408.2	1428.9	879.65	15182	15376	5244.1	19492	32999	17612	280410	173640	82241	453490	290030	351900	471330	365210	342430	312270	343080	408150	19050	14010	10047	8545.1	15581	7163.2	7620.6	7648.7	9576	9	9	9	9	9	9
pmb2871	315.07	153	316.079	C13H16O9	[M-H]-	1-O-Gentisoyl-D-glucoside	Phenolic acids	Phenolic acids	23445-11-6	1	2270100	1851900	1723800	1389200	1789800	1130200	2005000	2674200	2034200	2519300	3035100	3520400	1341800	1773800	1452100	1277500	2093400	2267600	1391000	664040	1367400	3200600	2308500	3666900	2459500	7485800	9953500	2007800	1584300	1663600	483550	593490	541550	2858600	5514000	2955600
pmn001367	315.07	153.02	316.079	C13H16O9	[M-H]-	Protocatechuic acid-4-O-glucoside	Phenolic acids	Phenolic acids	-	1	2980000	2849100	2631900	2246600	2913500	2795700	3799400	4472000	3351200	2822500	4296300	5539700	1630100	2502000	2019300	1533300	2895000	3432100	1541900	1103700	1502600	4341800	3436800	4590300	5754000	12259000	15395000	2423400	1986000	2167500	589270	675650	663410	3164100	5917600	3040200
Lmsp009013	317.1	197.05	316.095	C17H16O6	[M+H]+	4',6-Dihydroxy-5,7-dimethoxyflavanone	Flavonoids	Flavanones	6951-57-1	2	26428	9	12428	147010	92844	40502	124790	288200	131750	2272000	1252300	704610	3922600	2854100	3589900	3423800	2755600	3221400	2767000	2991400	3527300	247020	220840	115250	88373	215390	94792	114350	139740	137690	19726	36203	25713	9	9	9
Jmwn002172	315.11	135.04	316.116	C14H20O8	[M-H]-	3,4-dihydroxyphenylethanol-β-D-glucopyranoside	Phenolic acids	Phenolic acids	-	2	16017	15941	46466	64920	18657	80601	72454	31660	66177	14234	27201	46851	28773	46214	37645	30614	41705	50059	25219	24217	21963	16601	22452	23337	14950	14630	12365	15777	15055	18628	16392	12459	13007	9	9	4634.2
Zmtn001661	315.11	153.02	316.116	C14H20O8	[M-H]-	Vanilloloside	Phenolic acids	Phenolic acids	74950-96-2	1	3055600	2870600	2508300	1837100	2694400	2802700	3580300	4537000	3253600	2819200	3678100	5084400	1533100	2464000	2002000	1435100	2790000	3184700	1488600	1102700	1501800	3457300	2564300	4514300	5718900	11206000	13023000	2102900	2010800	1858200	592950	597920	822850	3172800	5461100	2766800
Hmtn001120	315.11	153.06	316.116	C14H20O8	[M-H]-	5-(2-Hydroxyethyl)-2-O-glucosylphenol	Phenolic acids	Phenolic acids	-	2	221940	383980	364950	254510	135690	147640	318260	269820	368520	416090	475700	532090	483240	688360	501720	499060	564900	718870	308590	281410	351920	522550	750440	729540	626440	619750	535350	770470	578970	547490	250120	346690	339000	443620	641410	301550
pmb0751	321.1	147.3	320.09	C16H16O7	[M+H]+	Trans-5-O-(p-Coumaroyl)shikimate	Phenolic acids	Phenolic acids	-	3	144010	106730	83915	9668.9	10635	9	12562	23066	7767.9	143640	41413	20227	462830	252270	204680	222250	268140	138930	658640	517210	2409300	111150	141560	129680	99553	72791	61188	51599	41112	56998	22195	26196	24466	106120	92622	76484
pmb0235	323.09	177.4	322.084	C19H14O5	[M+H]+	O-Feruloyl coumarin	Lignans and Coumarins	Coumarins	-	3	15407	57385	66421	19920	27035	50153	56862	41510	87908	70398	93027	68172	170800	160650	164450	204190	238280	271480	108290	112740	149170	254020	229980	381580	183450	450880	462770	103140	90087	119000	26446	37349	33737	19603	27287	18439
mws0983	326.31	62.06	325.298	C20H39NO2	[M+H]+	N-Oleoylethanolamine	Alkaloids	Alkaloids	111-58-0	1	538830	710840	879530	84659	363120	207930	157330	366590	303540	213500	324050	240000	39270	56039	42169	34302	45594	65093	237810	197160	209060	1157700	1270200	2779600	4589600	6692900	13397000	2071200	557950	1785400	50013	32518	73705	6114900	6583900	5133100
Zmhn002301	325.09	163.04	326.1	C15H18O8	[M-H]-	p-Coumaric acid-4-O-glucoside	Phenolic acids	Phenolic acids	117405-48-8	1	607480	1297500	1306000	744370	802180	364110	1103700	1215000	1754100	9569400	7421300	4686000	4720500	4542300	4183500	9137000	8640400	5228000	3113800	3188900	2045400	148030	132260	105330	186340	168580	250500	50966	27933	51300	23910	27596	9	64772	49439	64292
Jmwn002494	325.09	119.05	326.1	C15H18O8	[M-H]-	(2E)-3-[4-(β-D-glucopyranoside)-phenylacrylic]-acid	Phenolic acids	Phenolic acids	-	2	17681	23228	28306	12324	7590.3	5451.6	9	9	9	76723	26828	10816	9	9	9	14566	14740	12307	124780	54697	9	123040	70047	83359	80844	69745	53621	47136	52598	62292	54679	67870	59312	108470	229430	162160
Hmhn003067	325.09	119.05	326.1	C15H18O8	[M-H]-	Phenylpropionic acid-O-β-D-glucopyranoside	Phenolic acids	Phenolic acids	-	1	457770	1060800	808920	491650	604320	216560	763050	905350	1268900	7067700	5278600	3170800	3049500	3504300	3602800	6728000	6291400	3693800	2033400	2469400	1486100	110910	105260	87374	121670	88151	155340	32701	23827	28990	7244.7	9	8351.6	44713	26303	37284
Lmsn003111	325.09	145.03	326.1	C15H18O8	[M-H]-	1-O-p-Coumaroyl-β-D-glucose	Phenolic acids	Phenolic acids	7139-64-2	1	34108	71898	37863	10205	56820	41261	9	37258	45857	105530	66186	25266	266130	89526	265050	138840	306610	104390	14515000	7378900	25208000	914430	731650	1267200	1393100	980330	1346300	1783500	1640600	1912100	2674500	2622200	2689400	480060	695680	587870
Zmjp008503	329.1	296.07	328.094	C18H16O6	[M+H]+	Salvigenin	Flavonoids	Flavones	19103-54-9	2	30598	25648	14683	1016000	545300	357140	1299600	1860200	1913000	3798400	3354900	4733000	8203000	11066000	12028000	6775200	14285000	14129000	36419000	33554000	37262000	3750600	2515600	2013300	1822100	2559700	1335300	2007700	1810400	2084400	355050	648720	411140	88720	75330	104060
Hmxp006108	329.1	314.07	328.095	C18H16O6	[M+H]+	3-Hydroxy-5,7,8-trimethoxyflavone*	Flavonoids	Flavones	103393-10-8	2	9081.6	4757.4	4710.9	1107900	683490	264500	1394300	2484900	1830800	11273000	7887200	9419200	17961000	17584000	19114000	13452000	21386000	21339000	52419000	48170000	46490000	3255600	2259600	992630	1645700	2645400	801250	1836400	2099100	1796600	216990	530700	277630	127170	79495	108740
Hmxp006586	329.1	299.05	328.095	C18H16O6	[M+H]+	5-Hydroxy-7,3’,4’-trimethoxyflavone*	Flavonoids	Flavones	29080-58-8	2	9	9	9	74403	56656	22406	136520	281280	101850	5946000	3360800	1066400	10257000	5602300	7221900	12593000	7765200	6100800	13684000	15788000	16542000	1542700	1070000	456420	616780	1309800	310780	571960	800870	640660	101810	191360	78779	31128	46626	39009
pmp001044	329.16	167.11	328.152	C16H24O7	[M+H]+	Jasminoside C	Terpenoids	Monoterpenoids	214125-05-0	2	25627	9	36410	61318	43116	123110	117270	189940	163270	678150	467460	258090	259960	574270	167450	800900	574920	324530	137250	186420	177750	101490	104970	71033	107610	47629	36180	16434	9	19161	9	9	9	9	9	9
Lmjp005016	331.08	298.05	330.074	C17H14O7	[M+H]+	Cirsiliol (3',4',5-Trihydroxy-6,7-Dimethoxyflavone)	Flavonoids	Flavanones	34334-69-5	2	9	9	9	70681	98786	34941	128830	227840	122120	1319500	797310	495180	1178000	780710	863220	2078200	1164600	1184100	1312200	1526700	2033000	139160	90005	54263	40934	60694	23304	42684	60017	25389	9	10229	12087	9	3646.9	2774.2
Hmhp005160	331.07	316.05	330.074	C17H14O7	[M+H]+	Rehderianin I	Flavonoids	Flavonols	90965-30-3	2	9	9	9	2190300	3443000	740720	3414900	8253800	4630000	36697000	22350000	18937000	45449000	28729000	35714000	53492000	40672000	38273000	29146000	30154000	32037000	2475700	1988500	1073000	875110	1719000	478880	657900	1115200	959140	127990	317370	185770	40063	44487	50359
MWSHY0169	331.08	301.04	330.074	C17H14O7	[M+H]+	Jaceosidin	Flavonoids	Flavones	18085-97-7	2	9	9	9	38120	21812	13839	54206	101630	80879	829390	1133800	418930	3409800	1370000	1430200	4968400	1719400	1637400	6901300	5532800	6579700	911930	673890	400130	293580	558380	229000	217380	352880	304990	18380	68506	47678	16304	12048	18414
Lmmn003663	329.09	167.04	330.095	C14H18O9	[M-H]-	5-Glucosyloxy-2-Hydroxybenzoic Acid methyl ester	Phenolic acids	Phenolic acids	-	3	527820	386850	327160	127210	130420	117420	176240	164480	252740	191850	184050	105270	121180	94411	117800	187660	166440	96888	388760	322680	448110	754370	366000	572180	1270700	821140	1273100	543700	560190	777840	483490	752360	531110	337700	414920	259260
Smhn002346	329.08	167.03	330.095	C14H18O9	[M-H]-	2,4,6-trihydroxy-acetophenone-6-O-b-D-glucopyranoside	Phenolic acids	Phenolic acids	-	3	1271100	2724600	2075400	1767400	2033800	1188300	1250400	2320300	1302400	2329400	3109400	3936900	2013000	1013700	1784800	2736100	1877100	1601400	388500	205690	386860	2255400	2759100	3195600	3649500	2855000	3084500	2071100	1247800	1049500	353670	496750	397610	8671000	9346800	7815000
Zmhn001883	329.09	209.04	330.095	C14H18O9	[M-H]-	Vanillic acid-4-O-glucoside	Phenolic acids	Phenolic acids	32142-31-7	2	9	9	15667	48170	135180	64727	45639	149540	160390	309470	311110	175560	84687	69334	132740	100150	72625	87823	306800	224530	277710	3312300	4143000	4652100	2798600	3067900	3279400	4072100	2741900	2650700	844620	999560	1014500	1074800	1788300	1158400
Lmsp011053	331.12	197.06	330.11	C18H18O6	[M+H]+	7-Hydroxy-2',5,8-Trimethoxyflavanone	Flavonoids	Flavanones	-	3	9	9	9	196100	114380	55625	229090	442630	329730	1005300	969640	1223900	1708700	2181800	2179700	1177400	1977800	2651800	6443300	4815800	6465600	341540	218100	177020	119850	166550	110790	113240	124260	153160	16020	31933	26688	2960.9	3749.5	6495.5
pmp001045	331.14	151.11	330.131	C15H22O8	[M+H]+	Bartsioside	Others	Others	62133-72-6	2	455420	308190	294610	298490	495660	239200	368940	605410	276780	137530	416100	374950	146900	257580	227590	170740	146660	146150	56056	48182	76158	130950	79405	107380	266890	316180	168780	9	39296	39127	20640	12807	51452	100450	67340	70959
pmn001517	329.12	167	330.131	C15H22O8	[M-H]-	3,4,5-Trimethoxyphenyl-1-O-Glucoside	Phenolic acids	Phenolic acids	-	3	2058000	4301100	3408700	2990200	2943200	1892800	2068900	3645400	2332200	4278200	4556000	6206100	3394400	1753300	2802600	4674400	3065500	2655700	508980	300040	511340	4154300	4265500	4744800	5597900	4138000	4529600	3144700	1842500	1390400	574770	774340	648250	15583000	15031000	13674000
Lmtp004722	333.06	153.02	332.053	C16H12O8	[M+H]+	Mearnsetin	Flavonoids	Flavones	16805-10-0	2	9	9	9	9	9	9	9	9	9	9	9	9	46493	10467	37160	71278	39157	61108	256880	274770	419660	336480	216060	433570	243740	223750	806930	138150	144740	242420	76188	48171	38097	6805.4	35511	16935
MWS20201	333.08	171.03	332.074	C13H16O10	[M+H]+	1-O-galloyl-β-D-glucose	Phenolic acids	Phenolic acids	13405-60-2	2	214000	473780	279870	1027800	913030	852510	802110	756470	726300	75810	152210	216360	9	9	9	9	9	9	9	9	9	9	9	9	72237	117330	99906	62223	79390	71078	55092	30444	73745	9	9	9
Lmmn001294	331.1	153.02	332.111	C14H20O9	[M-H]-	Koaburaside	Phenolic acids	Phenolic acids	41653-73-0	1	2249700	7179700	4218800	9565200	18717000	13804000	6998400	12685000	11150000	2850400	5946700	5623100	218540	244940	213240	124040	164400	190410	19899	22959	40368	141190	140060	147470	424600	503810	489110	321690	382820	306920	49107	50465	52947	856340	1108400	995910
pmb0382	339.09	177.2	338.079	C19H14O6	[M+H]+	O-Feruloyl 4-hydroxycoumarin	Lignans and Coumarins	Coumarins	-	2	1318600	2187900	989230	837290	1123600	867110	973140	1336400	1138800	668680	2129100	701430	954950	1159500	1105100	442710	525540	683930	254290	127560	194860	1183700	2033000	1696500	1698700	1744300	2700200	520710	416040	430530	61512	37498	69774	9	49142	75027
pmn001421	337.09	191.05	338.1	C16H18O8	[M-H]-	3-O-p-Coumaroylquinic acid*	Phenolic acids	Phenolic acids	87099-71-6	1	693620	32434000	13518000	125310	44386	26150	118920	148420	43645	42949000	19073000	1005200	43731000	9467600	28191000	49341000	40649000	21546000	1954600	589120	1300500	3721400	4582400	5542500	1218000	1295200	1176200	233960	172440	279120	68391	89034	17890	68767	80464	74952
pmb3074	337.09	191.05	338.1	C16H18O8	[M-H]-	5-O-p-Coumaroylquinic acid*	Phenolic acids	Phenolic acids	1899-30-5	1	571590	34206000	12301000	93046	46071	23731	99171	157600	35396	40938000	17467000	914100	43145000	9032900	27168000	47889000	40901000	23602000	1786200	555880	1267200	3790000	4473100	5239900	1498900	986870	988480	223540	122730	273620	22353	74029	30444	85028	92641	58800
MWSHY0138	339.16	219.1	338.152	C21H22O4	[M+H]+	Bavachinin	Flavonoids	Flavanones	19879-30-2	2	762840	252660	938250	2302000	2545200	1388100	1993800	2771300	2020900	133570	458120	1197800	4292.2	3855.4	796.6	9	9	9	9	9	9	9	9	9	9	9	9	9	9	9	9	9	9	9145.3	9778.1	11653
MWSmce310	339.15	203.03	338.4	C21H22O4	[M+H]+	Bergamottin	Lignans and Coumarins	Coumarins	7380-40-7	2	9	9	9	5203.9	10266	7173.6	7519.7	9	9	1032.5	9	9	2076.3	9	9	9	1220.3	9	2669.1	1434.7	9	5497.9	5648.4	1480.8	11984	1822.1	2870.2	17341	31803	6542.4	9515.5	13702	2992.7	1060.6	685.52	9
Cmyn001328	339.07	177.02	340.079	C15H16O9	[M-H]-	Daphnin	Lignans and Coumarins	Coumarins	486-55-5	3	79744	120570	388880	213800	215550	312630	179130	140530	263310	740410	649900	346750	303530	418450	298720	450020	363920	488380	319110	221210	298950	180590	113790	154450	297970	315400	127820	167860	45498	143300	21522	56980	15288	49032	146410	17212
mws1015	339.07	177	340.079	C15H16O9	[M-H]-	Esculin (6,7-DihydroxyCoumarin-6-glucoside)	Lignans and Coumarins	Coumarins	531-75-9	3	90520	92065	406620	209010	206280	231160	178160	129400	248740	679410	581990	323490	281280	347220	296600	382950	350350	428830	265110	205690	305770	181080	99767	146850	300090	277780	135400	195000	44023	120610	25216	36487	11855	61684	112510	22557
Lmbn001162	339.07	177.02	340.079	C15H16O9	[M-H]-	Esculetin-7-O-glucoside	Lignans and Coumarins	Coumarins	-	3	81965	127770	387460	138010	197610	223800	149070	116320	260740	659360	594060	314000	229820	351930	309840	410310	364270	373110	249890	118570	226550	158280	96069	122550	210350	239630	108570	162770	35420	87368	16281	39393	56853	70197	126010	16972
Xmgp006913	341.14	137.06	340.131	C20H20O5	[M+H]+	2,4,2',4'-tetrahydroxy-3'-prenylchalcone	Flavonoids	Chalcones	-	3	213830	154780	424660	728490	9	9	175280	83838	164040	673570	229740	9	9	9	9	9	9	9	31202	46613	106420	91305	72941	64170	408070	225380	184460	9	9	9	9	9	9	128230	100210	75872
Lmsn002548	341.09	161.02	342.095	C15H18O9	[M-H]-	1-O-Caffeoyl-β-D-glucose	Phenolic acids	Phenolic acids	14364-08-0	3	9	9	10268	9	14533	9	9	11679	9	214740	28790	11494	58493	53976	113900	36720	57506	55602	1132500	601500	2119100	5557500	5754000	10289000	1746600	1196000	2897200	920200	655410	1439300	1438200	1040400	1339500	1691200	2630900	2109400
Jmwn002620	341.09	161.02	342.095	C15H18O9	[M-H]-	Vanillic Acid-4-O-Glucuronide	Phenolic acids	Phenolic acids	-	3	14266	2961.3	9	9199.9	14695	9	9	16137	11643	9	31305	15023	62737	70745	74012	57470	78475	49905	1088800	586440	2293900	5705700	6144900	10604000	1785200	1338000	2944200	941310	702320	1286300	1411400	991400	1308600	1716600	2507400	2118400
MWSHY0128	343.12	313.08	342.11	C19H18O6	[M+H]+	6-Demethoxytangeretin	Flavonoids	Flavones	6601-66-7	2	8413	4866.9	7681	87379	76278	39787	146680	150740	197320	527100	442320	445030	1305300	1111800	1172100	1244600	1339400	1490000	3459000	3196500	3542500	356120	276140	220110	197940	247090	162870	188470	195850	212640	32441	68746	54513	19851	12616	25967
mws0906	341.12	179	342.131	C16H22O8	[M-H]-	coniferyl alcohol-4-O-glucoside (Coniferin)	Phenolic acids	Phenolic acids	531-29-3	2	49928	58586	35050	592040	700130	98668	615420	925080	527140	4161100	2702900	1498400	265120	168670	184940	601140	656070	339140	3640700	5501400	1695900	1529300	1824500	2411900	775540	582770	561030	1098000	1151700	1058000	2477500	2381600	2246300	3313200	4027400	4017400
Zmhp004065	345.1	330.07	344.089	C18H16O7	[M+H]+	7,8-Dihydroxy-5,6,4'-trimethoxyflavone	Flavonoids	Flavones	-	2	49897	14454	9	2184800	3156000	1115900	4771500	7752200	4315000	26717000	20683000	19531000	41146000	28540000	30256000	57686000	38574000	34237000	30667000	34961000	37349000	5928300	4820300	3427500	2376600	4092200	1572500	1714700	2257900	2043700	232700	570170	454360	82246	135810	106760
Hmhp005846	345.09	330.07	344.09	C18H16O7	[M+H]+	Tenaxin I	Flavonoids	Flavones	86926-52-5	2	24084	10176	9	1956600	3199400	1158000	3781900	7255500	3912800	29599000	21532000	18902000	38514000	27485000	29938000	53146000	37954000	32867000	29063000	32791000	34373000	6145000	4897000	3208700	2406300	3862700	1424500	1542500	2080800	1769300	238290	596580	485780	70897	130590	114050
MWSHY0168	345.1	330.08	344.09	C18H16O7	[M+H]+	Eupatilin (5,7-Dihydroxy-3',4',6-Trimethoxyflavone)*	Flavonoids	Flavones	22368-21-4	2	24943	12055	9	2205700	3196400	1088600	4172400	7675100	4277000	30562000	21498000	20102000	39982000	28773000	31894000	53786000	38618000	34289000	29253000	31073000	35366000	6069000	4603300	3461600	2660700	3932600	1694800	1552600	2046000	2128400	221300	662960	480160	60257	139310	111710
MWSHY0054	345.1	312.06	344.09	C18H16O7	[M+H]+	Eupatorin*	Flavonoids	Flavones	855-96-9	2	89871	28650	23911	5290900	7123800	3494800	8251300	14118000	10581000	46148000	37934000	29696000	49769000	38341000	42462000	61883000	50065000	42236000	26847000	35871000	34248000	4113300	3589100	2178000	1974900	4084200	1246000	1362100	1894300	1890900	260700	686970	378820	68709	79656	75192
Lmjn005592	343.08	313.04	344.09	C18H16O7	[M-H]-	Cirsilineol (4',5-Dihydroxy-3',6,7-trimethoxyflavone)	Flavonoids	Flavanones	41365-32-6	2	6361.6	4044.9	3748.9	195960	246200	85250	361780	646280	477460	4004700	2389200	2187200	8667700	5980600	7313200	10569000	7256100	7485200	11308000	12926000	15084000	1532600	1056500	750090	535520	939330	316560	365940	454210	454080	41653	107660	80911	13329	24588	24076
Lmjp005871	345.1	312.06	344.09	C18H16O7	[M+H]+	Penduletin (5,4'-Dihydroxy-3,6,7-trimethoxyflavone)	Flavonoids	Flavones	569-80-2	2	53425	20565	18327	5249700	6427000	3351400	8456000	14284000	10318000	44381000	35223000	28430000	51013000	37810000	40465000	35491000	47809000	41454000	27907000	35290000	31455000	4087500	3905300	2053500	1908300	3959100	1281000	1173400	2005800	1943900	223920	593990	382360	59793	75608	96591
Zmln000899	343.11	181.05	344.111	C15H20O9	[M-H]-	Syringaldehyde-4-O-glucoside	Phenolic acids	Phenolic acids	-	2	101360	54661	188930	198660	9	227310	161100	9	44721	473100	211980	44177	146760	60306	79631	207230	115260	80653	78728	709860	105590	553890	385740	812820	293360	155260	362810	182410	138100	195490	261200	224060	284730	1001200	1338500	815780
Lmmn000774	343.1	181.05	344.111	C15H20O9	[M-H]-	Dihydrocaffeoylglucose	Phenolic acids	Phenolic acids	-	3	19214	13842	19341	9	28115	25864	48517	58929	83318	433000	212040	129110	271170	198200	445700	460510	280930	294840	190000	229060	226100	1403100	1517300	2080500	935360	763900	1056900	778020	760560	883930	740960	1007800	729280	2203600	2654900	1970400
HJAP058	345.1	284.07	344.125	C19H20O6	[M+H]+	5,6,7,4'-Tetramethoxyflavanone	Flavonoids	Flavanones	2569-77-9	1	9	9	9	108480	139840	47574	161490	350780	222230	1808200	1175000	1214800	3988400	2919000	3449800	4592600	3389300	3453900	5112200	5145700	7147800	1065100	988580	641020	393170	709370	250750	204070	349810	459160	31512	109370	77654	9	21511	20095
mws1002	345.06	330	346.069	C17H14O8	[M-H]-	Syringetin	Flavonoids	Flavonols	4423-37-4	1	9	9	9	26637	22070	11138	39444	66183	43916	555370	523410	323060	937400	578110	799350	2174600	1049300	724080	926180	503510	1098000	9	9	9	16124	12634	8035	14566	43408	10748	2918.6	15356	1220.9	1810.1	6842.2	9812.3
Hmcp003223	347.07	332.05	346.069	C17H14O8	[M+H]+	Limocitrin (5,7,4'-trihydroxy-8,3'-dimethoxyflavonol)	Flavonoids	Flavonols	489-33-8	1	9	9	9	25421	16737	10444	33514	53791	54142	283030	253540	238430	395970	421470	394140	521620	409070	362710	192330	550920	180320	33465	26279	6170.3	12034	20597	5982.7	10137	35480	6580.7	4221.3	18621	3803.8	9	9	9
Hmgp003163	347.08	332.05	346.07	C17H14O8	[M+H]+	3,3',5,7-Tetrahydroxy-4',6-Dimethoxyflavone; (Laciniatin)	Flavonoids	Flavonols	74161-28-7	3	9	9	9	18440	19331	12437	38647	54202	24691	279360	152410	248850	409480	410390	424910	561440	406760	393640	520760	244930	265390	43969	19947	11962	5512.3	19177	2363.4	12342	21925	5502.5	5122.8	10816	1926.5	9	9	9
Lmtn000940	345.08	139.04	346.09	C14H18O10	[M-H]-	1-O-(3,4-Dihydroxy-5-methoxy-benzoyl)-glucoside	Phenolic acids	Phenolic acids	-	2	30420	24279	287240	36518	26757	48342	61761	28153	85922	28739	32271	52543	37273	46321	55812	160020	171180	141880	87683	65854	82300	29179	33710	30966	18479	65980	26475	19156	33558	12090	6201.7	9	8829.2	104240	126620	75114
Lmsp009245	347.11	197.05	346.105	C18H18O7	[M+H]+	3',5-Dihydroxy-4',6,7-Trimethoxyflavanone	Flavonoids	Flavanones	-	3	110380	63145	39341	2062500	1594400	903000	3239300	5209400	2603300	24937000	21051000	10239000	24983000	13621000	14010000	19615000	14621000	14408000	10017000	8838000	9996100	641800	526430	422310	586060	453510	288200	249370	252450	402520	135370	104420	208920	47615	43648	35085
Lmgn002933	345.1	315.05	346.106	C18H18O7	[M-H]-	5,7-Dihydroxy-2',3',4'-trimethoxydihydroisoflavone	Flavonoids	Dihydroisoflavones	-	2	9	9	9	47519	77237	18376	59313	122320	64789	547400	333260	272680	609670	239180	375520	742650	451230	384270	549210	623920	670080	65271	42534	30386	22751	39442	11448	17143	14197	17953	9	9	9	756.7	1899.9	9
Zmnn011624	352.12	322.07	353.126	C20H19NO5	[M-H]-	Honyumine	Alkaloids	Quinoline alkaloids	100595-86-6	2	44343	44188	43140	6300500	7573400	14098000	10661000	6317800	12226000	81733	1165200	2923500	27211	117280	65554	15733	21050	155080	81410	12771	121320	1357.4	2500.7	2755.3	5629.6	42477	2198.9	3156.1	1423.2	3370.7	834.31	778.98	1087.2	725.25	9	1373
mws2108	353.09	191.05	354.095	C16H18O9	[M-H]-	Cryptochlorogenic acid (4-O-caffeoylquinic acid)*	Phenolic acids	Phenolic acids	905-99-7	1	4116.4	1373.6	5820.7	9	9	9	1205.5	13361	1491.1	4957100	2371100	125340	2014600	356500	662630	3808200	2194900	787550	167960	76683	138610	1896300	2026200	2105800	683610	777760	741560	271140	285670	351620	127820	158350	74518	11362	27224	13102
pme1816	353.09	191	354.095	C16H18O9	[M-H]-	Neochlorogenic acid (5-O-caffeoylquinic acid)*	Phenolic acids	Phenolic acids	906-33-2	1	5457	6062.7	10668	4076.9	2455.7	9	1662.7	15569	3471.7	5400500	2510700	125550	2197700	374130	728440	4536600	2478800	925590	169520	90108	150370	1756300	2383400	2480900	808790	860390	851060	278770	245200	395430	143920	170600	98076	12527	19570	11916
mws0178	353.09	191.01	354.095	C16H18O9	[M-H]-	Chlorogenic acid (3-O-caffeoylquinic acid)*	Phenolic acids	Phenolic acids	327-97-9	1	6118.1	4904.5	8788.2	9	9	9	1499.1	6043	1485.1	4215200	1642000	79130	1605400	280300	573580	3656700	2046500	679760	109710	58849	77638	1325000	1521600	1475500	439100	501490	470180	129510	101550	179290	35422	63407	29546	7736.8	10774	9
MWSmce024	355.1	193.05	354.095	C16H18O9	[M+H]+	Scopoletin-7-O-glucoside (Scopolin)	Lignans and Coumarins	Coumarins	531-44-2	1	27452000	28035000	38709000	6339000	3803300	10373000	5216700	2503700	5301500	1341900	2963400	3915400	4899000	4339700	4666300	4653300	3508100	5052000	3727000	3050700	3964800	2223900	456340	1003900	1447800	1442300	1925800	417640	213030	543320	96454	386780	120710	626810	2033400	197830
Zmnn011234	354.13	324.09	355.142	C20H21NO5	[M-H]-	Buntanine	Alkaloids	Quinoline alkaloids	119116-85-7	1	155630	146640	60894	1412400	653400	950290	2831600	1092200	2160400	155690	602600	1661300	120970	1029600	834750	281600	575780	992590	76193	20558	107130	4797.2	2982.6	1954.4	4260.4	5234.3	2172.5	6857.1	3214.3	2533	1700.4	1015	1650	1343.8	1254.5	1220.8
Hmmn002544	355.1	193.05	356.111	C16H20O9	[M-H]-	Ferulic acid-4-O-glucoside	Phenolic acids	Phenolic acids	117405-51-3	2	71338	35263	45091	61513	41428	41623	81857	70445	52943	5680900	2302000	175600	1734700	318510	629910	3490300	2118300	693050	430380	325670	366020	8141200	6617300	11443000	3561000	3764600	3746600	2042700	1450900	2010100	1267200	1511700	1309000	289310	423100	376180
Lmsn003318	355.1	175.04	356.111	C16H20O9	[M-H]-	1-O-Feruloyl-β-D-glucose	Phenolic acids	Phenolic acids	7196-71-6	1	15195	50853	24440	451090	1978300	884610	446140	1904600	1310700	2070300	2630300	1598900	675400	360450	716140	444410	687000	491660	2799100	1299900	4152500	21315000	17181000	30892000	20729000	23881000	28845000	11129000	13988000	13354000	14527000	17089000	14676000	5280500	8482800	7042800
HJAP060	359.12	298.09	358.105	C19H18O7	[M+H]+	Gardenin B	Flavonoids	Flavones	2798-20-1	3	13173	17332	14023	177350	130860	55169	236860	440650	538910	1425500	1539900	1950800	3707800	6125900	6311500	3779600	6469300	7024700	12013000	11340000	14253000	1808400	1122400	1006100	676780	878800	462390	557200	588030	751860	89852	180150	143080	15851	17126	33722
Zmjp010694	359.11	344.09	358.105	C19H18O7	[M+H]+	5-Hydroxy-3,7,3',4'-tetramethoxyflavone (Retusin)	Flavonoids	Flavones	1245-15-4	2	18854	8604.6	2417.1	616650	463190	174460	843180	1495200	1867500	5064600	5216600	6871900	12414000	20048000	20524000	12746000	19930000	23613000	36588000	34510000	44549000	6386600	4269900	3760000	2620700	3248700	1721400	2165000	2237000	2680800	314570	639750	520440	57318	71520	103380
Lmsp010393	359.11	298.09	358.105	C19H18O7	[M+H]+	Eupatorin-5-methylether (3'-hydroxy-5,6,7,4'-tetramethoxyflavone)	Flavonoids	Flavones	21764-09-0	2	39452	15756	10962	1796300	1622400	868860	2842700	3391100	2832400	7761000	6053700	5216700	7038200	5215800	5745900	9245200	7533700	6812700	3786200	3791300	3518100	923510	726100	564850	539510	825900	365980	474970	573270	514960	94967	206030	122970	47951	40812	56251
mws1526	359.13	197	358.126	C16H22O9	[M+H]+	Sweroside	Terpenoids	Monoterpenoids	14215-86-2	2	284460	267360	243440	3982500	1784600	943350	3906700	2765400	1681800	1226900	1098100	4623700	6952700	8354400	6962100	4842600	5781900	5527400	1384100	758780	1409100	1101200	1063100	1140000	1028500	1007800	728720	217560	579730	453040	230800	473220	435790	210240	311250	239220
mws0097	357.13	151.04	358.142	C20H22O6	[M-H]-	Pinoresinol*	Lignans and Coumarins	Lignans	487-36-5	2	103550	190260	560670	40714	11325	9	14047	12984	6437.9	152890	34464	16206	16496	5733.3	10332	23713	9688.8	8468.3	58319	96156	295010	41676	32033	17538	185400	180710	121880	36798	18840	11300	3706.4	6162.1	1154.5	43143	56683	44272
Lmdn004267	357.13	151.04	358.142	C20H22O6	[M-H]-	Epipinoresinol*	Lignans and Coumarins	Lignans	24404-50-0	2	108580	200390	580240	44763	11067	2747.7	14846	10473	7792.8	155130	38249	18215	11538	5110.3	8604.2	25928	9730.3	7608.6	55346	96317	327820	43167	33584	19678	165360	182150	116050	35187	18639	10185	4548.9	7050	1708.7	51306	55801	39012
pmp000788	361.09	346.06	360.084	C18H16O8	[M+H]+	Chrysosplenol D	Flavonoids	Flavones	14965-20-9	2	20097	24229	11406	358820	520760	168080	638560	1055500	709420	3126500	2083500	2467500	5498600	3376400	3865400	6304400	3898400	4161200	8156400	7018100	9435400	830120	588940	324800	291730	426030	141590	148090	255370	239030	20771	61416	40291	15436	16108	16669
Lmxn007955	359.08	329.03	360.085	C18H16O8	[M-H]-	Sudachitin	Flavonoids	Flavones	4281-28-1	2	141530	39988	35960	1946000	2291300	621940	2560100	6330600	4758200	30135000	22395000	22490000	41345000	36615000	38717000	57289000	53777000	58033000	16803000	19500000	20902000	1378800	890710	405730	658710	480280	274750	916660	367670	795050	174960	173600	168830	55609	46284	90451
pmb3107	359.1	182.1	360.106	C15H20O10	[M-H]-	Glucosyringic acid	Phenolic acids	Phenolic acids	-	3	2218900	3180400	2737900	3311600	4761600	4386200	2466700	4077700	3382500	479650	1061400	1368200	76336	75392	62603	63503	54782	54566	22229	15901	23613	89384	104870	111210	249720	296770	313810	203970	200770	195320	44601	67631	47377	485340	534160	403580
Lmsp010098	361.13	197.06	360.121	C19H20O7	[M+H]+	5-Hydroxy-6,7,3',4'-tetramethoxyflavanone	Flavonoids	Flavanones	-	2	38751	38315	33667	9535100	9552200	4022700	19793000	24152000	13632000	59952000	56100000	46196000	58408000	51892000	51566000	55832000	56277000	57868000	45764000	45676000	46518000	4000300	2912400	1767300	1439800	2547800	1070400	1323600	1504900	1872200	155770	378300	279260	51441	50770	119130
Hmmn003964	359.13	197.08	360.142	C16H24O9	[M-H]-	7-Deoxyloganic acid	Terpenoids	Monoterpenoids	22487-36-1	2	9	9	9	9	9	9	9	9	11053	23805	21312	9	9	9	9	11752	15103	29371	45444	76896	42527	260250	222100	158150	374120	297430	259540	222660	166560	173470	50160	70139	81639	9030.2	12386	9
Lmgp003270	369.16	177.06	368.074	C16H16O10	[M+H]+	scopoletin-7-O-glucuronide	Lignans and Coumarins	Coumarins	132752-65-9	1	9	80516	57758	15669	12807	18095	26315	61514	31303	1234300	425280	9	1159700	218850	699950	3313500	1367600	730120	298590	270410	355760	365040	342690	326050	239290	194750	234660	133790	142910	155100	61345	49621	79914	9	9042.9	6079.5
pma0104	369.12	207.1	368.09	C20H16O7	[M+H]+	N-Sinapoylhydroxycoumarin	Lignans and Coumarins	Coumarins	-	3	2307300	2087900	1998400	7247600	4152500	7492100	7835200	5347500	8729000	842100	1653000	3315300	9	9	9	431950	369080	526820	3089100	1556500	3587400	535870	517440	323050	9	9	9	125570	9	124390	54097	34099	80772	356190	324060	375250
pma3724	369.1	177.1	368.111	C17H20O9	[M+H]+	1-O-Feruloylquinic acid*	Phenolic acids	Phenolic acids	-	2	58660	165000	69055	58623	26590	9	57175	113770	19849	5894600	2607600	434980	4943400	1727700	2952100	8496700	4436600	2695600	124740	69423	100220	345330	444960	351870	167180	144110	126330	79789	59560	33745	9655.5	10849	28924	5788.8	9	2198.9
pmb0752	369.12	177.1	368.111	C17H20O9	[M+H]+	3-O-Feruloylquinic acid*	Phenolic acids	Phenolic acids	1899-29-2	1	22342000	26819000	16402000	1286900	741240	197340	1031900	3447400	1466000	45751000	37331000	16780000	42587000	42798000	38206000	36450000	35604000	33648000	9304300	8708900	10404000	34267000	42510000	39372000	24270000	18318000	21274000	11285000	10171000	11220000	3066200	4453900	3244300	59136	145440	141290
Lmbp002255	371.1	209.05	370.09	C16H18O10	[M+H]+	Fraxetin-8-O-glucoside (Fraxin)	Lignans and Coumarins	Coumarins	524-30-1	2	179590	83224	203620	60053	144010	114230	239480	135000	313330	43410	119740	41718	198490	211120	211440	192680	186940	197950	9	9	9	9	9	9	9	9	9	9	9	9	9	9	9	9	9	9
pmp000365	371.11	315.08	370.105	C20H18O7	[M+H]+	Uralenol	Flavonoids	Flavonols	139163-15-8	2	96934	56591	42381	505980	364620	330520	528340	218920	210010	12482	12439	43481	3302.2	1532.2	1040.2	9	9	9	1517.5	9	1775.7	9	9	9	9	9	9	9	9	9	9	9	9	9738.5	8474.7	3958.7
Lmbp002309	371.1	209.05	370.126	C17H22O9	[M+H]+	Sinapaldehyde-4-O-Glucoside	Phenolic acids	Phenolic acids	154461-65-1	2	179590	83224	203620	60053	144010	114230	239480	135000	313330	43410	119740	41718	198490	211120	211440	192680	186940	197950	9	9	9	9	9	9	9	9	9	9	9	9	9	9	9	9	9	9
pmb3317	371.1	179.1	372.106	C16H20O10	[M-H]-	Quinacyl syringic acid	Phenolic acids	Phenolic acids	-	3	45054	41919	49455	32171	18224	14418	38525	18446	17608	263950	249410	144030	170710	136320	118400	319190	429710	378120	118110	58140	61796	42462	61971	68083	9	9	9	76049	80830	112280	118410	169030	137500	232050	185000	153180
mws1313	373.13	312.1	372.121	C20H20O7	[M+H]+	Sinensetin (5,6,7,3',4'-pentamethoxyflavone)*	Flavonoids	Flavones	2306-27-6	1	6168.3	7244.7	2829.7	621400	619390	355440	999900	1252500	963260	4378300	3207700	2588300	4993400	3818500	4004000	6198500	5211100	4557000	8883300	9460700	8426600	961020	817650	536240	648560	811110	390290	653780	660850	579040	153360	229350	159740	59828	38534	87026
Lmcp007155	373.13	343.08	372.121	C20H20O7	[M+H]+	3',4',5',5,7-Pentamethoxyflavone	Flavonoids	Flavones	53350-26-8	2	3743.7	1310.1	9	169500	167340	91769	318110	353230	284480	1112000	832110	605520	1568900	1061900	1195500	2286800	1770800	1438000	2013000	1917600	1928800	247770	172300	156780	142780	209280	85313	110350	131000	136960	17111	43202	20393	5924	10532	9207.6
pmp001076	373.13	343.08	372.121	C20H20O7	[M+H]+	Isosinensetin	Flavonoids	Flavones	17290-70-9	1	3319.9	1555.8	1107.9	188410	160720	92643	327120	345550	279000	1132200	819690	626550	1626500	1112800	1120800	2163900	1699700	1399800	1983100	1992300	1914200	237830	193150	151620	133420	183590	90344	129500	144710	126200	19440	41081	25182	9522.5	6626.5	12137
MWSHY0027	373.13	343.09	372.121	C20H20O7	[M+H]+	Tangeretin (4',5,6,7,8-Pentamethoxyflavone)*	Flavonoids	Flavones	481-53-8	1	14203	17194	13380	643420	434740	251220	780820	1280600	1188700	3927400	3151700	3077600	6535800	7049400	7287500	6342400	7749700	7810700	11470000	11218000	12019000	2382100	1621100	1216700	1105700	1710900	880030	1068900	1110600	1164800	259960	415400	317660	73069	74530	128070
Hmhp008730	373.17	203.04	372.157	C21H24O6	[M+H]+	6',7'-Dihydroxybergamottin	Lignans and Coumarins	Coumarins	145414-76-2	3	9	9	9	9	27314	17167	9	9	2179.2	10417	9	9	9	9	9	9	9	9	55302	9	9	36433	15651	20542	590760	9	10948	1195300	271270	63746	625250	113300	25537	112560	14021	18296
pmb0108	375.2	137.1	374.1	C19H18O8	[M+H]+	Feruloyl syringic acid	Phenolic acids	Phenolic acids	-	3	33970	10555	30846	71627	9	29420	9	34213	9	1058800	491690	172330	1739700	232280	701600	2454000	709010	472270	536310	100400	321520	62981	38200	52167	104280	40854	176590	44245	22998	52923	45363	41237	42339	9	9	9
Zmjp006442	375.11	342.07	374.1	C19H18O8	[M+H]+	Chrysosplenol G	Flavonoids	Flavones	-	2	9	9	9	13535	15759	8434.4	21066	62372	33435	691170	398330	173120	669540	309960	399070	1114900	662630	353990	285740	334300	311480	20092	15687	11645	8088.1	18114	9	9	12200	11367	9	9	9	9	9	9
Zmhp004269	375.11	360.08	374.1	C19H18O8	[M+H]+	Skullcapflavone II	Flavonoids	Flavones	55084-08-7	2	124400	46766	45040	3587000	5758900	2334600	4370100	8134600	6188600	15286000	12273000	14084000	18093000	12379000	15258000	22498000	15147000	12082000	6228400	7231200	8252400	3567400	3134600	2288300	2289700	2774200	1231800	1439400	1794000	1694900	339570	817970	593400	127520	224380	196100
Hmmp007513	375.11	345.06	374.1	C19H18O8	[M+H]+	5,7-Dihydroxy-6,3',4',5'-tetramethoxyflavone (Arteanoflavone)	Flavonoids	Flavones	68710-17-8	2	191530	86099	62925	5801700	8833700	3951800	6848500	11882000	9878000	25118000	19743000	23548000	31732000	21431000	25115000	36230000	24870000	21821000	11078000	12661000	14607000	5521100	4875700	3501100	3507000	4641600	2045200	2288900	2797400	2665900	528260	1238300	971420	226700	343230	318510
Jmbp005771	375.11	345.06	374.1	C19H18O8	[M+H]+	Gardenin D	Flavonoids	Flavones	29202-00-4	2	9	9	9	621730	658710	332590	828030	1112700	924960	2573200	2407700	2186400	3495000	1928900	3143200	3639200	2818500	2506300	4351300	4136600	4379500	534760	636240	313040	346950	501880	213480	366190	362870	300860	82486	135200	73307	33289	24855	45781
MWSHY0152	375.11	342.07	374.1	C19H18O8	[M+H]+	Casticin (5,3'-Dihydroxy-3,6,7,4'-Tetramethoxyflavone)	Flavonoids	Flavones	479-91-4	3	51063	21752	11951	1317200	2313600	932170	1753800	3051300	2357700	6072100	4857400	5613100	7753100	5227400	6269000	9433100	6242100	4907800	2480600	2810500	3183100	1411600	1190300	834300	856840	1146700	504010	542030	702650	649440	125560	285700	222010	52643	78960	76660
pmp000695	375.13	177.05	374.121	C16H22O10	[M+H]+	Swertiamarin	Terpenoids	Monoterpenoids	17388-39-5	3	9	9	9	66277	129710	31484	119840	272840	162250	1875300	1445000	1058000	516080	326250	379810	761240	479910	350590	155260	163870	91888	25808	9	9	37801	45357	51889	9	9	9	9	9	20343	15251	9	9
Lmjp003722	375.14	357.13	374.124	C20H22O7	[M+H]+	2'-Hydroxy-3,4,5,4',6'-pentamethoxychalcone	Flavonoids	Chalcones	-	3	88175	56677	90837	72098	46762	22741	81239	121200	67765	424190	294720	232380	381570	283060	314310	310350	325620	318530	216980	242050	208510	19255	11187	10166	19375	10208	9701.4	42642	11178	26989	13366	16850	8984.8	87391	99424	103720
Hmxp007703	375.14	211.06	374.137	C20H22O7	[M+H]+	5,7,8,3’,4’-Pentamethoxyflavanone	Flavonoids	Flavones	-	1	14450	13496	5250.9	1047000	840170	406250	1800000	2422100	1375700	9477800	7416000	5674900	8746300	5908800	6702900	6915000	7283200	6919700	5239800	5673300	4310800	325700	238200	125660	157340	259680	89241	235020	194040	188490	29872	39939	33088	33034	11115	29139
Lmzn001983	375.13	135.05	376.137	C16H24O10	[M-H]-	D-Threo-guaiacylglycerol-7-O-β-D-glucoside	Phenolic acids	Phenolic acids	-	2	9	9	9	44081	29746	21703	20502	22048	41519	9	9	9	41894	20750	37700	33232	16540	25953	9042.8	9554.5	17034	77639	81106	120520	72760	81869	99491	36115	24534	36615	8914.6	8512.6	11415	8617.3	13317	9538.8
Lmjp003090	385.11	223.06	384.106	C17H20O10	[M+H]+	Isofraxidin-7-O-glucoside	Lignans and Coumarins	Coumarins	483-91-0	2	2241700	3123300	6263500	830630	587210	2851200	772180	809700	972030	62683	78491	208700	422170	159120	120800	357180	96361	115730	365120	308550	385560	206650	199460	137330	134670	186890	102780	14090	73313	84525	51412	107170	90596	34132	51127	33969
pmb2940	385.11	205	386.121	C17H22O10	[M-H]-	1-O-Glucosyl sinapate	Phenolic acids	Phenolic acids	78185-48-5	3	216010	177280	278210	3406500	4316800	3422300	2760800	5184100	6796300	9667200	9480200	7529200	3375600	1975000	4624800	2459100	2276200	3294800	4815600	3047700	7370900	14541000	16018000	15198000	25054000	29732000	32470000	16334000	18538000	20665000	7330900	9248400	9407400	9388600	15220000	9712600
Zmhn002227	385.11	223.06	386.121	C17H22O10	[M-H]-	Sinapoyl-4-O-glucoside*	Phenolic acids	Phenolic acids	-	2	322420	938000	524770	1815300	1183100	2924200	1102000	1169200	1374300	505230	545420	653280	709360	267980	384090	608320	344060	415360	177920	116330	641040	316580	278350	253700	468490	310170	402930	186530	179980	171150	84065	101380	109220	5129800	5679900	4588400
HJN003	385.11	223.06	386.122	C17H22O10	[M-H]-	1-O-Sinapoyl-D-glucose*	Phenolic acids	Phenolic acids	-	2	68238	9	66201	699800	951440	803420	691790	1040000	1558200	1672900	1659000	1687900	1107400	657910	1032800	578600	714840	1002500	711450	363140	1066500	2119300	2652900	2161600	3172800	4034200	5088000	2391900	2553500	2984000	1063300	1177100	1378600	1173100	2343100	1153900
Lmqp003013	387.2	149.1	386.194	C19H30O8	[M+H]+	Citroside A	Terpenoids	Terpene	120330-44-1	2	9	9	9	9	9	9	9	9	9	21843	32836	53615	150540	203310	191470	116120	120150	205030	963610	901960	943140	1294800	1301500	1802800	1300200	1053400	1189300	853080	656200	700750	522890	394780	506180	45419	68237	52343
pmn001423	385.19	223.13	386.194	C19H30O8	[M-H]-	Roseoside	Others	Others	54835-70-0	2	79911	80374	104310	1253100	1418000	1166800	955590	1970600	2582500	3306500	3076200	2545200	1435300	1040900	1702800	1416000	751600	1413700	1790000	1161000	2091800	4527100	4834900	4244100	6815400	8174400	10031000	5059100	5461200	5851800	2306100	2685500	2838400	2658400	5146800	2705700
pmp001161	389.12	328.1	388.116	C20H20O8	[M+H]+	5-Hydroxyauranetin	Flavonoids	Flavonols	50439-46-8	1	79864	48427	33760	8245700	7906300	4191600	10958000	15510000	13909000	34072000	29884000	29492000	44178000	41993000	43533000	49143000	48586000	49173000	46991000	47761000	48678000	10142000	7713500	5958900	4896500	6912300	3547500	4416800	4708600	4790500	830690	1703600	1151300	245630	247860	359540
Jmbp006554	389.12	359.07	388.116	C20H20O8	[M+H]+	ethyl rosmarinate	Phenolic acids	Phenolic acids	-	2	3842.4	1498.4	1372.3	289960	273930	141880	394220	522840	481570	1338900	1123400	1053900	1846900	1801600	1860900	2092500	2228700	2232500	1980400	2131100	2196200	326660	249650	193500	156470	210580	108730	141260	150930	160000	28648	51750	35779	8443.7	7978.3	12600
MWSslk185	389.12	359.08	388.368	C20H20O8	[M+H]+	Demethylnobiletin	Flavonoids	Flavones	2174-59-6	2	3336.1	2190.8	1630.6	311210	282800	148580	420380	587670	522300	1446200	1201200	1190600	2049300	1920700	2082200	2343700	2377700	2416200	2168200	2331100	2381000	357490	274050	209790	169170	243430	119610	154200	169240	169460	32636	56866	35802	7262.1	4824.4	11461
Jmbp005434	391.1	361.05	390.095	C19H18O9	[M+H]+	Gardenin E	Flavonoids	Flavones	29550-07-0	2	9	9	9	143120	112480	56632	248510	351820	277310	1810000	1151800	1015300	2554600	1856100	1981700	2985800	2654500	2439900	3122500	3111800	2996200	297760	239110	153190	158310	267070	85552	126220	176060	151100	17666	38610	21128	8207.5	6781.3	10920
Smnn004416	389.19	374.17	390.204	C22H30O6	[M-H]-	Pregomisin	Lignans and Coumarins	Lignans	66280-26-0	2	9	9	9	7802.1	6838.4	1939.6	10932	19916	16245	114500	76761	93109	206350	172740	157160	213730	210240	220850	242590	228360	241580	8640.7	5100.9	3575.3	2823.8	3962.1	1362.6	2055.7	2147.5	2132.1	9	9	9	9	9	9
pma0110	399	207.2	398.121	C18H22O10	[M+H]+	4-O-Sinapoylquinic acid	Phenolic acids	Phenolic acids	-	3	2252400	2177800	952240	108300	78983	82032	126020	239410	192660	3379200	1517600	732400	416330	229340	417120	240880	186670	210140	538000	357500	416370	693800	870210	900980	1480700	1756600	1907600	3048100	3124400	3049700	626790	715060	486640	9105.9	25955	20298
Lmhn002573	399.09	205.04	400.101	C17H20O11	[M-H]-	Sinapoylglucuronic acid	Phenolic acids	Phenolic acids	-	1	268150	308330	275530	4805200	5575100	9304100	14213000	8676600	14083000	10477000	9211800	9783000	25612000	11057000	4370400	5343100	16102000	15133000	11058000	5448000	5474000	11568000	22278000	20823000	17604000	17303000	25281000	9	9	9	9	9	9	1286000	2762000	1728700
Cmbp005948	401.12	163.04	400.116	C21H20O8	[M+H]+	1-O-p-Hydroxycinnamoyl-3-O-caffeoylglycerol	Phenolic acids	Phenolic acids	-	2	27775	21443	9	9	9	9	9	9	9	9	9	9	50531	20334	70558	20774	23085	159540	364450	450560	529200	525460	585860	1225200	630490	740290	1825500	253830	840780	972720	90247	232860	198530	32353	78083	25738
MWSHY0018	403.14	373.1	402.131	C21H22O8	[M+H]+	Nobiletin (5,6,7,8,3',4'-Hexamethoxyflavone)	Flavonoids	Flavones	478-01-3	2	28172	27897	22256	1507900	1286500	809380	2132800	2721100	2493100	6785000	5434500	4929600	7427100	6495800	6509800	8568800	7245900	7467800	9063800	9151900	8964900	2252900	1729500	1305900	1260200	1763100	884400	1046700	1356000	1091600	264810	469100	303920	150510	136610	226280
Jmbp005971	405.12	375.07	404.111	C20H20O9	[M+H]+	Gardenin C	Flavonoids	Flavones	29550-05-8	2	186510	193480	167020	10024000	9060200	5749200	15138000	18624000	15992000	33407000	39081000	34199000	50024000	44383000	44153000	43521000	51232000	50122000	59771000	59360000	58810000	15844000	12302000	10228000	8687000	12795000	6167000	8777500	9422800	9154000	1893500	3230600	2234800	1054400	1046500	1451900
pmp000114	405.15	241.1	404.147	C21H24O8	[M+H]+	5,6,7,8,3',4'-Hexamethoxyflavanone	Flavonoids	Flavanones	-	1	22573	16211	19993	17673000	15524000	8167800	30855000	32057000	22281000	38405000	48202000	48898000	45322000	41041000	33382000	38895000	29826000	33818000	23353000	22916000	24074000	1713800	1338000	801840	575550	995730	426020	401200	605790	746310	56816	177450	116120	21947	22384	43806
Lmlp002038	408.13	246.08	408.13	C19H21NO9	[M+H]+	Glycohaplopine	Alkaloids	Quinoline alkaloids	74201-15-3	2	1264700	843630	2201000	106460	27553	89706	97855	49578	133590	36996	33822	142590	142120	78932	175590	95112	56004	173310	9	9	9	250550	101010	343340	329960	170010	751720	63008	20112	88662	10978	14074	18284	9	9	9
Hmhp002580	413.14	136.07	412.133	C19H24O10	[M+H]+	Methylpicraquassioside A	Lignans and Coumarins	Coumarins	-	2	2227300	2178300	3230700	1848200	1833100	2381800	2515300	2592500	2676600	1951500	2633100	3238700	3342700	4938700	3839400	3528700	3945700	4393200	1670700	1604900	1737500	1260000	1444900	1472700	2415700	2303700	2363100	1153100	1245200	1024900	556560	727800	668510	915330	878420	789600
HJAP012	419.1	383.07	418.09	C20H18O10	[M+H]+	Luteolin-8-C-arabinoside	Flavonoids	Flavonoid carbonoside	-	2	9	9	9	9	9	9	9	9	9	14742	11272	21476	9	9	9	26347	20664	15967	70008	26492	44895	630040	434860	435830	652220	671700	1250600	604510	564120	639460	385730	404230	570920	70693	53527	50569
Hmxp008844	419.13	404.11	418.126	C21H22O9	[M+H]+	Gardenin A	Flavonoids	Flavones	21187-73-5	2	45533	16365	15247	765820	698320	369250	789610	1368300	684970	6668100	3752500	1499600	4037500	2456400	1736300	3555800	1983200	1414300	1328000	1096900	1078700	486770	242460	108620	487310	295620	118470	750250	530760	335650	273110	240700	124320	64375	47714	88294
pmn001551	417.12	402.07	418.126	C21H22O9	[M-H]-	Natsudaidain (3-Hydroxy-3',4',5,6,7,8-hexamethoxyflavone)	Flavonoids	Flavonols	35154-55-3	1	9351.5	6959.2	14738	60551	36948	13560	82133	231100	88642	3160800	1407500	766510	2760900	2904300	2090600	4187100	2383300	2100200	6100900	5942600	5254500	143030	58285	21758	56679	53364	11009	89002	77797	49504	5878.8	11291	3952	1970.5	1384.6	2617.3
pmp000383	419.13	257.08	418.126	C21H22O9	[M+H]+	Liquiritigenin-4'-O-Glucoside (Liquiritin)*	Flavonoids	Flavanones	551-15-5	3	28975	8484.2	37146	260770	236580	53783	260230	489740	256160	1019100	1043300	1432700	261230	291330	441010	268380	366730	283380	392350	311150	315990	417470	359640	352210	815450	779890	998570	883150	623310	739480	409430	351970	690750	2089900	2643500	1374400
MWSslk181	419.13	257.09	418.126	C21H22O9	[M+H]+	Isoliquiritin*	Flavonoids	Chalcones	5041-81-6	3	26732	12321	32310	242810	181450	41144	378480	502130	222270	1018200	864810	1255600	206510	258690	292940	188500	364080	264730	370980	245500	272370	484920	411650	401100	767600	570500	884730	909740	452000	860500	428690	891920	688930	1254800	2926300	9
pma6218	419.1	383.1	418.126	C21H22O9	[M+H]+	O-MethylNaringenin-8-C-arabinoside	Flavonoids	Flavonoid carbonoside	-	3	9	9	9	54302	49107	53667	45544	31222	87788	83252	98957	103530	96483	103240	70232	78959	102690	87331	459050	113520	346950	2454100	2570200	3844600	4642200	5084300	5245300	4687400	3146600	3040300	3932000	3029000	3496000	342650	214100	253870
Hmcn002743	417.15	181.04	418.162	C22H26O8	[M-H]-	Lirioresinol A	Lignans and Coumarins	Lignans	-	2	10221000	2756500	14695000	1093400	239940	595660	269320	249330	737280	491310	366930	242540	95128	26210	26768	160290	38432	20635	571740	433020	1080100	82953	154470	179020	929760	243560	516800	76178	74601	305350	13104	19058	8975.9	62530	114860	50093
mad1424	427.05	295.05	426.043	C17H14O13	[M+H]+	Ditartaroyl-hydroxycoumarin	Lignans and Coumarins	Coumarins	-	3	800860	800730	1093500	659430	629360	774820	842180	657720	848490	614310	736130	755150	700180	1070500	836060	643480	792450	1025700	344410	287850	384690	378820	386100	397920	535380	616170	651010	311880	316930	320720	147800	137300	200930	342950	351290	310860
MWSHY0008	433.11	283.06	432.106	C21H20O10	[M+H]+	Isovitexin	Flavonoids	Flavonoid carbonoside	38953-85-4	2	12299	8288.2	8649.2	51277	94954	48349	75964	296100	157080	6969700	3400800	2105000	36671000	10602000	24614000	41203000	33027000	13495000	6962600	5519100	8495400	154240	107300	98277	137920	93610	75212	971340	829630	837080	596680	878380	780780	110180	138920	92348
mws0048	431.1	311	432.106	C21H20O10	[M-H]-	Apigenin-8-C-Glucoside (vitexin)*	Flavonoids	Flavonoid carbonoside	3681-93-4	3	29061	14681	8867.3	106370	198160	72367	217550	499680	351790	8097200	4169100	2809000	27121000	6850600	14584000	30753000	22877000	8435100	7638200	10318000	10715000	282770	307220	194270	303920	257340	173950	4290400	3665400	3505700	2142600	3581100	3200100	25248	7727.6	8344
pme0321	431.1	285	432.106	C21H20O10	[M-H]-	Kaempferol-7-O-rhamnoside*	Flavonoids	Flavonols	20196-89-8	3	22257	38076	42323	26038	52824	8765.4	99655	189330	74218	35756	317830	237960	100410	313700	190230	180570	206280	299410	10960	10569	9771	8683.4	5348.5	4966.7	11946	11349	9425.4	2418.8	3366.3	5983	9	9	9	5608.4	2566.6	2901.8
mws0919	431.1	285	432.106	C21H20O10	[M-H]-	Kaempferol-3-O-rhamnoside (Afzelin)(Kaempferin)*	Flavonoids	Flavonols	482-39-3	3	24255	34099	7583.5	30111	59138	10568	134740	238410	87933	41971	400560	262630	114640	383150	242160	185980	252080	368720	10404	9846.5	14766	10448	5484.1	5902.6	22186	13035	10733	2620	857.09	7573.9	588.95	1210.6	1750.7	7893.1	3498.5	4057.1
mws1434	431.1	311	432.106	C21H20O10	[M-H]-	Apigenin-6-C-glucoside (Isovitexin)	Flavonoids	Flavonoid carbonoside	29702-25-8	1	25565	8689.9	8965.5	129600	220290	60085	226470	544080	353750	9047300	4182600	2688900	29630000	7558500	16220000	30607000	19642000	7297100	9963200	10014000	10236000	278690	286020	163550	305260	263180	171900	5026000	3728100	3602600	2387800	3538100	3096000	29622	22260	7822.8
pmp000413	433.11	283.06	432.106	C21H20O10	[M+H]+	Genistein-8-C-glucoside	Flavonoids	Isoflavones	66026-80-0	1	17771	10406	6650.3	92932	159520	45990	160740	513630	200950	12612000	6623100	3825900	39035000	22097000	35819000	49097000	41111000	21672000	11078000	8975000	12863000	213190	231660	166800	220310	169250	127610	3140400	1814000	1973200	1229400	1642900	1529800	228970	280510	156960
MWSHY0189	433.11	271.07	432.106	C21H20O10	[M+H]+	Apigenin-7-O-glucoside(Cosmosiin)	Flavonoids	Flavones	578-74-5	3	9	12497	24865	9	9	9	19668	24214	28245	140420	65609	45689	5278500	1761000	3255500	10184000	3342200	2412300	149600	78630	131600	9	9	9	14061	13775	16988	23433	21477	13838	17968	34004	30913	345780	144010	165240
pmp000117	433.15	403.11	432.142	C22H24O9	[M+H]+	3,5,6,7,8,3',4'-Heptamethoxyflavone	Flavonoids	Flavonols	1178-24-1	1	9	9	9	165810	145100	93302	436850	574960	327050	2758300	1868000	1100300	3052800	1544200	1308700	3407900	2083200	1856700	13663000	14408000	13989000	2066800	1557200	938850	1175300	1619200	590250	1364000	1258200	1068300	385150	441770	228440	66131	72343	126010
MWSHY0100	435.09	303.06	434.085	C20H18O11	[M+H]+	Avicularin	Flavonoids	Flavonols	572-30-5	3	9	9	9	9	9	9	9	9	9	480610	280450	174780	278190	126340	308230	653830	381630	329490	545040	175860	715390	9	9	11223	9	9	20692	9	13056	8494.9	1922.3	9	12189	17005	9	9
Lmdp003509	435.09	303.06	434.085	C20H18O11	[M+H]+	Quercetin-3-O-xyloside (Reynoutrin)	Flavonoids	Flavonols	549-32-6	3	9	9	9	9	9	9	9	9	9	480610	280450	174780	278190	126340	308230	653830	381630	329490	545040	175860	715390	9	9	11223	9	9	20692	9	13056	8494.9	1922.3	9	12189	17005	9	9
HJN087	433.12	271.06	434.121	C21H22O10	[M-H]-	Naringenin-4'-O-glucoside*	Flavonoids	Flavanones	-	1	9	9	9	17993	13334	13933	10732	20228	19346	105090	73985	35550	715150	357620	409120	2306500	936160	393630	127300	30590	89931	751400	393340	1146100	437030	203020	646910	65896	67827	51482	20746	43352	20532	16994	9	10278
mws1179	433.11	271	434.121	C21H22O10	[M-H]-	Naringenin-7-O-glucoside (Prunin)*	Flavonoids	Flavanones	529-55-5	1	9	9	9	9	9	9	9	9	9	9	9	9	127550	36157	56590	234330	90683	60258	21143	9	19717	126730	40645	152200	98747	37496	123630	12756	27632	17488	12190	37326	8507.7	23354	20778	4271
Cmzn005251	433.11	271.06	434.121	C21H22O10	[M-H]-	6-O-Caffeoylarbutin	Phenolic acids	Phenolic acids	136172-60-6	3	9	9	9	33750	34235	16179	9	9	9	670620	265520	24866	9	9	9	9	9	9	323520	254550	380420	7472500	7229900	9614100	4445200	5357800	5413100	1719500	1407000	2233600	488980	553680	617060	77629	62973	61399
pma0724	435.13	285.1	434.121	C21H22O10	[M+H]+	Naringenin-6-C-Glucoside	Flavonoids	Flavonoid carbonoside	-	3	5813.2	9	21783	27121	18706	30262	67849	24778	47787	230710	120710	91016	1276100	335310	667650	1439100	955840	420380	183940	146690	232740	70558	61860	169100	45704	80669	75088	44463	21911	34186	23729	29438	22704	22138	9	12408
HJN090	433.11	271.06	434.121	C21H22O10	[M-H]-	Butin-7-O-glucoside	Flavonoids	Flavanones	-	2	9	9	9	9	9	9	18173	18302	26180	147040	71830	47777	1034000	390550	495670	2276900	1100100	521810	189360	47474	170020	1303000	348630	1322600	609440	306960	777640	65778	91217	101570	57390	93488	37235	29293	38710	9
pme1611	433.11	313	434.121	C21H22O10	[M-H]-	Isohemiphloin	Flavonoids	Flavonoid carbonoside	-	2	9	9	9	9	9	9	38356	20996	10421	340130	179120	129170	1065100	260340	559790	1257500	675410	317070	355630	351240	426310	334240	322950	426060	211750	233530	268900	283840	190250	258490	129310	166560	146860	9	9	9
Lmlp006175	435.13	273.09	434.121	C21H22O10	[M+H]+	Isosalipurposide (Phlorizin Chalcone)	Flavonoids	Chalcones	4547-85-7	3	38389	40954	68881	27271	24533	10202	17823	46347	60779	59213	104410	132280	603850	338330	413520	966480	410200	231220	100490	26475	108240	650420	204690	745740	369200	231000	551790	270690	187090	235170	100860	106060	102270	138340	66456	34430
HJN055	435.13	273.08	436.136	C21H24O10	[M-H]-	Dihydrocharcone-4'-O-glucoside	Flavonoids	Chalcones	-	3	9	9	9	51463	17957	19961	20050	46648	62044	48835	58597	9	510040	146020	239450	882300	339680	263770	78103	9	9	641910	193670	704410	407310	195840	372280	202120	9	109620	9	9	9	117940	59361	9
mad2116	441.08	295.05	442.09	C22H18O10	[M-H]-	Bis(p-Coumaroyl)tartaric acid	Phenolic acids	Phenolic acids	-	2	715460	1067000	415660	118020	430840	145210	313880	338410	228510	88186	474380	128620	62869	118130	110740	67690	68273	57653	5912.4	4617.5	3464	303950	257090	288500	521740	355280	857030	57653	11538	42106	2293.2	7501.2	3462.5	2337.5	2359.3	1157
pmp000573	447.13	285.08	446.121	C22H22O10	[M+H]+	Acacetin-7-O-galactoside	Flavonoids	Flavones	-	2	3876.6	1709.6	13642	9	9	9	9	9	9	9	9	9	58950	20760	51227	52717	25151	43475	7467.2	7469.8	11422	9	9	9	9	8520	9	9	9	9	9	9	9	9	9	9
Hmcp002316	449.11	317.06	448.1	C21H20O11	[M+H]+	Isorhamnetin-3-O-arabinoside	Flavonoids	Flavonols	-	3	9	9	9	15282	9086.4	1259.7	12945	29100	19021	360800	195230	109920	201240	197250	213850	727100	430040	271510	83685	43591	93929	3929.6	9	1861.5	9	2151.5	9	5888.6	7110.4	6857.7	9	9	715.01	45167	48334	43198
mws1299	449.11	299.2	448.101	C21H20O11	[M+H]+	Luteolin-8-C-glucoside (orientin)*	Flavonoids	Flavonoid carbonoside	28608-75-5	1	20415	26863	13770	84612	423270	113220	168470	655650	308400	8700300	4467900	3058000	8170700	3707600	6325200	12474000	13265000	5584000	14662000	15441000	29520000	306610	102120	34023	137010	107260	81888	391810	294150	320910	104030	86905	71226	21803	65741	10734
mws0045	449.11	303.05	448.101	C21H20O11	[M+H]+	Quercetin-3-O-rhamnoside(Quercitrin)	Flavonoids	Flavonols	522-12-3	2	9796.9	5813.3	8023.2	1263600	680480	276200	1097500	2705800	2526000	3584000	3074300	6045700	3007300	3679100	5455800	4796400	4252700	4652600	4086900	4205900	3204000	3571600	4835400	3337300	4955600	4632200	4443900	5275300	4750900	4578600	3618700	4686100	5674600	600330	1199800	584640
mws0089	447.09	285.04	448.101	C21H20O11	[M-H]-	Kaempferol-7-O-glucoside	Flavonoids	Flavonols	16290-07-6	3	9	9	9	9	24303	11561	9	9	9	145380	146540	189100	476690	273190	683850	684830	482420	634150	254600	119860	998200	9	9	9	9	9	9	9	9	9	9	9	9	744550	116650	231450
mws1608	447.09	357.1	448.101	C21H20O11	[M-H]-	Luteolin-6-C-glucoside (Isoorientin)*	Flavonoids	Flavonoid carbonoside	4261-42-1	1	52900	10718	16487	183910	472640	124340	232580	772220	323630	4142400	3136000	1475400	3977200	2537600	2970800	8227000	5643000	3312400	11283000	13080000	24313000	359370	161090	99399	68207	55522	63541	569950	366420	328730	121630	113180	112110	20948	24686	27240
MWSHY0104	449.11	287.06	448.101	C21H20O11	[M+H]+	Luteolin-7-O-glucoside (Cynaroside)	Flavonoids	Flavones	5373-11-5	2	65848	41134	57617	9	9	9	9	9	52980	316020	137100	159620	1512800	397750	598030	1840300	643110	522190	4222400	4117200	3988700	3248200	3865000	3658100	2969000	3611700	4068500	7324700	6679700	7280300	7303200	7246900	7049400	3305500	3511500	2307700
HJN086	449.11	287.06	450.116	C21H22O11	[M-H]-	Eriodictyol-3'-O-glucoside*	Flavonoids	Flavanones	-	2	12973	6788.1	7747.5	120380	191730	134440	147840	135000	140700	148700	179440	109870	675500	428570	1041200	1960400	1089000	727010	190730	45987	147420	154150	144190	183760	116170	70630	110070	136040	54826	72873	13063	11923	10224	20165	18623	30657
mws1361	449.11	151	450.116	C21H22O11	[M-H]-	Taxifolin-3-O-rhamnoside (Astilbin)	Flavonoids	Flavanonols	29838-67-3	2	9	9	9	56472	86827	37608	57030	40763	58871	12896	15819	23318	42236	19919	20505	106010	47238	40220	47923	14366	36010	53432	41585	85578	81549	75276	114160	73936	68114	96172	33573	31079	26232	9	9	9
mws0057	451.12	289	450.116	C21H22O11	[M+H]+	Eriodictyol-7-O-glucoside*	Flavonoids	Flavanones	38965-51-4	2	9	9	9	85091	76179	9	79762	186600	9	218110	233610	112860	162150	137630	92318	132720	178940	245990	108270	175260	121120	522980	432150	706910	436740	421670	589230	445910	442690	548820	500770	437370	466610	9	9	9
pmb3023	449.11	287	450.116	C21H22O11	[M-H]-	Eriodictyol-8-C-glucoside	Flavonoids	Flavanones	1023271-51-3	3	9	9	9	5667.5	13461	6747.9	9	9	9	700590	263600	122150	1136600	420100	527500	3534400	1638400	773670	190990	138310	141330	58768	62640	9	112810	48079	71591	184460	84077	136290	10820	60994	75805	1724300	1514100	1111400
Lmtn002796	449.1	287.05	450.116	C21H22O11	[M-H]-	Aromadendrin-7-O-glucoside	Flavonoids	Flavanonols	28189-90-4	2	9	9	9	9	9	9	9	9	9	459760	283600	121270	1043600	321290	392150	2465600	1578600	646700	234060	233500	139210	69394	65119	77661	134380	65144	192360	469510	174930	323210	186810	252350	283830	4887100	4457800	3646700
Lmmn004625	449.11	287.06	450.116	C21H22O11	[M-H]-	Dihydrokaempferol-7-O-glucoside	Flavonoids	Flavanonols	-	2	18030	10989	18014	74281	186400	122030	147730	111020	122470	111370	203090	145380	575470	468280	761450	1514800	871480	930830	148170	52200	164860	162160	132270	211020	109460	106090	114940	58988	51350	60465	32061	14422	4806.9	59266	36381	9687.6
Lmsp004301	451.12	289.07	450.116	C21H22O11	[M+H]+	3',5,5',7-Tetrahydroxyflavanone-7-O-glucoside	Flavonoids	Flavanones	-	2	9	9	9	9	103340	9	9	9	9	365700	345540	408550	482140	709440	230330	276340	796290	283120	264530	347090	227710	1235900	896400	1014100	754970	598870	917600	963380	888100	991470	891180	1074100	988320	9	9	9
Jmgn004021	449.11	269.05	450.116	C21H22O11	[M-H]-	6-C-Glucosyl-2-Hydroxynaringenin	Flavonoids	Flavanones	-	2	9	9	9	9	9	9	9	9	9	154810	74346	38754	329710	100370	141410	858510	439760	176020	57419	51840	37794	9	9	9	44375	24522	114360	313520	92222	237260	167590	138920	177950	3182200	3005900	2636200
Zmdn002049	451.13	289.07	452.132	C21H24O11	[M-H]-	Epicatechin-4'-O-β-D-glucopyranoside*	Flavonoids	Flavanols	-	2	9	13059	9	9	9	16936	15448	13788	37889	9932.4	16349	19402	9	15978	11045	9	10587	14764	9	9	9	19511	20041	15103	9	9	9	9	9	9	9	9	9	9	20073	140250
Zmdn002353	451.13	289.07	452.132	C21H24O11	[M-H]-	Epicatechin-6-C-β-D-glucopyranoside	Flavonoids	Flavanols	-	2	9	13059	9	9	9	16936	15448	13788	37889	9932.4	16349	19402	9	15978	11045	9	10587	14764	9	9	9	19511	20041	15103	9	9	9	9	9	9	9	9	9	9	20073	140250
MWSslk021	453.19	391.19	454.51	C26H30O7	[M-H]-	Obacunone	Terpenoids	Triterpene	751-03-1	2	1317900	14753000	5561400	42833	24131	9755.5	10070	9738.5	5579.6	25105	10465	7526.9	1516.7	2920.9	1418.9	1512.7	5947.4	9	13526	5046.4	7209.7	2085.6	3254.2	2556.7	15909	5540.4	4648.1	16294	3185.9	1912.9	2552.5	1022.6	630.77	893660	192780	685410
Lmmn009170	455.35	455.35	456.36	C30H48O3	[M-H]-	Mangiferolic acid*	Terpenoids	Triterpene	4184-34-3	2	38063	14725	66045	32117	40530	39060	50906	48608	45347	9	7732.7	27835	42501	98743	102700	9	50941	68879	9	9	9	9	9	9	9	9	9	9	9	9	7414.3	3221.7	9	3245.8	9	2747.1
Lmmn008971	455.35	455.35	456.36	C30H48O3	[M-H]-	Isomangiferolic acid*	Terpenoids	Triterpene	13878-92-7	2	44354	17386	69755	32667	40235	40060	53253	48668	50921	9	7007.5	30557	42979	99967	102040	40251	49370	62456	9	9	9	9	9	9	9	9	9	9	3871.9	2509.2	8086	9	9	9	9	9
mws4053	455.35	455.35	456.36	C30H48O3	[M-H]-	Ursolic acid	Terpenoids	Triterpene	77-52-1	2	29046	48885	68933	31686	39392	33840	29515	45597	28317	7115.8	8241.4	28328	41620	82192	104670	32908	46276	61885	9	9	9	9	9	9	3768.6	9	9	9	9	2023.4	7843.7	9	9	9	9	9
mad2085	457.08	295.04	458.085	C22H18O11	[M-H]-	Caffeoyl-p-coumaroyltartaric acid	Phenolic acids	Phenolic acids	-	3	17716	9557.3	52949	9	10133	30063	111450	9	19238	9	10514	9	33081	45729	39346	72664	71758	53550	37081	64784	87304	330640	9	411710	412150	326040	427610	206740	197320	256320	94053	114760	165040	9	19456	9
Lmjp003655	463.12	301.08	462.116	C22H22O11	[M+H]+	6-C-MethylKaempferol-3-glucoside	Flavonoids	Flavones	-	3	54802	69126	65662	5466200	11741000	4128500	9104200	14195000	11248000	8734500	9217800	22310000	37578000	23279000	38164000	48000000	39189000	29383000	21229000	9907100	33466000	423130	293170	198340	324510	333300	147570	615530	288010	305040	1561200	1283000	1158900	907190	911900	536560
HJAP011	463.11	343.08	462.116	C22H22O11	[M+H]+	Chrysoeriol-8-C-glucoside (scoparin)	Flavonoids	Flavonoid carbonoside	301-16-6	1	30802	29649	39626	1448400	2767700	741630	2365500	4596300	4102300	43128000	28827000	15380000	37589000	28809000	29626000	56083000	49270000	32183000	28130000	23236000	32032000	3213100	3598100	2424400	956000	564870	352810	2063500	1375100	1480600	426880	895690	734330	308450	422730	285300
Hmcp002539	463.12	317.06	462.116	C22H22O11	[M+H]+	Isorhamnetin-3-O-rhamnoside	Flavonoids	Flavonols	-	2	9	9	9	31342	11833	1787.8	36710	81633	134620	1219400	500660	171500	634190	329920	228760	482250	397160	238630	105960	117490	92071	163780	115300	146230	435670	400620	393720	207900	126810	198830	41985	56029	62612	19834	21060	7735.4
pmp000120	463.12	427.1	462.116	C22H22O11	[M+H]+	Diosmetin-6-C-glucoside	Flavonoids	Flavanones	-	1	30802	21043	20277	1061800	2526900	728160	2371600	3735800	3940700	39810000	26178000	14838000	33912000	27076000	24999000	49752000	41383000	24676000	22874000	24744000	26119000	2756300	3300500	2140900	949800	613740	281210	2382700	1101300	1439300	577430	835980	857190	370410	424600	328290
pmb3012	461.11	299.2	462.116	C22H22O11	[M-H]-	Chrysoeriol-7-O-glucoside	Flavonoids	Flavones	19993-32-9	2	16509	15837	22313	234860	916480	216500	455130	1286200	712030	392170	791640	1306800	1454700	1132800	1967100	1847100	1284900	1300000	311960	228880	637270	60049	55288	67571	22196	29085	21984	9	9	9	54456	40165	22313	7319.1	9	11800
Cmyp002064	463.12	301.08	462.116	C22H22O11	[M+H]+	Yuanhuanin	Flavonoids	Flavones	83133-14-6	2	9	9	9	5649500	10161000	3431900	7856000	14452000	10066000	9	8569500	20431000	34490000	23989000	37524000	46445000	35543000	29942000	18720000	7329200	30523000	337050	306020	197560	257840	274730	9	442530	211990	255290	1305400	1122600	800840	759010	780060	414160
Lmnp002845	463.13	343.09	462.116	C22H22O11	[M+H]+	Hispidulin-8-C-glucoside	Flavonoids	Flavonoid carbonoside	-	1	35888	34960	29080	1307800	2844100	772730	2568300	5126900	3695200	44806000	31097000	14898000	39642000	26785000	29297000	59427000	48109000	33523000	27449000	27240000	29858000	3158200	3176600	2344400	837910	579680	417630	2046900	1471400	1444500	571760	852770	666810	292510	371410	298520
Hmcn001884	463.09	301.03	464.095	C21H20O12	[M-H]-	6-HydroxyLuteolin 5-glucoside	Flavonoids	Flavones	-	2	36013	10490	20501	130400	128370	54420	76368	213660	63412	1864200	1527400	1007400	1767000	822810	2620900	5929500	3069300	2793600	2534500	592520	2630400	86359	143990	183320	204000	99970	120190	119470	109840	207100	111270	136940	162360	9	9	9
mws0091	463.09	300.03	464.095	C21H20O12	[M-H]-	Quercetin-3-O-glucoside (Isoquercitrin)*	Flavonoids	Flavonols	482-35-9	1	10827	13446	4024.9	24053	23159	15316	12083	85563	31700	2989100	1987100	1215700	2902700	1040300	3982300	8185700	4526800	4455700	3637100	784730	4297500	42149	19407	9645.8	28950	16403	7393.2	50775	39108	131770	39927	47594	63885	15572	11008	4635.8
mws1329	463.09	300.7	464.095	C21H20O12	[M-H]-	Quercetin-7-O-glucoside*	Flavonoids	Flavonols	491-50-9	1	9	9	9	9	9	9	9	9	9	9	90697	9	9	9	9	9	9	9	9	9	9	419760	405540	470760	187910	242440	626250	104330	94024	368530	50009	27842	44974	9	9	9
MWSHY0046	465.1	303.05	464.095	C21H20O12	[M+H]+	Isoquercitrin	Flavonoids	Flavonols	21637-25-2	2	61205	77741	84443	13440000	7353900	2888600	8601400	21838000	23685000	26379000	27279000	28599000	33245000	34384000	31431000	34886000	43202000	38980000	34850000	33691000	33276000	33992000	32358000	33896000	34368000	30467000	40650000	42537000	44963000	35420000	36234000	41969000	43666000	4479700	8834300	7921800
mws0061	463.09	300	464.095	C21H20O12	[M-H]-	Quercetin-3-O-galactoside (Hyperin)*	Flavonoids	Flavonols	482-36-0	1	33054	26512	10183	40768	40314	21281	35121	194270	52108	5547100	3597800	2343500	4984100	1765100	6880700	15227000	9363300	7362700	7179300	1461100	6587600	63273	27314	22963	84521	14488	29163	118710	68711	271660	65313	69800	137010	20680	17956	16184
pmp001309	465.1	303.1	464.095	C21H20O12	[M+H]+	6-Hydroxykaempferol-7-O-glucoside	Flavonoids	Flavonols	-	1	9	9	9	154230	202620	90705	258810	320990	297370	1391500	1151400	1229100	1227300	9	1505400	3730600	2147400	1877200	1804300	1180300	2969500	1241100	744410	1624400	949150	888330	1591100	912290	756290	1071200	492610	385190	1056400	379850	626650	249910
Lmzp002365	465.14	303.09	464.131	C22H24O11	[M+H]+	Hesperetin-7-O-glucoside*	Flavonoids	Flavanones	31712-49-9	1	4285.4	7366.1	9575	223140	193850	55155	409330	455970	718430	1073700	780210	1075400	1205700	706180	1404300	1136100	1627300	1116700	1309700	1145900	1457800	1559300	985110	1298400	1312500	1058900	1074800	1644500	1315200	1332800	1578900	1519900	1339200	129770	332330	217310
pme1598	463.12	301	464.132	C22H24O11	[M-H]-	Hesperetin-5-O-glucoside*	Flavonoids	Flavanones	69651-80-5	1	50941	58965	42140	94877	188100	67695	87916	356500	171910	2103300	1573800	1048100	2005300	791600	2867900	6236600	3138900	3029300	2518900	603640	3181200	9	9	9	9	9	9	9	9	9	9	9	9	12981	10486	14738
pme3544	471.2	425	470.194	C26H30O8	[M+H]+	Limonin	Terpenoids	Triterpene	1180-71-8	1	27777000	48480000	29039000	18226000	19621000	14678000	7675400	11433000	5863100	5327500	4142000	1621100	147950	42965	20072	115620	559860	17128	4838500	7529500	1225900	3856300	5391000	3636200	13811000	11179000	3934700	37583000	43657000	21499000	9265400	15585000	4557100	92956000	126730000	111230000
Lmzp003694	473.22	427.21	472.209	C26H32O8	[M+H]+	Obacunoic acid	Terpenoids	Triterpene	751-29-1	2	1694500	3832000	2144900	1027100	1077900	776350	379760	676110	340580	288160	252590	107890	8897.4	9	4236.1	7371.7	31461	9	307990	496690	67158	223370	335580	220680	849050	568130	214430	2546400	3030700	1333100	519240	839090	247260	6603400	7327500	6269000
Cmpp004617	473.22	427.21	472.21	C26H32O8	[M+H]+	Deacetylnomilin	Lignans and Coumarins	Coumarins	3264-90-2	3	1232000	578150	130870	1548900	804510	243930	650050	325390	49564	1242200	115420	51116	31969	9	9	46648	9	9	502070	151170	261590	441650	295660	472310	1061500	260840	282210	1992500	880740	1029100	1060000	846920	1006300	11869000	12781000	9984000
Cmpp004946	473.22	427.21	472.21	C26H32O8	[M+H]+	Isoobacunoic acid	Lignans and Coumarins	Coumarins	751-28-0	3	1226600	547220	134400	1565800	807290	264140	582420	313990	53857	1179300	113890	84757	45555	9815.4	10506	50027	24158	9	376410	239810	273170	432010	259740	423670	984410	99889	193610	1828500	871540	924080	999450	818870	1031100	12040000	11525000	8867100
pmb1912	474.17	327	473.166	C20H23N7O7	[M+H]+	10-Formyltetrahydrofuran	Alkaloids	Alkaloids	2800-34-2	1	858170	792720	2051900	967080	1914000	761770	1118500	2183800	1258600	8727900	5216500	4378900	11780000	5320500	7893300	14428000	10710000	4944600	6060800	5212800	6042500	999210	836510	626170	1375100	1114200	1120800	1058900	1089400	1416300	1596700	1818500	1811400	3103500	3501300	2685700
HJAP056	477.14	315.1	476.131	C23H24O11	[M+H]+	Dihydroxy-dimethoxyflavone-7-O-glucoside	Flavonoids	Flavones	-	2	106310	315510	137050	9	47472	204500	35407	41791	76497	37674	31500	64734	103890	94882	66017	215610	123580	67032	1338800	1317900	1421000	74805	69465	64572	29111	38985	20388	17229	13593	23164	9	9	9	5428.8	10304	11083
pmp000172	477.14	315.08	476.132	C23H24O11	[M+H]+	5,2'-Dihydroxy-7,8-dimethoxyflavone glycosides	Flavonoids	Flavones	-	2	81339	175710	147090	33656	32370	297050	9	9	9	15085	30187	58427	52709	48073	37810	108950	94002	26571	350380	340000	325120	35762	15769	27473	9	9	9	14222	7814.9	6873.3	9	9	9	9	9	9
Lmnp003184	477.14	357.09	476.132	C23H24O11	[M+H]+	Cirsimaritin-8-C-glucoside	Flavonoids	Flavonoid carbonoside	-	3	9	9	9	17185	27991	12294	75488	29681	22246	137700	109340	131990	234300	364700	296650	170660	337400	384880	265910	200860	209310	11536	9375.1	9	5295	8419.6	3994.3	6152.6	6115.1	3961	3682.5	2346.1	1566.7	9	4402.3	9
Hmgp001902	477.14	315.09	476.132	C23H24O11	[M+H]+	Pectolinarigenin-7-O-glucoside	Flavonoids	Flavones	-	3	36470	19496	61410	153570	149850	62047	237470	210240	351490	326810	544220	721650	457340	995990	687660	284450	794230	798800	6003500	5399100	7369600	704830	585970	487560	189890	185380	120420	83196	95049	131260	21927	24899	27975	22551	21624	19570
Lmcp003788	479.12	317.06	478.111	C22H22O12	[M+H]+	Isotamarixin*	Flavonoids	Flavonols	-	3	29252	15699	25496	194840	653200	219760	277320	691720	1052900	1376100	642690	831100	692140	528830	548500	1436900	1663000	601900	314530	193570	727070	47091	21803	37499	285680	249520	371220	207450	93045	73377	81099	264810	61951	1482900	1624400	994080
Hmzp003994	479.12	317.08	478.111	C22H22O12	[M+H]+	Pedaliin	Flavonoids	Flavones	22860-72-6	2	17379	31207	15952	237040	543750	196020	394890	634560	1023700	1151700	637040	687160	366920	275560	433260	1516100	977440	822900	335800	225170	600380	45347	27795	37216	210970	255650	425500	252280	127830	141270	82843	133420	64191	1492500	1267000	1069100
Lmjp003295	479.12	317.07	478.111	C22H22O12	[M+H]+	6-Methoxykaempferol-3-O-glucoside	Flavonoids	Flavonols	63422-27-5	2	23029	33595	33054	499400	947200	304960	480680	770990	619630	1140500	630070	679840	856900	1155200	810360	940150	1007600	892060	368000	331100	9	9	49771	34747	87331	102930	85144	643280	421200	335230	295630	298610	271380	1625700	1733400	1420100
Lmjp002906	479.12	317.07	478.111	C22H22O12	[M+H]+	Rhamnetin-3-O-Glucoside*	Flavonoids	Flavonols	27875-34-9	3	16613	34863	100790	269280	308950	99249	323530	521270	363010	4138900	2552000	839360	2623700	1333300	1950500	8579600	4782300	3344600	2448700	1357400	2552000	258280	190100	144950	122170	77853	39891	269330	266610	198740	289960	469980	379100	3161800	2212900	1886200
Hmcp002207	479.12	317.06	478.111	C22H22O12	[M+H]+	Isorhamnetin-7-O-glucoside (Brassicin)*	Flavonoids	Flavonols	6743-96-0	3	72430	74355	34286	258650	366900	156310	354700	616720	393340	5584400	3159700	982950	1935400	920170	1980900	8324800	4282300	3053400	2460800	1720800	2858900	252150	246160	146210	9	9	9	288140	225050	219750	321500	398200	363340	2882100	2445400	2324800
Lmjp003044	479.12	317.06	478.111	C22H22O12	[M+H]+	Isorhamnetin-3-O-Glucoside*	Flavonoids	Flavonols	5041-82-7	1	21738	78508	28875	307520	339600	112590	341220	534990	358920	4461800	3095900	973750	2022100	1497700	2518800	8234300	4861600	3285900	2645200	1580800	2680200	239020	209370	146210	9	9	9	300780	290320	242260	449220	478520	385220	3447800	2096400	1771600
pma6640	479.3	317.1	478.111	C22H22O12	[M+H]+	3'-O-Methyltricetin-7-O-glucoside	Flavonoids	Flavones	-	3	9	9	9	430860	1723900	470570	630990	553410	331100	832480	511760	529600	338000	1446900	1424000	669360	1550200	1051700	567600	808430	431230	47304	75172	82080	99945	133320	110770	441790	509370	232880	204600	290270	136160	1968700	1653600	1162000
Lmcp003402	479.12	317.06	478.111	C22H22O12	[M+H]+	Tamarixetin-3-O-glucoside (Tamarixin)*	Flavonoids	Flavonols	27542-39-8	3	23290	12451	9	94536	115370	73637	148990	141410	192860	9	128980	147420	159580	484610	448750	236760	343230	356610	827230	781520	851650	111170	80296	93545	31021	41864	30683	48513	50422	64473	60390	72166	35043	127810	9	9
Hmcp002298	479.12	347.07	478.111	C22H22O12	[M+H]+	Limocitrin-3-O-arabinoside	Flavonoids	Flavonols	-	3	9	9	9	9	9	9	5055	6307.3	4239.6	256810	145450	39360	204460	151320	156220	589100	309150	181960	362940	145950	416590	29490	17767	5766.9	21363	5821.8	9031.2	16570	15980	6307.3	7029.8	3605.4	715.01	11775	11412	12356
Hmgp002036	479.12	317.06	478.112	C22H22O12	[M+H]+	Nepetin-7-O-glucoside	Flavonoids	Flavones	569-90-4	2	20266	18434	21952	708180	765090	433000	736940	581530	752320	899650	1060100	822570	966560	912410	742750	971620	1312700	978440	632880	332050	601580	9	50710	9	94604	57184	101550	737790	423090	362460	130460	948970	137100	1385900	1713700	1292200
pmb2975	477.14	357.1	478.148	C23H26O11	[M-H]-	Hesperetin-3'-O-glucuronide	Flavonoids	Flavanones	1237479-05-8	3	2157.6	2086.8	6267.1	12963	24728	9772.9	28492	74172	39022	271330	388390	179220	770920	1201100	1100500	1276100	1108800	1758400	765210	741930	842840	72464	72400	64057	9	9	9	9	9	9	9	9	9	9	9	9
Smzp002615	481.09	153.01	480.09	C21H20O13	[M+H]+	11-O-Galloylbergenin	Lignans and Coumarins	Coumarins	-	2	9	7371.7	14621	9	9	9	9	9	9	30264	9	9	9	281060	319930	435750	511670	528790	145600	137230	103460	141610	100460	133550	67273	75117	99407	105980	46079	49373	30397	50818	25806	17177	24407	25016
Lmdp002969	481.1	319.06	480.09	C21H20O13	[M+H]+	Myricetin-3-O-galactoside	Flavonoids	Flavonols	15648-86-9	2	9	9	17462	27863	16022	9	32065	20216	30033	281400	263880	62688	193220	149120	244260	419440	440370	129000	222810	208520	183280	9	9	25773	53633	31587	9	482290	396980	379120	213290	376110	352390	183510	249410	98634
pmb3066	481.14	319.2	482.142	C22H26O12	[M-H]-	5-O-p-Coumaroylshikimic acid O-glucoside	Phenolic acids	Phenolic acids	-	2	175800	221390	180080	2731000	2131200	2809000	2323400	2422600	2788100	297130	752250	778850	116510	165070	117910	79689	118000	140070	21030	23089	24723	151190	149680	201690	345400	406130	456790	92803	74462	65727	9	9	9	125860	56373	66111
pmp001090	485.18	381.2	484.173	C26H28O9	[M+H]+	Evodol	Others	Others	22318-10-1	3	15146	31801	28259	15011	9269.1	6914.8	9253.4	7097.4	5604.4	7442	3683.3	2619.4	9	9	9	9	9	9	8946.5	13971	1581	9	9	9	5034.5	1573.9	527.98	35407	27727	7414.2	3968.6	5313.9	3420.5	110370	203480	105500
pmp001089	487.2	161.1	486.189	C26H30O9	[M+H]+	Rutaevin	Others	Others	33237-37-5	2	43190	178370	101880	82430	33831	58398	99252	56134	87938	25599	29317	13304	26868	25197	22785	16694	29616	15077	89216	143150	51714	16279	20291	10037	21268	20039	12473	22145	17871	11262	19729	23655	14365	121230	89656	106200
Lmmn003398	489.11	285.04	490.111	C23H22O12	[M-H]-	Kaempferol-3-O-(6''-acetyl)glucoside	Flavonoids	Flavonols	-	2	9	9	9	9	9	9	9	9	9	68851	57726	53513	126470	142880	302630	286190	217740	319530	80060	44159	169120	9	9	9	13109	13269	9	9	9	9	9	9	9	677970	146070	194040
pmn001712	549.22	489.2	490.177	C22H34O12	[M+CH3COOH-H]-	3-Hydroxy-4-isopropylbenzylalcohol-3-O-sophoroside	Phenolic acids	Phenolic acids	-	1	24981	10239	9770.9	438910	203420	196770	675360	456050	580130	296620	347880	546730	309270	619360	454350	327040	314730	604410	121100	132110	163990	234550	423360	265140	92742	133160	101430	34850	37800	36703	20961	25655	20199	9	8951.5	11877
Cmpp004143	491.23	369.2	490.22	C26H34O9	[M+H]+	Deacetylnomilinic acid	Terpenoids	Triterpene	-	3	136580	196360	153050	87894	151550	63334	134480	233420	130690	117410	199950	120890	52856	57711	83630	72019	64144	64236	63633	31262	59539	94938	43440	68119	233150	39791	115710	45647	41514	75893	65962	39411	67570	694900	776990	560840
Lmzn003560	489.22	471.2	490.221	C26H34O9	[M-H]-	Sudachinoid A	Terpenoids	Ditepenoids	-	2	1745000	3306900	3316200	1230500	611050	583730	485890	364810	190500	191350	48882	49344	29497	9592	6248.9	25021	14572	6018.6	38494	118150	9911.6	27808	46109	21598	460710	203660	60223	478570	362490	64843	31973	75975	13174	1192300	2092700	852000
pmb2984	491.1	287.1	492.127	C23H24O12	[M-H]-	Eriodictyol-7-O-(6''-acetyl)glucoside	Flavonoids	Flavanones	-	3	9	9	9	9	9	9	9	9	9	41493	26070	44770	785260	800690	1039500	800260	880200	1004200	32830	20843	20268	9	9	9	9	9	9	9	9	9	1646.5	9	980.5	9	9	9
pmb0736	493.13	331.08	492.127	C23H24O12	[M+H]+	tricin-7-O-Glucoside	Flavonoids	Flavones	32769-01-0	1	31353	22901	24502	493720	560840	226890	595890	963890	817040	7405300	3735200	2349800	3649200	3113300	2660100	11555000	5275300	3665500	14266000	11882000	15242000	2508700	2113700	1689300	820400	1104700	354570	403150	409080	352590	123680	148980	99778	32029	66390	47664
Lmnp002961	493.14	373.1	492.127	C23H24O12	[M+H]+	Cirsiliol-8-C-glucoside	Flavonoids	Flavonoid carbonoside	-	2	14844	9318.7	7417.6	500220	369350	127660	628430	1619400	2100800	24107000	14093000	6493800	18052000	14204000	16144000	27839000	24470000	20715000	21281000	18885000	18957000	1647900	1353000	949410	499270	685770	180460	266410	321830	275480	39838	99674	40949	22278	17609	11109
Lmgp003989	499.13	163.04	498.116	C25H22O11	[M+H]+	Dicaffeoylshikimic acid	Phenolic acids	Phenolic acids	-	2	9	9	9	9	9	9	13069	9	47000	4922900	2598600	248290	258620	282980	181700	320710	703880	359920	213760	154090	121290	2433600	6762700	3793300	939020	1184800	860360	124880	532670	439360	98222	124870	92848	10241	13970	9
pmb3061	499.15	163.1	500.153	C22H28O13	[M-H]-	5-O-p-Coumaroylquinic acid O-glucoside	Phenolic acids	Phenolic acids	-	3	520860	4560300	1830000	12558	6932.5	1060.4	5035.1	23760	24177	302750	74809	32183	70636	52167	37225	26223	27556	19501	59308	40552	56106	86469	108560	105400	64262	72924	71569	17867	17025	23186	4500.1	6051.8	4815	9	9	9
pmn001642	503.08	459.1	504.09	C23H20O13	[M-H]-	Kaempferol-3-O-(2''-O-acetyl)glucuronide	Flavonoids	Flavonols	-	3	281360	260470	206590	551610	462640	285210	800710	766710	619740	468940	448870	765790	1158100	518110	374110	872050	495120	562830	173760	9	9	114310	112000	83517	130400	151000	218000	101260	124830	250470	9	9	9	9	551010	101070
pmb3000	503.12	341.1	504.127	C24H24O12	[M-H]-	Chrysoeriol-7-O-(6''-acetyl)glucoside	Flavonoids	Flavones	-	2	9	9	9	473690	612360	231080	708410	898800	735190	9350600	7428000	2385000	9762300	6745600	6868600	14349000	10135000	8150200	7282100	7964200	6545600	196740	273540	128780	62781	74543	30731	222100	161280	158270	122150	195570	144200	15744	12835	42855
Lmsn002288	503.14	341.09	504.148	C21H28O14	[M-H]-	1-O-Caffeoyl-(6-O-glucosyl)-β-D-glucose	Phenolic acids	Phenolic acids	-	1	19206	19032	29944	74580	20453	43217	130790	35704	55530	93095	97803	82856	105200	23442	17899	113800	29455	122240	382900	373810	355290	2738300	1948200	3879900	886670	752550	1370700	2672300	2037200	1964600	1388900	1461800	1339800	215800	318940	327610
Hmhn007023	503.34	485.33	504.345	C30H48O6	[M-H]-	2α,3α,19α-Trihydroxyursolic acid	Terpenoids	Triterpene	-	2	101830	122840	615820	9603	9	2996.5	4606.8	1573.5	9	9	9	9	3324.3	2900.8	9	9	9	9	9	9	9	9	9	9	9	9	9	9	9	9	9	9	9	9	9	9
Hmln002199	505.1	300.03	506.107	C23H22O13	[M-H]-	Quercetin-3-O-(6''-acetyl)galactoside	Flavonoids	Flavonols	-	2	4760.7	2308.3	2353.5	9	9	9	9	9	9	51704	38788	16719	118600	53106	128010	295660	204740	147420	56118	14051	101240	9	9	9	9	9	9	1785.8	1178.5	597.88	9	9	9	78106	47967	47106
pmp000013	507.15	345.09	506.142	C24H26O12	[M+H]+	Eupatilin-7-O-glucoside	Flavonoids	Flavones	-	1	9	9	9	89062	87097	55304	128620	245310	216970	1958100	1067600	762120	1307800	989770	861530	4289000	2194200	1386500	13909000	12670000	16500000	1079300	636500	510570	469840	522500	227840	295670	310450	251130	64561	100520	56925	26931	20945	18360
Xmbn007315	505.3	343.16	506.215	C26H34O10	[M-H]-	Chestnutlignansoide	Lignans and Coumarins	Lignans	-	2	44472	30926	9	45212	13740	19713	15880	8570.1	4815.4	16105	9	4707.9	9	9	9	9	9	9	9	9	9	9	9	9	9	9	9	15972	6153.1	1332	9	9	9	226800	450290	192190
Hmcp002399	509.13	347.07	508.121	C23H24O13	[M+H]+	Limocitrin-3-O-glucoside	Flavonoids	Flavonols	-	1	17418	9	16223	9	9	9	24154	43566	78939	131560	59978	73485	173330	168310	152090	274490	241880	215880	267880	209640	309070	9	9	9	9	9	9	46548	38423	5150.6	22694	28037	5844.9	9	9	9
HJAP006	509.13	347.08	508.122	C23H24O13	[M+H]+	Syringetin-7-O-glucoside	Flavonoids	Flavonols	-	2	116810	113070	59737	9	9	9	9	9	9	1811700	952730	182540	822290	601620	544330	3314100	1762000	749840	814030	604320	1371300	146720	112230	67993	65512	71226	32993	97371	60750	44129	23104	16665	8980.9	648540	521340	627130
Zmjp004852	509.13	347.08	508.122	C23H24O13	[M+H]+	5,6,3′,4′-Tetrahydroxy-3,7-dimethoxyflavone-6-O-glucoside	Flavonoids	Flavones	-	2	9	9	9	9	37822	9	9	9	9	2831500	1203500	9	703010	491070	9	3660900	2059700	912420	1241900	518820	1598800	150620	143700	70584	9	77719	31098	118050	45376	63520	9	9	9	1140900	1059000	890020
Hmcn000773	507.17	179.05	508.179	C21H32O14	[M-H]-	6'-O-Glucosylaucubin	Others	Others	-	2	16740	20892	24804	9	9	9	22567	10226	18016	6725.9	21063	9	14161	30895	16214	17365	15252	25476	30427	28676	22094	21402	25600	20500	45177	42022	28981	53840	61114	57817	89713	95894	97105	11761	10336	9208.3
pme2181	513.21	453	514.22	C28H34O9	[M-H]-	Nomilin	Terpenoids	Triterpene	1063-77-0	2	25103000	14988000	4488700	2039000	859100	216400	358030	849320	261440	1196500	598290	124410	50720	16881	9716.1	17180	246720	15581	4188800	1452500	1818300	2511100	1457100	2978600	19819000	5791300	6892800	39405000	11169000	4450200	4590300	2632300	1228200	89967000	57668000	89352000
pmn001382	515.12	353.09	516.127	C25H24O12	[M-H]-	Isochlorogenic acid A*	Phenolic acids	Phenolic acids	2450-53-5	1	70267	19167	9489.9	9	9	9	76389	422580	593210	49850000	30561000	5049800	5208900	5734700	3799200	9518300	16549000	8298500	2464400	1536800	2110200	27801000	40165000	35773000	8028900	12856000	9170800	4268300	4323900	6949400	1084800	671350	957160	18450	51888	54641
Li512115	515.12	353.09	516.127	C25H24O12	[M-H]-	Isochlorogenic acid B*	Phenolic acids	Phenolic acids	14534-61-3	1	67760	24672	13415	80262	108680	144240	87315	574360	647970	48218000	40408000	5435100	9	7231300	6224200	8280300	17886000	10745000	2881800	2308300	2701800	28117000	50446000	36268000	9285100	15702000	13647000	3951200	4344900	5943700	1168700	1222100	684090	9	9	9
MWSmce346	517.13	163.04	516.45	C25H24O12	[M+H]+	1,3-Dicaffeoylquinic acid	Phenolic acids	Phenolic acids	19870-46-3	2	9	15028	23337	74868	9	15780	34197	117490	90391	15085000	6589300	698300	786870	654830	461580	1256700	2456100	973030	406120	434310	419950	10438000	14535000	12015000	3133500	3537300	3647400	1156000	1877600	1841400	397750	338900	320920	38456	68901	9
MWSmce328	517.13	163.04	516.45	C25H24O12	[M+H]+	4,5-Dicaffeoylquinic acid*	Phenolic acids	Phenolic acids	57378-72-0	1	36192	51995	32575	9	9	9	19429	144810	125640	21266000	8275500	720700	729560	632070	603030	1291900	2568200	881580	619320	479840	393130	8386300	15753000	10392000	3054700	3565900	3783000	1391500	1430400	2101100	496400	450660	387320	58293	77823	98215
Hmbn002692	517.16	175.04	518.164	C22H30O14	[M-H]-	6'-O-Feruloyl-D-sucrose	Phenolic acids	Phenolic acids	118230-77-6	2	156910	117620	70946	102430	77982	224990	103950	103680	187040	177200	211690	135410	176460	114320	115550	86915	48729	78232	9	9	9	9	24265	9	40760	9	9	9	18113	9	9	9	9	9	9	9
pma0791	521	273	520.122	C24H24O13	[M+H]+	Naringenin-7-O-(6''-malonyl)glucoside	Flavonoids	Flavanones	-	3	9	9	9	9	9	9	15699	47393	40756	160070	155810	9	321070	193630	257600	380090	289570	291310	114180	21736	108150	235770	119030	213090	234790	126440	241200	167680	103320	145590	78595	60274	77614	735040	104040	150270
pmn001378	519.19	357.14	520.194	C26H32O11	[M-H]-	Pinoresinol-4-O-glucoside	Lignans and Coumarins	Lignans	41607-20-9	3	14066	59028	38481	43243	33817	61218	26396	31617	14066	48413	47242	9	35162	18754	18168	56724	17152	27304	125870	75326	132430	716990	675520	578240	1209500	1649300	1393000	537280	416150	221550	40110	251000	62197	93003	149280	94127
pmn001710	521.13	359.08	522.137	C24H26O13	[M-H]-	Rosmarinic acid-3'-O-glucoside	Phenolic acids	Phenolic acids	910028-78-3	2	170620	192330	19268	664560	453100	750320	471740	554100	754580	139380	277710	585430	154200	141960	148730	25923	38192	179660	9	11814	16276	39029	25816	40076	113670	77829	46241	21570	19344	19333	26729	9	9	57181	57484	53859
HJN083	521.2	359.15	522.211	C26H34O11	[M-H]-	lariciresinol-4'-O-glucoside	Lignans and Coumarins	Lignans	143663-00-7	2	279030	141400	133190	640530	482680	707480	551780	785580	706270	204460	274580	585270	173050	162630	50939	48898	38055	159360	14430	9692	22597	55431	34592	28478	89058	61085	63630	16274	22168	20360	9	9	9	69162	20793	64215
Lmtn003096	523.21	361.14	524.226	C26H36O11	[M-H]-	Secoisolariciresinol 4-O-glucoside	Lignans and Coumarins	Lignans	-	2	311120	613180	352140	1119700	1349400	1646400	1220900	1479400	1302500	339200	340740	456720	71757	83449	69176	80113	60351	124280	199480	108830	165980	1127200	817300	922740	2787300	2042600	2243600	1248300	756680	880390	49367	64115	59536	3325000	4114000	2141400
Zmcn005156	529.13	353.08	530.142	C26H26O12	[M-H]-	4,5-O-Dicaffeoylquinic acid Methyl Ester*	Phenolic acids	Phenolic acids	-	2	9	9	9	8482.1	5685.9	9312.7	7713.7	80118	39106	8634500	3238100	498580	814250	584540	626690	1451100	1730300	927200	1035900	857780	954180	6242500	13005000	8304200	2916700	4408000	3019200	928520	1001700	1268600	149530	212630	155200	9	9	9
pmb2833	529.16	193.1	530.164	C23H30O14	[M-H]-	3-O-Feruloylquinic acid-O-glucoside*	Phenolic acids	Phenolic acids	-	1	79681	178360	102320	17747	12485	10210	29855	29361	45035	63629	123450	44321	93261	59026	74390	91423	42032	35374	20396	14418	15118	55896	66586	84852	51846	56385	56507	23140	22092	26368	8867.7	10377	10118	9	9	9
pmb2554	529.16	193.1	530.164	C23H30O14	[M-H]-	5-O-Feruloyl quinic acid glucoside*	Phenolic acids	Phenolic acids	-	1	79681	178360	102320	17747	12485	10210	29855	29361	45035	63629	123450	44321	93261	59026	74390	91423	42032	35374	20396	14418	15118	55896	66586	84852	51846	56385	56507	23140	22092	26368	8867.7	10377	10118	9	9	9
MWStz043	531.15	163.04	530.5	C26H26O12	[M+H]+	3,4-Di-O-caffeoylquinic acid methyl ester*	Phenolic acids	Phenolic acids	114637-83-1	2	107200	115660	108410	137320	99805	184020	131770	171350	183990	13726000	3851000	415620	740000	432750	548240	1652700	1922100	781470	1102900	1289000	1176900	16666000	22708000	19834000	5378900	7249100	5913800	2024600	2009500	2888100	556490	915980	422970	65257	54729	41239
Lmhn003801	531.12	337.06	532.122	C25H24O13	[M-H]-	Feruloylsinapoyltartaric acid	Phenolic acids	Phenolic acids	-	2	9	9	9	9	9	9	9	9	9	375220	113020	27804	121440	45812	46511	197060	96910	35422	654700	581110	570690	1123500	1476400	1236100	882190	991060	985130	463540	450600	422850	126690	152050	187500	9	9	9
Lmzn003953	531.23	489.21	532.231	C28H36O10	[M-H]-	Nomilinic acid	Terpenoids	Triterpene	35930-20-2	3	995420	955710	527940	26270	24049	7771.3	14631	29178	9455.8	23097	15930	5181.2	9	9	9	1938.3	11926	2974.8	66811	20890	28666	33367	19985	36157	249480	75287	61621	695090	323210	154240	64389	52060	23924	2682100	738390	2486800
Lmmp003817	535.11	287.05	534.101	C24H22O14	[M+H]+	Kaempferol-3-O-(6''-malonyl)glucoside	Flavonoids	Flavonols	-	2	100490	30029	34537	9	9	9	9	9	9	36725	34135	43508	381930	122160	139260	491610	219550	119780	410930	209990	264760	409750	508790	431680	341720	450940	412960	1282600	1291400	1657900	1777300	1980200	1930800	39391000	9036300	7695900
HJN084	535.11	331.05	536.116	C24H24O14	[M-H]-	Laricitrin-3-O-(6''-acetyl)glucoside	Flavonoids	Flavonols	-	2	9	9	9	250610	259460	99199	156040	226180	122770	940770	1251200	536420	1386500	814330	1142900	3459200	1854400	1281800	415140	403250	361950	58130	50831	42121	27046	30803	41586	8978.6	24609	24120	9	9	9	9	9	9
Zmjp004610	537.16	375.11	536.153	C25H28O13	[M+H]+	5,4'-Dihydroxy-3,6,7,3'-tetramethoxyflavone-4'-O-glucoside	Flavonoids	Flavones	23279-19-8	2	17845	29872	27974	41059	59433	77791	101190	94357	106870	396260	238610	263820	187060	215450	154450	533380	306180	301390	1972900	2356700	2318600	346820	193330	221920	112580	168670	53045	44399	40751	18434	4576.2	12807	7417.6	9148.7	19284	21532
pmb0608	549.12	301.4	548.117	C25H24O14	[M+H]+	Chrysoeriol-7-O-(6''-malonyl)glucoside	Flavonoids	Flavones	-	1	9	9	9	574410	1315100	300560	788110	1816300	888210	2403400	2059700	3102600	8167000	5356300	11390000	16222000	10623000	8035800	2806900	1723600	4459700	72992	95327	76086	51746	78171	32217	87957	43696	62782	290390	245530	253900	299630	242510	138120
pmp000588	549.12	463.12	548.117	C25H24O14	[M+H]+	Diosmetin-7-O-(6''-malonyl)glucoside	Flavonoids	Flavanones	-	1	9	9	9	16127	23314	3495.5	17792	17199	8130.5	54735	49287	48110	235360	128660	260280	453380	286250	159930	81829	55627	123270	9	9	9	9	9	9	9	9	9	8302.1	10637	4152.8	11189	14224	1750.2
Lmsn003628	547.17	223.06	548.174	C23H32O15	[M-H]-	6'-O-Sinapoylsucrose	Phenolic acids	Phenolic acids	-	3	1236800	253200	348880	7892700	3069400	6504800	7033500	1641200	3031700	302340	322550	306350	44506	39080	50663	75932	35720	9	345960	415730	344680	940700	1198900	2087700	435410	445510	444450	487240	301970	573120	539450	259840	303140	244940	229170	247960
pmn001671	547.17	223.1	548.174	C23H32O15	[M-H]-	Furanofructosyl-α-D-(6-mustard acyl)glucoside*	Phenolic acids	Phenolic acids	-	1	941160	250200	319650	7657600	2495400	5967500	6823900	1260800	3101500	251470	307010	316980	76891	51183	56552	61686	31398	49439	203690	318860	293750	1321200	1614100	1785700	340380	307050	301390	314410	215840	290650	273760	158850	218350	236210	231130	214650
pmn001672	547.17	223.1	548.174	C23H32O15	[M-H]-	Furanofructosyl-α-D-(3-mustard acyl)glucoside*	Phenolic acids	Phenolic acids	-	1	1393600	250500	419870	9311200	3250700	7232700	8806000	1755500	3602600	186580	353710	525990	52874	37113	9	34986	28638	38681	283860	314560	288650	811020	1132400	1058000	395250	503820	499450	361930	370630	464140	9	9	9	287580	257910	299270
pma0795	551	303.1	550.096	C24H22O15	[M+H]+	Tricetin-5-O-(6''-malonyl)glucoside	Flavonoids	Flavones	-	3	22848	9	25578	1047700	1205600	197460	772310	1698400	211930	835340	609280	1097800	1544700	1014000	1088600	2633300	1695300	883360	278320	178680	394240	262880	172710	171360	1150800	1525700	843060	136800	58402	40882	83010	47604	29786	149350	96948	75204
pmb2979	549.12	387.1	550.132	C25H26O14	[M-H]-	Hesperetin-7-O-(6''-malonyl)glucoside	Flavonoids	Flavanones	-	3	9	39257	59512	101340	104290	73195	78655	66180	80525	51651	33717	29950	41106	76315	135980	198880	177700	9	66323	107790	90706	424410	466550	419620	468360	634500	575020	310510	153470	215020	33025	69527	39236	9	66582	33205
Hmmn003659	549.12	345.06	550.132	C25H26O14	[M-H]-	Limocitrin-7-O-(6''-Acetyl)glucoside	Flavonoids	Flavonols	-	2	9	9	9	87281	153320	92277	108590	320030	84149	1069900	1020100	358310	873450	798370	564810	1076300	955480	655960	107850	126510	131210	17086	20609	9	20190	31290	21288	9	5011.5	9	9	9	9	9	9	9
Lmmn002260	551.21	389.17	552.221	C27H36O12	[M-H]-	5'-Methoxyisolariciresinol-9'-O-glucoside	Lignans and Coumarins	Lignans	-	2	240280	122190	139360	1257800	860930	1323100	969860	655480	618880	171490	220420	266620	9	26733	45806	9	9	23515	10879	9	14216	74258	9	9	9	150850	236190	72189	52801	37352	43230	84229	11298	132760	98807	128290
HJAP064	565.12	317.08	564.088	C25H24O15	[M+H]+	Isorhamnetin-3-O-(6''-malonylglucoside)	Flavonoids	Flavonols	-	3	60018	242250	131500	93758	144820	54841	130370	153820	98615	882180	363820	175370	911960	637060	997030	2567100	1679100	992940	233980	80897	264140	9	9	9	61539	27230	34953	121550	26026	48849	12855	17934	24092	7804900	4799900	4550500
pma0760	565	317	564.112	C25H24O15	[M+H]+	3'-O-Methyltricetin-7-O-(6''-malonyl)glucoside	Flavonoids	Flavones	-	3	64355	173440	37680	101340	161980	42484	139800	165650	66738	865900	294620	162010	754230	581610	772810	2044900	1438200	927770	209760	86797	254420	9	9	9	39751	28484	24713	93629	27995	43843	8458.1	11256	28213	6442500	3957100	3701100
Zmhp005139	565.12	317.07	564.112	C25H24O15	[M+H]+	Tamarixetin-3-O-(6''-malonyl)glucoside	Flavonoids	Flavonols	-	3	100590	260370	147530	130190	163300	65358	142360	182760	104420	953960	383850	159250	995380	654170	819620	2615200	1580300	1021400	297670	110580	271440	9	9	9	43809	31370	33073	127630	32213	48086	20430	22683	21927	7662700	4927100	4584900
Zmjp003463	565.16	433.11	564.147	C26H28O14	[M+H]+	"vitexin-2""-O-xyloside*"	Flavonoids	Flavonoid carbonoside	-	2	57948	14373	22155	1692200	2490500	726020	4448800	11385000	7980400	30885000	43938000	44886000	66627000	66459000	65646000	67923000	64606000	61664000	32804000	36599000	24612000	616640	583320	550280	2972200	3316400	1813800	7409300	4973600	4737000	905620	1589300	993140	84404	214590	91108
Lmnp003080	565.16	433.11	564.148	C26H28O14	[M+H]+	Hispidulin-8-C-(2''-O-xylosyl)xyloside	Flavonoids	Flavonoid carbonoside	-	2	9	9	9	37541	29381	13347	59695	70975	61715	71149	199110	195780	865380	546560	583270	498740	384570	273090	66081	86565	54816	9	9	9	9	9	9	21214	13816	11429	9053	2531.8	9	9	9	9
Lmnp202580	565.16	433.11	564.148	C26H28O14	[M+H]+	Apigenin-8-C-(2''-xylosyl)glucoside*	Flavonoids	Flavonoid carbonoside	-	1	50253	12413	22453	1963600	2611600	804750	5840200	11293000	7285800	31350000	42796000	46932000	70876000	64474000	65826000	64302000	64093000	62800000	33035000	37163000	25961000	675280	557200	546690	2967200	3162900	1846500	7770800	4904000	4927700	990320	1479600	1213900	123910	237040	82178
Smhp004476	565.15	433.11	564.148	C26H28O14	[M+H]+	Isovitexin-2''xyloside*	Flavonoids	Flavonoid carbonoside	-	2	49436	14180	21555	1933000	2590500	749370	6153600	11407000	7889100	33512000	39960000	46025000	65440000	66135000	69883000	66910000	65376000	60178000	29880000	34183000	28484000	642010	625950	468570	3349500	3471800	1873600	7977200	5256900	4947500	975050	1542900	1115700	124810	202020	92238
pmp000236	565.16	367.1	564.148	C26H28O14	[M+H]+	Isovitexin-8-O-xylcoside*	Flavonoids	Flavonoid carbonoside	-	2	22916	31730	15697	225930	365140	79905	655650	1567000	1076300	4745400	7586400	8568300	28677000	19575000	21885000	25006000	21632000	13491000	5173200	5765000	4354100	100120	96638	81517	437810	436110	225680	996760	759940	696120	105470	169230	122270	17964	32786	28952
Lmnp102580	565.16	433.11	564.148	C26H28O14	[M+H]+	Apigenin-6-C-(2''-xylosyl)glucoside*	Flavonoids	Flavonoid carbonoside	-	1	50253	12413	22453	1963600	2611600	804750	5840200	11293000	7285800	31350000	42796000	46932000	70876000	64474000	65826000	64302000	64093000	62800000	33035000	37163000	25961000	675280	557200	546690	2967200	3162900	1846500	7770800	4904000	4927700	990320	1479600	1213900	123910	237040	82178
HJN076	563.18	255.07	564.184	C27H32O13	[M-H]-	Pinocembrin-7-O-neohesperidoside*	Flavonoids	Flavanones	13241-31-1	3	9	9	9	1224500	957930	224940	1543800	1987000	1096500	2082900	2166700	4185500	593940	682670	977960	587260	798450	703220	1104100	1291300	1366200	1620600	1888200	1727300	1385500	2523600	3806300	1524200	2418000	3501100	2400000	2945600	3162100	145840	149390	163480
HJN079	563.18	255.07	564.184	C27H32O13	[M-H]-	Pinocembrin-7-O-rutinoside*	Flavonoids	Flavanones	118985-31-2	3	9	9	9	1224500	957930	224940	1543800	1987000	1096500	2082900	2166700	4185500	593940	682670	977960	587260	798450	703220	1104100	1291300	1366200	1620600	1888200	1727300	1385500	2523600	3806300	1524200	2418000	3501100	2400000	2945600	3162100	145840	149390	163480
Zmxp005470	579.13	331.08	578.127	C26H26O15	[M+H]+	Tricin-7-O-(6''-O-malonyl)glucoside	Flavonoids	Flavones	-	2	14309	40372	11212	229290	322320	107630	357140	408350	238020	5113400	1969800	1063300	2697300	1743700	1729100	8981300	3841200	2132300	4557300	4037900	4403100	817890	604990	338240	185420	245750	68258	76814	61334	54730	45476	44499	39796	11678	11832	13515
pmp000237	579.13	283.06	578.127	C26H26O15	[M+H]+	Apigenin-6-C-(2''-glucuronyl)xyloside	Flavonoids	Flavonoid carbonoside	-	3	9	12386	10291	21141	30291	8036.1	51400	144090	86625	534910	699330	826710	4358800	2460400	3155100	4641800	2478700	1463900	564580	583130	466640	17491	12918	24126	66136	65078	49747	141750	92621	81794	32715	40421	32440	9	15760	9
Lmpp003930	579.15	271.06	578.142	C30H26O12	[M+H]+	Apigenin-7-O-(6''-p-Coumaryl)glucoside	Flavonoids	Flavones	-	2	9	9	9	98548	93524	19933	125820	239370	235930	1176800	1532800	1716300	11991000	8129100	10137000	13769000	10922000	7846900	2524000	1380400	1759100	55818	114940	45076	38790	117890	9	67170	90913	110050	264750	311640	250680	5565100	5386500	3358300
Lmgp004474	579.17	271.06	578.164	C27H30O14	[M+H]+	Genistein-7-O-galactoside-rhamnose	Flavonoids	Isoflavones	-	2	9	9	9	890430	504430	293530	1347800	1961900	2295400	11346000	10656000	15314000	43281000	40140000	44987000	43664000	44300000	44533000	19342000	10979000	12628000	352130	161430	237570	671780	71498	151360	929970	283010	531780	1811900	2299600	1932000	34294000	31027000	24175000
pme0368	579.17	271.01	578.164	C27H30O14	[M+H]+	Apigenin-7-O-rutinoside (Isorhoifolin)*	Flavonoids	Flavones	552-57-8	1	53514	8454.8	26061	766760	779170	326200	1584700	2004100	2266000	11846000	11357000	14985000	44001000	45135000	47254000	49144000	45790000	42556000	18712000	10289000	14053000	414350	231000	267620	696640	91492	131500	920010	318970	617730	1860700	2186700	1948700	38635000	36145000	24011000
MWSmce498	579.17	271.07	578.164	C27H30O14	[M+H]+	Apigenin-7-O-neohesperidoside (Rhoifolin)*	Flavonoids	Flavones	17306-46-6	3	11123	9344.3	5605.1	91979	98200	44703	199940	236550	306050	1412700	1296600	1815500	13201000	8045600	10375000	15180000	11675000	8248900	2791300	1212000	1898400	38790	105290	37564	9	9	9	234220	33131	52588	288150	292160	248810	5853700	5610600	3636800
Lmyp004081	579.17	313.07	578.164	C27H30O14	[M+H]+	Isovitexin-2''-O-rhamnoside*	Flavonoids	Flavonoid carbonoside	-	3	11126	9	9	37345	34480	17145	76824	134270	95683	517830	613390	662270	3298700	1991300	2431000	3752000	2467000	1518000	500380	626130	451090	30607	25105	39498	82667	72747	48826	118480	103670	99343	38580	39502	36146	9	9	11098
pme3227	579.17	433	578.164	C27H30O14	[M+H]+	vitexin-2''-O-rhamnoside*	Flavonoids	Flavonoid carbonoside	64820-99-1	1	7095.3	4496.3	10291	106650	115650	44755	334390	618900	450670	2635700	2278200	3055400	14701000	9428500	9181500	16883000	9641700	6286400	2369800	2613300	1590900	80376	69270	59200	182610	224440	142120	611550	347900	353400	91259	152170	133390	9	9	9
Zmjp003179	581.15	449.11	580.142	C26H28O15	[M+H]+	orientin-2''-O-xyloside*	Flavonoids	Flavonoid carbonoside	-	3	9	9	9	69629	98175	42155	177610	637540	422010	2960500	3365000	2410100	2737400	5379300	3831400	5204400	4368800	3281400	6093100	4329300	6060100	37602	11806	11962	17410	20727	32454	41763	44903	22923	9219.5	9	7960	9	9	9
pmp000238	581.15	383.07	580.143	C26H28O15	[M+H]+	Luteolin-6-C-arabinoside-7-O-glucoside	Flavonoids	Flavonoid carbonoside	-	3	11835	19499	39131	28559	31446	15591	62187	165590	116910	826820	739190	675960	756150	808270	1035900	1403100	1095700	747430	1600400	979010	1471100	9	9	9	9	9	9	9	9	9	9	9	9	9	9	9
pmb0636	581.15	431.3	580.143	C26H28O15	[M+H]+	orientin-7-O-arabinoside*	Flavonoids	Flavonoid carbonoside	-	3	9	9	9	11835	18107	9	32740	119710	69253	439290	634290	504090	415350	623840	643340	980530	841040	555570	1076400	751970	1275100	17410	15351	9	9	9	9	11139	9	9	9	4874.8	9	9	9	9
mws0046	579.17	271.06	580.179	C27H32O14	[M-H]-	Naringenin-7-O-Neohesperidoside(Naringin)*	Flavonoids	Flavanones	10236-47-2	1	3669.7	2413.6	7692.6	115680	130750	39769	126580	244270	259910	931250	854950	684730	735950	629880	610730	1120400	959460	772050	5464900	2009700	4402300	32810000	19694000	35594000	37009000	29256000	43251000	35300000	33439000	40243000	32661000	30690000	31639000	2925500	1721000	2036000
mws1066	579.17	271	580.179	C27H32O14	[M-H]-	Naringenin-7-O-Rutinoside(Narirutin)*	Flavonoids	Flavanones	14259-46-2	1	2413	1201.1	9	84956	98211	31334	100060	169910	180830	669290	592730	550010	521720	509580	562880	762280	716610	750990	5051100	1602700	3565600	26246000	14042000	28434000	31799000	26920000	43635000	30016000	23532000	37903000	20173000	20178000	25885000	2154500	1269100	1215900
Lmqn001932	579.21	417.16	580.216	C28H36O13	[M-H]-	syringaresinol-4'-O-glucoside	Lignans and Coumarins	Lignans	7374-79-0	2	998790	1204400	1421000	657190	372930	902520	428420	185670	495990	16245	26302	121210	26348	25815	28057	16254	17223	23737	75773	71786	60580	79336	99069	69938	167540	226670	244600	1860500	2103200	1757300	73242	217220	116670	57004	110320	86203
pmp001288	593.19	285.1	592.179	C28H32O14	[M+H]+	Acacetin-7-O-rutinoside (Linarin)	Flavonoids	Flavones	480-36-4	2	9	9	9	179540	149680	54407	380760	461900	385580	232590	442630	1322400	4840400	2647600	3429200	5387700	5008400	2271400	5847700	4996400	4493400	49972	18407	48952	89264	42110	69652	236120	138280	88519	467920	497110	487310	138630	129910	82476
Zmjp005293	593.19	285.08	592.179	C28H32O14	[M+H]+	Robinson-7-O-Neohesperidin	Flavonoids	Flavonols	-	2	9	11101	30137	65698	84171	18781	189180	216800	184830	111790	197190	675250	2450400	1544800	1768600	2799900	2534300	1180800	2743200	2316700	2281000	24047	19335	26001	34339	27958	32263	120440	73851	54211	258430	234830	321240	70303	60306	40519
mws1290	593.13	285	594.137	C30H26O13	[M-H]-	Kaempferol-3-O-(6''-p-Coumaroyl)glucoside (Tiliroside)*	Flavonoids	Flavonols	20316-62-5	2	9	9	9	178820	139100	36582	297640	473840	416190	1296100	2122300	1194400	1866200	1045000	1326300	3260000	3052500	1410100	8930300	6390900	7378500	18676000	11254000	17123000	29130000	27344000	34166000	39568000	34722000	37615000	23132000	25339000	24196000	1618400	1487100	2005600
Hmjn004446	593.13	285.04	594.137	C30H26O13	[M-H]-	Luteolin-7-O-(6''-caffeoyl)rhamnoside	Flavonoids	Flavones	-	2	5355.9	5031.5	1720.4	404050	260050	94883	813530	1066300	965450	3560900	5317400	3517000	4245300	2483300	3136600	7455400	7722400	4111700	21372000	15828000	19282000	40569000	25462000	39573000	56513000	56035000	62533000	61251000	59675000	64057000	47436000	49257000	48223000	4164800	3933400	4710100
Lmyp004318	595.14	287.06	594.137	C30H26O13	[M+H]+	Kaempferol-3-O-(6''-p-Coumaroyl)galactoside*	Flavonoids	Flavonols	-	2	9	9	9	540020	512190	129070	1125100	1579600	1280500	6247000	8731900	5135900	7383100	4470400	5540100	11299000	11874000	6536400	25758000	19216000	22345000	50352000	43599000	52739000	52096000	54447000	52477000	53294000	51202000	53079000	48488000	50190000	47918000	5548900	5028300	6493200
pmp001106	595.17	577.16	594.158	C27H30O15	[M+H]+	vitexin-2''-O-glucoside*	Flavonoids	Flavonoid carbonoside	61360-94-9	1	78845	27883	32904	2979000	2819500	1493800	3555500	4388100	5777200	14792000	12671000	10561000	19437000	17085000	18229000	23626000	21390000	17011000	24989000	24509000	26993000	9212400	9950400	9617300	15249000	13427000	10666000	16072000	14184000	12413000	12276000	14047000	12173000	3410400	3632900	2459900
Lmnp002413	595.17	449.11	594.158	C27H30O15	[M+H]+	Luteolin-6-C-rhamnoside-7-O-glucoside	Flavonoids	Flavonoid carbonoside	-	2	46868	24811	19466	434390	738590	118520	846860	2407100	3238200	15705000	14210000	10591000	32718000	27306000	30556000	34334000	36663000	35451000	25999000	28445000	21615000	411960	330310	170710	179840	39082	60908	696390	510880	602050	3465000	3734900	5576500	246700	350850	243150
Lmnp102682	595.17	463.13	594.158	C27H30O15	[M+H]+	Hispidulin-8-C-(2''-O-xylosyl)glucoside	Flavonoids	Flavonoid carbonoside	-	3	4641.1	3777.2	7421.3	1375900	1140400	541520	3451800	4416700	4373100	8026900	10914000	14682000	8595900	6940500	7461700	11482000	8315300	6957600	8745300	5416600	10352000	47856	83573	74084	88215	154460	82559	407850	176550	78406	24095	50040	15630	27944	57452	35870
mws1073	595.17	457.2	594.158	C27H30O15	[M+H]+	Apigenin-6,8-di-C-glucoside (Vicenin-2)	Flavonoids	Flavonoid carbonoside	23666-13-9	1	20815	11411	18548	2112400	2368400	1264500	2934900	4168900	4232500	11241000	10089000	10508000	18236000	14560000	18332000	19903000	18477000	16547000	22963000	22136000	22820000	8010500	6950900	6503900	12786000	10710000	8758000	12742000	11711000	11450000	9651000	11647000	10334000	2925600	3187100	1948500
MWSHY0061	595.16	287.06	594.158	C27H30O15	[M+H]+	Kaempferol-3-O-neohesperidoside*	Flavonoids	Flavonols	32602-81-6	3	62488	11050	20576	443670	573440	167200	945870	2574200	4595300	17971000	15842000	11796000	33925000	38774000	32120000	42782000	41507000	40342000	29397000	32873000	23797000	491790	269750	168550	196350	60129	41629	605560	589800	673250	3933900	4108700	5903300	9	9	9
MWSHY0080	595.17	287.06	594.158	C27H30O15	[M+H]+	Luteolin-7-O-neohesperidoside (Lonicerin)*	Flavonoids	Flavones	25694-72-8	3	59659	28338	11892	50301	66762	9	9	194790	9	539260	316250	343670	4429000	2803000	3108800	7894700	3822900	2524300	665760	9	495690	104970	148580	112730	279190	150890	286600	1110600	1030800	833570	1632500	3063800	1437900	41805000	37025000	25353000
pmp000593	595.17	449.1	594.158	C27H30O15	[M+H]+	Luteolin-7-O-rutinoside*	Flavonoids	Flavones	3563-98-2	3	51462	11016	8360.9	359050	599600	95752	666430	2086900	2867500	12058000	12518000	9068100	29316000	30331000	31484000	37532000	40076000	35583000	26828000	23793000	21007000	371270	172050	165500	180460	31454	26282	503040	322850	559790	3646900	3197900	4291800	9	243940	204060
pme1665	593.15	311	594.158	C27H30O15	[M-H]-	Isovitexin-7-O-glucoside(Saponarin)*	Flavonoids	Flavonoid carbonoside	20310-89-8	1	21409	25045	15801	126380	125870	89423	140000	198090	213570	5387000	825160	656140	21170000	4559600	9055900	15802000	8407000	7353900	1836600	1581800	1515500	358730	307470	281860	479880	456920	293230	577680	554500	521060	479780	509750	506910	93227	110470	97011
Lmgp004152	595.17	445.11	594.158	C27H30O15	[M+H]+	Diosmetin-8-C-(2''-O-arabinosyl)glucoside	Flavonoids	Flavonoid carbonoside	-	3	9	9	9	664600	563350	268250	1904400	1908700	2589000	5241600	6829300	8948900	6177500	5494300	5507500	8446700	6031900	4963700	4621600	3801000	4938700	51981	45266	23856	77493	82425	45723	214500	91445	82978	20427	21744	17646	25524	38457	13637
MWSHY0050	595.17	287.05	594.158	C27H30O15	[M+H]+	Kaempferol-3-O-rutinoside(Nicotiflorin)*	Flavonoids	Flavonols	17650-84-9	3	66595	39469	23219	47270	47558	17379	34755	139920	9	565770	245870	317160	4046500	2562600	3077400	3893800	3272200	2725100	281320	9	484490	110850	120240	140670	191460	47654	275250	1115400	1244000	998090	1682000	3111800	1297400	40016000	37063000	23457000
mws0791	593.19	285	594.195	C28H34O14	[M-H]-	Poncirin (Isosakuranetin-7-O-neohesperidoside)	Flavonoids	Flavanones	14941-08-3	1	3472.7	11072	3585.4	512710	458100	104990	941900	1422600	1004000	4184200	7104100	3851600	5433400	3443700	4201300	10391000	8838600	5369900	25908000	17871000	23293000	53846000	34033000	48976000	59436000	60955000	65599000	60534000	64000000	61140000	54155000	54124000	52208000	4402800	4253900	5209300
MWSslk252	593.19	285.08	594.56	C28H34O14	[M-H]-	Didymin	Flavonoids	Flavanones	14259-47-3	2	4612.3	7912.2	986.69	413980	333850	107420	773080	1189800	808280	3197300	4990300	3512200	4864100	3003100	3035400	7819300	6703800	4170500	21904000	16984000	19104000	47352000	28378000	39111000	38697000	54506000	30014000	36536000	32685000	40296000	46571000	50563000	50564000	4160500	3911100	5379800
Lmyn005006	595.15	287.06	596.153	C30H28O13	[M-H]-	"Eriodictyol-7-O-(6""-O-p-coumaroyl)glucoside"	Flavonoids	Flavanones	-	3	9	9	9	14865	10118	3955.4	20360	29760	24299	80925	129960	92521	105950	80005	90895	205980	195080	112770	598660	424410	435820	1380700	767740	1105900	2387500	2324400	2497400	3792700	2834200	3452400	1590600	1966200	1944300	93577	91623	121740
MWSHY0092	597.18	289.07	596.174	C27H32O15	[M+H]+	Eriodictyol-7-O-Rutinoside (Eriocitrin)	Flavonoids	Flavanones	13463-28-0	2	5394.2	9	3853.6	395300	506720	102690	400190	824240	685140	2408200	2069700	1166100	2326800	2280300	2178500	3207400	3118800	2722300	2465100	2132300	1829000	4170100	3820300	4599200	4222400	4381800	4912600	4888900	5944000	4954000	4257000	6253400	4491300	626320	531710	436490
Hmmn004152	595.17	459.11	596.174	C27H32O15	[M-H]-	Neoeriocitrin	Flavonoids	Flavones	13241-32-2	2	9	9	9	29603	51724	20701	54342	86768	93969	233880	181810	110380	127180	115090	123200	148610	158990	183960	177060	154840	158180	543380	414680	447260	475680	469280	559020	559650	616100	567090	403240	524980	541670	40998	39295	21555
Lmgp004217	609.18	445.11	608.174	C28H32O15	[M+H]+	Diosmetin-8-C-(2''-O-rhamnosyl)glucoside	Flavonoids	Flavonoid carbonoside	98891-92-0	2	1890.7	5753.7	9	50780	49547	29316	137970	175180	150340	813780	641070	577710	820160	546610	570410	1271900	1171200	609620	655870	570090	710580	46755	69975	27723	31546	18969	11461	57846	31592	47855	11734	24079	23298	9	7606	4796
pmb3002	607.17	299	608.174	C28H32O15	[M-H]-	Chrysoeriol-7-O-rutinoside	Flavonoids	Flavones	-	1	60725	16438	16756	16104000	11184000	3896800	14698000	16896000	26845000	6156200	10940000	34171000	46883000	50858000	54309000	43486000	32827000	42243000	41789000	43130000	41735000	277510	144680	74985	145900	70916	81924	977700	707080	771310	6338300	6233400	8159600	967200	1850600	1110600
MWSslk165	609.18	301.08	608.174	C28H32O15	[M+H]+	Diosmetin-7-O-Neohesperidoside (Neodiosmin)	Flavonoids	Flavones	38665-01-9	2	18347	4217.6	17918	2318400	2303700	754360	4236200	4434300	6879100	1451200	2067200	11094000	17440000	23195000	24355000	14594000	12471000	12655000	14256000	12847000	12924000	49564	20152	35899	23943	11248	14961	88923	50506	35024	672170	586870	813770	290580	440280	262380
Hmgp002121	609.18	463.08	608.176	C31H28O13	[M+H]+	Hispidulin-7-O-(6''-O-p-Coumaroyl)Glucoside	Flavonoids	Flavones	-	3	3417.1	9	796	203360	152090	44875	266500	340000	612370	168960	255170	988890	1743000	1715300	2055300	1119800	1229800	1227900	959790	958390	1000600	11387	1825.1	1844.5	3648.5	1823.5	9	3575.8	11847	4601.8	52186	57647	59394	23674	31028	17876
Lmmp000897	611.14	287.05	610.132	C30H26O14	[M+H]+	Gallocatechin-(4α→8)-gallocatechin	Flavonoids	Flavanols	-	2	17814	9	9	9	9	9	9	9	9	13393	10474	19700	184720	149130	421280	396200	140670	492130	9	9	9	9	9	9	9	9	9	9	9	9	18516	51715	49509	23166000	15577000	16419000
Lmbp002592	611.16	287.05	610.153	C27H30O16	[M+H]+	Kaempferol-3,7-di-O-glucoside	Flavonoids	Flavonols	-	3	11021	9	9089.3	14827	40167	8622.4	33010	159150	59539	629490	412370	688260	4992800	3532500	2834400	9075800	3045600	2485400	1028400	196690	654880	26266	20851	14213	9	9	9	57140	38252	131720	26782	12716	12045	9	9	9
mws0059	609.15	301	610.153	C27H30O16	[M-H]-	Quercetin-3-O-rutinoside (Rutin)*	Flavonoids	Flavonols	153-18-4	1	12488	31437	7854	9	9	9	288320	1041000	661450	7121200	5417200	4308300	5475600	3678400	6463400	13001000	10607000	7280100	9953000	4690900	13158000	312920	141890	205150	9	9	9	9	9	9	949160	1327900	1142200	2753900	3159500	1197000
Zmjp003031	611.16	449.11	610.153	C27H30O16	[M+H]+	orientin-2''-O-galactoside*	Flavonoids	Flavonoid carbonoside	-	3	9	9	9	22036	14699	13633	27386	31399	27832	128930	193050	169450	134970	157650	210420	401320	209750	177410	484970	417680	428170	9	9	9	9	9	9	9	9	9	49735	55033	39519	9	9	9
pmb0665	611.16	465.1	610.153	C27H30O16	[M+H]+	orientin-7-O-glucoside*	Flavonoids	Flavonoid carbonoside	-	3	9	2747.2	9	32926	39469	10002	23041	69506	97988	1158600	649300	463660	587110	385920	584050	1353200	1146800	809380	1126700	921610	1227500	9	9	62910	61477	9	9	432190	450910	344660	401160	441400	356620	714080	631510	346940
Lmmp003091	611.16	303.05	610.153	C27H30O16	[M+H]+	Quercetin-3-O-(4''-O-glucosyl)rhamnoside	Flavonoids	Flavonols	59262-54-3	2	9	9	9	9	9	9	9	9	9	24581000	38053000	33353000	48025000	30072000	34038000	22784000	39703000	43843000	24520000	19869000	40230000	9	9	9	45588000	40816000	32743000	9	9	9	9	9	9	9	9	9
Lmbp002336	611.16	303.05	610.153	C27H30O16	[M+H]+	Quercetin-3-O-(2''-O-rhamnosyl)galactoside	Flavonoids	Flavonols	-	3	9	9	9	74503	111400	44795	148300	251920	503470	472680	493260	689570	473790	3191300	3533700	4057400	4374400	4985700	1822300	1410100	1953800	123810	62747	108760	292760	231200	349700	298040	233810	188890	63383	135090	75272	99196	244910	117950
Lmjp002461	611.16	303.05	610.153	C27H30O16	[M+H]+	Quercetin-3-O-neohesperidoside*	Flavonoids	Flavonols	117611-67-3	1	9	3337.3	9	692410	495370	111260	1219100	1287300	2009400	2133000	2296900	3311900	3348600	4001400	3316400	3705200	3519500	2987100	1973600	1610000	2630900	5540900	3904000	8141000	4132000	3090800	5484500	4641600	3691700	5096100	1446800	2059800	1460400	93398	231510	99547
Zmhp002409	611.16	491.12	610.153	C27H30O16	[M+H]+	IsoLuteolin-6,8-di-C-glucoside	Flavonoids	Flavonoid carbonoside	-	3	9	9	9	736560	1096700	652290	1035600	1583400	2008500	4918900	3221000	2399600	3573100	3799600	3360400	5702200	6049400	4990400	8632100	6170000	10224000	591450	606930	412710	366630	295400	209290	807460	762230	723260	336670	486460	286580	71439	104980	58582
Zmxp003107	611.16	287.06	610.153	C27H30O16	[M+H]+	Luteolin-7,3'-di-O-glucoside	Flavonoids	Flavones	52187-80-1	3	9	9	9	9	28673	13311	7977.5	151240	78313	731050	468650	639180	4999800	2750000	2808900	7404800	2622500	2617000	907130	196690	612790	13452	34214	20088	18828	24131	18300	47848	37363	119350	10741	20543	8268.3	138220	162140	105020
HJAP024	611.16	593.15	610.154	C27H30O16	[M+H]+	Kaempferol-6,8-di-C-glucoside	Flavonoids	Flavonoid carbonoside	-	3	9	9	9	1088500	1674000	944030	1459600	2248900	2237900	4763500	4375100	3034700	4466800	5153100	4089200	7107000	7356300	6487800	11898000	9505500	11373000	817940	754110	490400	432450	483220	261590	976260	913690	960980	424280	630170	386350	122980	136890	77355
pme0001	609.18	301	610.19	C28H34O15	[M-H]-	Hesperetin-7-O-neohesperidoside(Neohesperidin)*	Flavonoids	Flavanones	13241-33-3	1	1749.2	2933.5	583.73	1209000	753890	263950	904870	1404900	1567500	2185500	2506900	2597700	2559100	2295100	2264000	2478300	2884300	3162900	2795100	3092200	3032500	2949000	2385700	2503500	2586800	2961800	2900000	2859200	3174700	2906700	3308400	3231900	3244600	217250	627890	78507
mws0036	609.18	301.09	610.19	C28H34O15	[M-H]-	Hesperetin-7-O-rutinoside (Hesperidin)*	Flavonoids	Flavanones	520-26-3	1	1701.1	1696.2	2260.7	1150900	674230	246090	862470	1544400	1577800	1854500	2603500	2723200	2247700	2181700	2155600	2500200	2733400	2447600	2702700	3058800	3133200	2539300	2513400	2479500	2824300	2614600	2774500	2685100	3155900	2919200	2977200	3316600	3574000	236790	615790	79725
Rfmb26201	621.22	417.16	622.226	C30H38O14	[M-H]-	syringaresinol-4'-O-(6''-acetyl)glucoside	Lignans and Coumarins	Lignans	-	2	619380	154490	238200	758360	382460	514190	386200	385330	214320	787500	329530	156940	1107400	341840	367690	1437200	522300	375730	329540	495430	484270	1384600	2720200	1882500	2071100	4288900	3343100	1914000	3120700	2457200	115250	447810	156190	240170	904900	63032
pmp000241	625.14	505.09	624.133	C27H28O17	[M+H]+	Luteolin-6-C-(2''-glucuronyl)glucoside	Flavonoids	Flavonoid carbonoside	-	2	14102	13097	2720.1	4285000	6117100	3265700	4973500	6826800	5636100	20668000	14120000	11691000	17642000	14548000	15279000	22555000	20787000	16105000	22303000	17853000	21004000	3333600	3298600	2083900	2860000	861370	1634000	3110900	2405800	2029800	617950	1053300	722670	606690	644110	481820
Hmlp004943	625.18	317.07	624.168	C28H32O16	[M+H]+	Nitensoside B	Lignans and Coumarins	Coumarins	-	2	55392	105630	4698.8	7225200	11180000	3550600	6336800	10386000	5069800	8996000	7150900	5649400	6036700	7764500	7345800	11365000	10326000	9006100	10059000	7857000	10041000	807050	748260	471010	645640	517170	418840	5760600	4637300	3570900	3241400	6134700	3718400	22051000	24688000	17262000
Zmxp002867	625.17	301.07	624.168	C28H32O16	[M+H]+	Chrysoeriol-5,7-di-O-glucoside	Flavonoids	Flavones	-	3	4223.8	4818.2	7248.5	83058	125550	44536	86438	183210	118900	9	54393	196250	317690	238140	325790	206780	184610	266690	1354100	858980	1472400	69159	25351	48592	22898	14730	10660	96288	78301	69660	443250	482240	496440	72768	56149	41914
HJN051	623.16	315.05	624.168	C28H32O16	[M-H]-	Tamarixetin-3-O-rutinoside*	Flavonoids	Flavonols	-	2	8484.8	12835	9	903760	1378300	496810	777510	1336700	830620	1022900	955490	710570	999100	1468000	1393500	2712700	2299200	1734900	1647300	2100200	1392800	9	9	9	9	9	9	2139000	2136900	1159000	577810	3043000	640790	2768800	3120900	1795400
Lmsp004721	625.18	317.07	624.169	C28H32O16	[M+H]+	Tamarixetin-3-O-glucoside-7-O-rhamnoside*	Flavonoids	Flavonols	-	2	42249	90150	20275	5576800	9558000	4035700	5363100	8983800	4307000	10729000	7274600	4927000	6455600	6217400	7003100	8990900	9514600	8465800	8440900	8037600	9521800	682960	615830	386870	560790	507610	364210	3826600	3869600	3228600	2723400	4742600	2010000	19952000	22042000	13635000
Lmsp004045	625.18	317.07	624.169	C28H32O16	[M+H]+	Isorhamnetin-3-O-glucoside-7-O-rhamnoside*	Flavonoids	Flavonols	-	2	55392	105630	4698.8	7225200	11180000	3550600	6336800	10386000	5069800	8996000	7150900	5649400	6036700	7764500	7345800	11365000	10326000	9006100	10059000	7857000	10041000	807050	748260	471010	645640	517170	418840	5760600	4637300	3570900	3241400	6134700	3718400	22051000	24688000	17262000
Lmmp002963	625.18	317.06	624.169	C28H32O16	[M+H]+	6-C-Methylquercetin-3-O-rutinoside	Flavonoids	Flavonols	-	2	42236	96723	13143	5681900	9734200	3630600	5281200	10031000	5445300	9611200	6799100	4458800	6442000	6644900	7260900	9181000	9797400	6687800	8330200	8594900	9349800	682960	668400	497520	622340	372540	541110	4446900	4645000	3194400	2706600	5165500	2166400	17950000	21663000	13718000
Lmnp002584	625.18	463.13	624.169	C28H32O16	[M+H]+	Hispidulin-8-C-(2''-O-glucosyl)glucoside	Flavonoids	Flavonoid carbonoside	-	2	9	9	9	2336300	2470100	1328900	3104000	3299400	4423600	5769200	7024500	5365700	6083400	8541300	7298300	7151400	6697600	6110700	7534100	7185100	9324900	802750	798670	637880	318370	338660	213790	759160	490340	403120	214080	263090	261480	99736	162930	67793
pmp000127	625.18	607.2	624.169	C28H32O16	[M+H]+	Chrysoeriol-6,8-di-C-glucoside	Flavonoids	Flavonoid carbonoside	-	1	71046	14393	38035	10040000	13680000	7489800	10094000	11860000	12419000	44236000	32387000	25698000	45626000	18086000	33046000	49983000	45676000	36043000	41892000	41101000	44326000	5053400	7333700	2846900	6717800	6452100	3906100	7125600	5325200	4669100	1377700	2225600	1700400	1247100	1520700	1299300
MWSHY0064	625.17	317.07	624.169	C28H32O16	[M+H]+	Isorhamnetin-3-O-neohespeidoside*	Flavonoids	Flavonols	55033-90-4	2	39064	111750	7511.8	5598000	10728000	3223700	6384300	10072000	4467800	10237000	4968800	5205400	6469900	6721200	5598900	11251000	10531000	8710300	8887800	8254000	8421200	668240	699370	473260	452410	487310	488140	4159100	4226100	3017300	2697400	4507400	2813500	19728000	22868000	14585000
Zmhn002574	623.16	315.05	624.169	C28H32O16	[M-H]-	Rhamnazin 3-Glucosyl-Arabinofuranoside	Flavonoids	Flavonols	-	2	2411.3	3277.8	3617.3	915340	254870	81758	730690	1444400	2506400	14785000	9489400	3660500	9374500	5795700	4181300	6175600	5414900	4406900	2090900	3366400	1840000	3048900	2192000	2221200	9590500	8401400	9581400	4416500	2546900	3439000	903320	1362800	1116500	44236	76152	61208
HJAP026	625.18	463.13	624.17	C28H32O16	[M+H]+	Chrysoeriol-6-C-glucoside-4'-O-glucoside*	Flavonoids	Flavonoid carbonoside	-	2	9	9	9	2402700	2297700	1334600	4071300	3354700	4731800	5206300	6224900	6083700	6664700	7524600	7603000	7305600	7740200	6689900	8428300	8133900	9135700	819870	692810	492790	346120	274520	210340	660300	392920	542980	168520	306080	230490	94578	183590	128170
Lmcn005735	623.2	315.08	624.205	C29H36O15	[M-H]-	Methylhesperidin	Flavonoids	Flavanones	11013-97-1	2	3192.8	1460.6	2108.5	901770	246440	76952	716570	1486000	2400300	14038000	9060000	3167700	8282600	4674600	5008000	6835800	4945200	4252000	2124500	2979300	1654000	2983400	1836200	2210600	9884100	10009000	10838000	4475600	2287400	2816400	873600	1355600	1004500	45313	75557	55228
MWSslk141	625.22	317.1	624.59	C29H36O15	[M+H]+	Hesperidin methylchalcone	Flavonoids	Chalcones	24292-52-2	3	6560.8	31462	4846.4	722940	217880	58168	772410	1613800	2467000	23024000	12951000	4299400	12070000	7802300	6629700	11359000	8753200	7254200	2526700	3846100	1690200	3964400	2850500	2933100	11142000	9871800	12950000	5358900	3305700	4360100	1095300	1733300	1666200	110630	168520	128750
pmp001310	627.16	303.1	626.148	C27H30O17	[M+H]+	6-Hydroxykaempferol-3,6-O-Diglucoside	Flavonoids	Flavonols	-	2	9	9	9	314720	985100	170260	516050	3813900	2924100	11775000	11732000	13319000	11272000	8093800	18785000	26935000	20879000	18839000	20403000	6133700	23914000	83872	55271	37128	69009	54171	50221	43810	36788	69602	30370	20793	46780	25248	22278	15148
Hmlp003068	627.15	303.05	626.148	C27H30O17	[M+H]+	Meratin	Flavonoids	Flavones	27215-04-9	2	9	9	9	13659	17192	9645.7	12556	30831	67064	208680	197290	149310	966270	519870	802540	1489000	853050	898130	1242200	411070	2282600	8983	6203	5421.4	9720.9	9	4303	33058	36416	33302	30054	51853	45114	588800	485780	368780
pmp001311	627.16	303.1	626.148	C27H30O17	[M+H]+	6-Hydroxykaempferol-7,6-O-Diglucoside	Flavonoids	Flavonols	-	3	9	9	9	25394	22301	7241.3	23932	60722	81218	267590	220020	302160	934550	408910	1248300	1797800	1087600	1042800	1776800	463760	2144400	9	9	9	9	9	9	39344	49563	47216	51326	65888	50647	878130	582710	558710
pmp000596	627.16	465.1	626.148	C27H30O17	[M+H]+	Quercetin-3-O-(2''-O-galactosyl)glucoside	Flavonoids	Flavonols	56782-99-1	2	10063	9	12891	9	9	9	9	9	9	47153	9	81320	41156	577500	504990	718380	768900	798510	185230	258090	207840	184180	174500	209070	150070	167370	196950	160340	121640	178860	62632	77410	55294	16465	12905	9
Zmcp002666	627.14	303.05	626.148	C27H30O17	[M+H]+	Quercetin3,7-diglucoside	Flavonoids	Flavonols	-	2	9	9	9	17192	10628	10193	18182	46513	52667	321680	172630	138810	882050	476970	1311600	903410	1412300	1194300	2210800	435990	2949900	14623	8860.2	7362.1	10295	2672.6	1980.2	25386	33247	29015	34026	46143	31878	576430	436730	378300
Lmsp003729	627.16	319.05	626.148	C27H30O17	[M+H]+	Myricetin-3-O-rutinoside	Flavonoids	Flavonols	-	2	1318.6	4221.9	9	9	40598	9311.1	25095	48177	31498	1178500	910230	313050	9	744680	862110	2056400	1776000	1021800	522580	934570	730890	94261	93392	119720	149300	149360	106970	1952300	2194700	2144300	1563800	2007100	2304400	340570	600560	270860
pmb0618	627.19	465.1	626.185	C28H34O16	[M+H]+	Hesperetin-8-C-glucoside-3'-O-glucoside	Flavonoids	Flavonoid carbonoside	-	3	9	9	9	9	9	9	32642	45568	33834	205610	195650	212510	577130	452970	852790	643790	970170	826360	1381500	262470	1489300	40615	45651	48415	60630	34240	77532	31361	70560	33655	41232	121460	101680	364220	257070	265780
Zmhp002401	637.18	331.08	636.169	C29H32O16	[M+H]+	Viscumneoside IV(Rhamnazin-3-O-(6''-hydroxymethylglutaryl)glucoside)	Flavonoids	Flavonols	119725-29-0	2	9	9	9	149540	625490	113090	437450	1494000	856370	20419000	12750000	6396600	9641600	8401800	10726000	29663000	15886000	12458000	36495000	29361000	27537000	3572800	2427100	933560	1588600	2319900	467650	892790	916800	622500	161890	272840	156260	9	9	9
Lmgp005868	639.17	301.07	638.164	C32H30O14	[M+H]+	Chrysoeriol-7-O-(6''-feruloyl)glucoside	Flavonoids	Flavones	-	2	9	9	9	9	9	9	12587	8941.3	17854	120760	71053	46884	226120	137080	226630	570420	296740	164280	112850	24886	103070	9	9	9	9	9	9	9	9	9	9	9	9	9	9	9
Hmgp003086	639.19	331.08	638.184	C29H34O16	[M+H]+	Tricin-7-O-rutinoside*	Flavonoids	Flavones	-	2	3097.5	12800	4573.7	283520	243370	86089	625110	585990	905980	1178400	778180	2232000	2011400	2197800	2382600	2052600	1861600	2104100	4880700	5187300	5054700	281320	286530	217320	37353	8343.3	18175	18241	15849	14506	21607	30506	26251	9	9	9
Lmgp004959	639.19	331.08	638.185	C29H34O16	[M+H]+	Tricin-7-O-neohesperidoside*	Flavonoids	Flavones	53766-40-8	2	9	9	9	322260	261570	91883	711960	549730	850950	1198000	709250	2272300	1862600	2026900	2430200	1827900	1675800	2196900	5101000	5311400	5116900	288900	325090	199310	36523	6675.3	9	26148	15015	18771	25431	37099	39077	9	9	9
Hmcp001578	641.17	479.11	640.163	C28H32O17	[M+H]+	Isorhamnetin-3,7-O-diglucoside	Flavonoids	Flavonols	6758-51-6	1	71131	51439	69421	78558	118620	63891	71634	151230	135290	91260	98192	94706	189340	150520	188180	1082900	277140	260400	477330	105940	715210	30134	24986	13365	44327	21500	16137	142190	141000	84866	116780	178940	111750	676390	843620	601200
Hmgp001888	641.17	317.06	640.167	C28H32O17	[M+H]+	Patuletin-3-O-rutinoside	Flavonoids	Flavonols	-	2	9	9	9	664500	3059200	828550	1385400	2251300	3082700	2518400	2617700	2983500	770740	1342200	2419800	3113200	3133500	2925300	1666100	587630	2556000	20113	14348	13294	47863	36055	36432	132910	18242	81540	39896	25698	62024	367690	301240	290780
pmp000128	653.17	347.1	652.164	C29H32O17	[M+H]+	Limocitrin-3-O-(3-hydroxy-3-methylglutarate)glucoside	Flavonoids	Flavonols	-	1	3785.5	2310.1	3783	153490	102370	15886	170130	262380	140620	10360000	5232700	1856300	3795800	2925400	2791200	8032000	6441100	3832200	1853900	1191200	1616000	269450	212310	71280	210200	161510	43070	314550	199730	118990	65223	65033	19198	998010	925730	1011300
pmb0713	655.19	331.08	654.18	C29H34O17	[M+H]+	tricin-7-O-(2''-O-glucosyl)glucoside	Flavonoids	Flavones	-	2	9	9	9	36437	56357	12551	47394	44909	40353	20916	29757	87890	44921	49158	55940	150690	37999	70754	3692400	4083200	6162800	454130	196710	303150	95744	92855	52626	43226	68065	74498	21479	27971	24696	7626.4	8302.5	10041
Lmsp004749	655.19	347.08	654.18	C29H34O17	[M+H]+	Syringetin-3-O-rutinoside	Flavonoids	Flavonols	-	2	9	9	9	292850	323870	97357	265740	426310	303680	3242200	2119800	1457400	2102600	2892400	2365200	2658500	2629900	2515700	529300	432320	481850	91162	77068	54195	16456	24456	8330.5	38260	15838	15804	8234.2	11243	4638.1	105430	66673	35006
pmb0719	659.2	331.08	658.19	C32H34O15	[M+H]+	Tricin-4'-O-(syringyl alcohol)ether-5-O-glucoside	Flavonoids	Flavones	-	2	9	9	9	9	9	9	9	9	9	9	9	9	9	9	9	9	9	9	571700	600340	625660	88867	68288	47743	22927	9879.4	4595.3	18372	23052	23992	1573.6	6140	3547.8	9	9	9
pmp001081	667.19	361.09	666.18	C30H34O17	[M+H]+	Sudachiin B	Flavonoids	Flavones	98891-96-4	1	2561.8	2263.4	4537.7	143360	237080	41703	194560	611260	344940	5156700	2807000	1795300	3071400	2419900	2365700	6361100	3902500	2761700	14302000	10038000	11662000	1441900	1371300	486330	655280	935680	174470	246410	302770	200510	27798	74568	29010	19721	15767	18391
pmp001082	667.19	361.09	666.18	C30H34O17	[M+H]+	Sudachiin C	Flavonoids	Flavones	101339-35-9	1	2561.8	2263.4	4537.7	143360	237080	41703	194560	611260	344940	5156700	2807000	1795300	3071400	2419900	2365700	6361100	3902500	2761700	14302000	10038000	11662000	1441900	1371300	486330	655280	935680	174470	246410	302770	200510	27798	74568	29010	19721	15767	18391
Hmcp001628	671.18	347.07	670.175	C29H34O18	[M+H]+	Limocitrin-3,7-di-O-glucoside	Flavonoids	Flavonols	-	2	9	9	9	46314	16253	10387	35624	25901	13365	39631	44309	38079	70556	126210	95679	72305	63203	75598	257700	415870	692910	138250	87590	63659	18456	15001	5228	9214.4	10004	13501	9	9	9	41883	47391	49784
Hmgp001916	671.18	347.07	670.177	C29H34O18	[M+H]+	3,3',5,7-Tetrahydroxy-4',6-Dimethoxyflavone-7-O-Gentiobioside; (Laciniatin-7-O-Gentiobioside)	Flavonoids	Flavonols	-	2	6209.1	9	9	64433	229730	48708	125380	329230	359840	5406500	3382900	1543600	2321900	3364400	2070400	5979200	6044500	4942500	167600	180410	259860	28667	14831	18545	13757	5169.4	4566.1	13190	12982	7745.2	4436	6023.4	4401.5	18645	20063	26037
Hmcp001629	697.16	449.1	696.153	C30H32O19	[M+H]+	Kaempferol-3-O-(6''-Malonyl)glucoside-7-O-Glucoside	Flavonoids	Flavonols	-	2	16851	1814.1	3590.4	9	9	9	9	9	9	9	9	9	17404	9	12235	9	9	9	9	9	9	9	9	9	9	9	9	9	9	9	9	9	9	19878000	10697000	14285000
pmp001083	704.4	686.39	703.39	C34H53N7O9	[M+H]+	Citrusin I	Alkaloids	Alkaloids	139626-28-1	1	9	9	9	4292000	8897400	6792200	6299800	11033000	8851000	10050000	14615000	21458000	21613000	30417000	34381000	30747000	33262000	32793000	2983100	3507000	4369400	8245300	11648000	10467000	11143000	12470000	10460000	18827000	11532000	12247000	2076900	3515300	2895500	325710	388790	378180
pmp000129	725.23	419.1	724.221	C33H40O18	[M+H]+	Natsudaidain-3-O-(3-hydroxy-3-methylglutarate)glucoside	Flavonoids	Flavonols	-	1	4042.1	1024.3	3651.7	369470	321100	115700	468970	891030	467450	4187900	2469300	2378600	3537900	3974900	4119000	1999400	3270100	3091400	9218500	9775200	6784800	1955100	1105100	383360	1107200	1334700	281600	930450	935900	369550	232310	365870	85968	150420	60413	135710
Zmlp003063	741.23	433.12	740.209	C33H40O19	[M+H]+	Luteolin-7-O-(2''-O-rhamnosyl)rutinoside	Flavonoids	Flavones	-	2	9	9	9	78795	48287	22245	154590	122320	150680	469740	448540	581090	4312500	1851000	3286000	2619000	2389900	1682600	1733600	2183700	1093000	20187	17603	8444.8	61582	40574	20651	546220	354540	291170	243410	246930	285400	9	9	9
pmb2981	739.21	563.2	740.216	C33H40O19	[M-H]-	Vitexin-7-O-rutinoside	Flavonoids	Flavonoid carbonoside	-	2	74370	188890	64512	69763	188540	203910	108150	252400	176200	194890	196930	310900	60007	34477	38003	40313	46157	35166	19464	17467	15090	17307	21815	24800	59202	56497	44484	11384	500.99	3693.2	9	9	9	9	9	9
Lmsp003881	741.22	287.06	740.216	C33H40O19	[M+H]+	Kaempferol-3-O-rutinoside-7-O-rhamnoside	Flavonoids	Flavonols	-	3	2663	9	9	864.66	841.77	2616.8	3401.5	19492	16315	52372	36833	50883	388680	309340	379690	601460	294260	205070	39812	22790	9209.3	5088.4	11868	1515	14550	11164	26183	249490	160360	142470	300870	535620	441940	1145500	610830	247300
Lmzn001875	741.23	579.18	742.232	C33H42O19	[M-H]-	Naringenin-7-O-Rutinoside-4'-O-glucoside	Flavonoids	Flavanones	-	2	144390	166350	236150	89779	61469	165840	126680	45935	57965	9	9	9	9	9	9	9	9	9	26038	44167	43437	9	16204	21961	9	69575	53122	317180	232730	282070	51224	35615	9	235600	297130	304170
pmb0639	757.22	595.2	756.211	C33H40O20	[M+H]+	Apigenin-8-C-glucoside-7-O-Sophoroside	Flavonoids	Flavonoid carbonoside	-	3	9	9	9	9	9	9	9	9	9	45137	45229	60916	112310	61275	78010	129270	100510	87260	9	259750	191090	9	9	9	9	9	9	9	64588	9	48149	41395	9	2030300	1827200	1566500
pmb0691	757.22	431.4	756.211	C33H40O20	[M+H]+	Isoorientin-7-O-(2''-rhamnosyl)glucoside	Flavonoids	Flavonoid carbonoside	-	3	568.64	1149.3	1768.9	10523	5231.3	2924.6	35961	36062	29694	69925	83549	114880	195670	192820	166360	143920	154950	174800	1009500	1520800	782480	8210.6	1752.7	5366.8	4549.4	9	1746.8	10805	12052	7589	4070.5	4614.7	2907.3	63332	72318	51233
Lmpp003268	757.22	287.06	756.211	C33H40O20	[M+H]+	Kaempferol-3-O-rutinoside-7-O-glucoside*	Flavonoids	Flavonols	-	3	9	1459.5	1488	8778.4	19630	8839.4	8913	25445	23524	31609	84318	96675	533000	644850	490000	641670	350180	321940	50884	28067	35846	9	5137.1	4458	8001	9577	13143	181000	172050	273490	312620	318360	363510	9	205680	221310
Lnrp102163	757.21	303.05	756.211	C33H40O20	[M+H]+	Quercetin-3-O-rutinoside-7-O-rhamnoside*	Flavonoids	Flavonols	-	2	923.26	1812.9	9	9	9	9	1777.3	4543.1	2682.6	16971	12807	11019	17379	11022	21114	72565	63710	22158	31097	10934	33840	9	9	9	9	9	9	9	9	9	9	9	9	3685.7	6405.2	1902.5
pmp001105	757.22	287.06	756.211	C33H40O20	[M+H]+	Kaempferol-3-O-neohesperidoside-7-O-glucoside*	Flavonoids	Flavonols	-	3	9	4666	1679.6	9	9	9	9	9	5851	15245	9	17935	100990	98330	64784	151390	66154	56681	29948	9	14054	9	9	9	9	9	9	62933	56421	42738	153830	237720	171400	9879500	8153300	5790200
HJAP127	757.22	303.05	756.212	C33H40O20	[M+H]+	Quercetin-3-O-(2''-O-Rhamnosyl)rutinoside*	Flavonoids	Flavonols	55696-57-6	2	9	9	1403.7	54971	65081	40111	194030	314810	810710	797100	697420	1066500	540690	1163800	865170	933470	1043300	784390	2679900	2155400	2859900	10849	8617.3	9	9800.7	7177.9	8710.4	64266	51402	43620	38562	82830	64725	339870	557640	138330
pmn001505	763.43	763.4	764.435	C41H64O13	[M-H]-	Oleanolic acid-3-O-xylosyl(1→3)glucuronide	Terpenoids	Triterpene Saponin	-	2	5737700	5131300	3074500	1276400	1242500	1152400	741990	1296800	1346800	355380	487660	402650	219780	207470	158620	83204	88685	81954	17652	19979	19057	82688	89881	77726	533980	899070	616790	35566	40458	22189	9	9	9	9	9	9
pmb0672	771.21	463.1	770.206	C37H38O18	[M+H]+	Isovitexin-7-O-(6''-feruloyl)glucoside	Flavonoids	Flavonoid carbonoside	-	2	2766.7	2789.6	6572.3	39369	37534	7595.8	129930	62336	77576	16708	25357	136160	555360	558760	679110	191920	354660	460320	130480	234960	91977	15026	8450.3	16804	31763	21879	25392	9	12232	9	5634.8	7567.8	8292.9	14891	9	10252
HJAP119	771.22	317.06	770.226	C34H42O20	[M+H]+	Rhamnetin-3-O-Rutinoside-5-O-rhamnoside*	Flavonoids	Flavonols	-	3	891.57	9	1821.9	246360	142140	49970	392210	264950	1103300	266910	358600	635690	312340	501400	477860	477270	509130	405220	532800	591780	882110	19779	35755	35755	113360	96435	492290	1551700	834730	933040	483090	650840	492970	8381800	8235700	5502300
HJAP128	771.23	317.06	770.227	C34H42O20	[M+H]+	Isorhamnetin-3-O-rutinoside-7-O-rhamnoside*	Flavonoids	Flavonols	-	3	884.53	760.79	9	315950	240630	79122	454690	206750	1160500	306430	365720	842610	340460	466850	511000	514140	568470	347210	683390	409860	763000	17200	30527	25291	140960	92858	540190	1627900	738720	824040	449650	795270	485050	8428000	8808400	6322400
Zmcn004206	771.18	609.14	772.185	C36H36O19	[M-H]-	kaempferol-3-caffeoyldiglucoside	Flavonoids	Flavonols	-	2	9	9	9	73842	53189	23076	104920	102820	163120	203190	124440	207020	182570	245130	178740	303170	204270	179150	164840	160150	195400	580190	400480	696870	629640	471700	625010	451930	324740	460410	133190	122200	202530	10942	10613	14939
Lmmp002755	773.21	303.05	772.206	C33H40O21	[M+H]+	Quercetin-7-O-rutinoside-4'-O-glucoside*	Flavonoids	Flavonols	-	3	1609.2	9	2516	33056	27509	9	42679	87864	117230	125580	136910	270420	204230	250020	139490	255290	189960	172410	105890	96030	123600	266930	193400	383580	246080	159520	333200	257960	173160	206610	89211	110490	135250	31081	38868	17169
pmp001314	773.21	627.2	772.206	C33H40O21	[M+H]+	6-Hydroxykaempferol-3-O-rutin-6-O-glucoside	Flavonoids	Flavonols	-	3	9	9	9	83187	35672	16451	108020	61345	161940	104420	181560	306380	416700	395500	400410	429160	416140	577010	258500	285410	230460	37706	76027	49615	26243	39839	36728	42826	21292	33351	9	9	32482	35082	9	24579
Lmmp002334	773.21	303.05	772.206	C33H40O21	[M+H]+	Quercetin-3-O-rutinoside-7-O-glucoside*	Flavonoids	Flavonols	-	3	9	9	9	41068	66712	29038	84513	260820	542790	353500	549580	737650	549500	584520	688600	1145700	792870	823030	990320	732460	1038900	43789	32801	41364	9	9	9	137150	61136	118310	92965	93700	91192	40318	39221	26756
HJAP023	773.22	611.17	772.207	C33H40O21	[M+H]+	Kaempferol-6,8-di-C-glucoside-7-O-glucoside	Flavonoids	Flavonoid carbonoside	-	2	9	9	9	16793	8330.1	4106.1	12952	22087	21843	27576	57203	59827	122530	105130	159000	252000	200500	155950	318060	169880	354500	9	9	9	9	9	9	24875	28711	24362	18775	33157	22306	99979	99207	66682
Lmhp003162	787.23	625.17	786.222	C34H42O21	[M+H]+	Chrysoeriol-6,8-di-C-glucoside-4'-O-glucoside	Flavonoids	Flavonoid carbonoside	-	2	9841.2	5862.3	20129	91576	100690	73844	148270	134740	244450	64439	127820	346460	394270	575000	567570	383460	517210	455330	251390	180460	198390	14849	16319	8199.3	15346	12835	12225	248180	220540	103720	101250	165140	116330	261270	308310	203020
mws1150	785.25	623.2	786.258	C35H46O20	[M-H]-	Echinacoside	Phenolic acids	Phenolic acids	82854-37-3	2	9	9	9	145780	247710	68606	164160	320450	253450	143080	159060	255460	461710	394110	439730	836780	494500	436980	248990	140820	296980	45459	21149	21363	70864	39730	57443	1182700	1008700	825480	671570	894630	580410	1474300	1743200	1254300
pmp000130	887.28	725.2	886.274	C39H50O23	[M+H]+	Natsudaidain-3-O-(5'-glucosyl-3-hydroxy-3-methylglutarate)glucoside	Flavonoids	Flavonols	-	1	9	9	9	9	9	9	9	9	9	3247.9	8487	13014	8565.3	23867	27920	12108	23298	25125	4234800	4862200	4053400	422070	238460	175860	118750	152630	79061	95906	131490	96804	11875	28107	15045	3143.6	4569.6	6352.6
