# Supplementary material for: Metabolome and Transcriptome Analysis Revealed the Basis of the Difference in Antioxidant Capacity in Different Tissues of Citrus reticulata ‘Ponkan’
Source: Antioxidants (Basel). 2024 Feb 18;13(2):243. doi: 10.3390/antiox13020243 (PMC10886001; doi:10.3390/antiox13020243)
Supplement: Supplementary file 1 [file antioxidants-13-00243-s001.zip › Table S2-proof.xlsx]

## Sheet: sheet1
Table S2. List of the metabolites in the 9 clusters of Figure 2F.
Cluster 1	Cluster2	Cluster3	Cluster4	Cluster5	Cluster6	Cluster7	Cluster8	Cluster9
2-Hydroxy-3-phenylpropanoic acid	6-Deoxyfagomine	4-Hydroxybenzaldehyde	Salicylic acid	N-Benzylmethylene isomethylamine	4-Methylbenzaldehyde	N-benzylformamide	Methyl cinnamate	4-Nitrophenol
2,6-Dimethoxybenzaldehyde	5-Hydroxyquinoline	3,4-Dihydroxybenzoic Acid (Protocatechuic acid)	Vanillin*	5-hydroxymethylfurfural	Griffonilide	7-Hydroxycoumarin	Isovanillic acid	α-Hydroxycinnamic acid
N-(2-Hydroxy-4-methoxyphenyl)acetamide	2,6-Di-tert-butylphenol	3-(2-(Methylamino)ethyl)-1H-indol-5-ol	Isovanillin*	4-Guanidinobutanal	Coniferyl alcohol	p-Coumaric acid methyl ester	2,4,6-Trihydroxybenzoic acid	Synephrine
Isoscopoletin (6-Hydroxy-7-Methoxycoumarin)*	5,6,7-Trimethoxycoumarin*	Bergapten	2,6-Dihydroxyacetophenone	4-Aminobenzoic Acid	Ferulic acid*	Genipin	Gentianamine	7-Methoxycoumarin
Scopoletin (7-Hydroxy-6-methoxycoumarin)*	S-(+)-Marmesin	Demethylsuberosin	4-Methoxycinnamaldehyde	2-Amino-4,5-dihydro-1H-imidazole-4-acetic acid	Isoferulic Acid*	p-Coumaroylputrescine	Methyl dioxindole-3-acetate	3-amino-2-naphthoic acid
Dictamnine	Sibiricol	Osthole	Gallacetophenone	N-(4-Aminobutyl)benzamide	Ferulic acid methyl ester	Butyl Beta-D-Fructopyranoside	5,7-dimethoxy-8-hydroxycoumarin	1-Methoxy-indole-3-acetamide
Clove chromone	Vidarabine	N-Isobutyl-2E,4E-dodedienamide	Caffeic acid	Methyl caffeate	Sideretin (5,7,8-Trihydroxy-6-methoxycoumarin)	Salicin	isofraxidin	3,4'-Dihydroxy-3'-methoxybenzenepentanoic acid
5,7-Dimethoxycoumarin (Limettin)(Citropten)	p-Coumaroyltyramine	7-Methoxy-5-Prenyloxycoumarin	p-Coumaroylmalic acid	Paniculidine B	Sinapic acid	4'-Hydroxy-5,7-dimethoxyflavanone	3,4'-Dihydroxy-3',5'-dimethoxypropiophenone	Daphnin
Sinapyl alcohol	Isoscutellarein	Auraptenol	Stearamide	Tricetin (5,7,3',4',5'-Pentahydroxyflavone)	Arbutin	Feruloylmalic acid	Rutaretin	Esculin (6,7-DihydroxyCoumarin-6-glucoside)
Methyl 3-(3-hydroxy-4-methoxyphenyl)propanoate	3,5,7,4'-Tetrahydroxy-Coumaronochromone	Meranzin	4-O-Glucosyl-4-hydroxybenzoic Acid*	Homoeriodictyol	O-Feruloyl coumarin	3,4-dihydroxyphenylethanol-β-D-glucopyranoside	N-Feruloylputrescine	Esculetin-7-O-glucoside
Dictangustine A	1-O-galloyl-β-D-glucose	4,4'-Dihydroxy-2'-methoxychalcone (3-Deoxysappanchalcone)	1-O-Salicyloyl-β-D-glucose*	Isopimaric acid*	Mearnsetin	Jasminoside C	Benzyl glucoside	Pinoresinol*
Benzoylmalic acid	Luteolin-8-C-arabinoside	Isoimperatorin	4-O-Glucosyl-3,4-dihydroxybenzyl alcohol	Pimaric acid*	Sinapoyl-4-O-glucoside*	1-O-(3,4-Dihydroxy-5-methoxy-benzoyl)-glucoside	Phloroglucinol-1-O-β-D-glucopyranoside	Epipinoresinol*
Suberosin	Liquiritigenin-4'-O-Glucoside (Liquiritin)*	Naringenin chalcone	Methyl salicylate-2-O-glucoside	Quinacyl syringic acid	Citroside A	Scopoletin-7-O-glucoside (Scopolin)	1-O-Gentisoyl-D-glucoside	Methylpicraquassioside A
cinnamoyltyramine	Isoliquiritin*	Naringenin (5,7,4'-Trihydroxyflavanone)	5-(2-Hydroxyethyl)-2-O-glucosylphenol	Luteolin-7-O-glucoside (Cynaroside)	Sinapoylglucuronic acid	Sweroside	Protocatechuic acid-4-O-glucoside	Lirioresinol A
Apigenin	O-MethylNaringenin-8-C-arabinoside	Pinobanksin	(2E)-3-[4-(β-D-glucopyranoside)-phenylacrylic]-acid	Mangiferolic acid*	Eriodictyol-3'-O-glucoside*	scopoletin-7-O-glucuronide	Vanilloloside	Kaempferol-7-O-rhamnoside*
Galangin (3,5,7-Trihydroxyflavone)	Quercetin-3-O-rhamnoside(Quercitrin)	Bergamottin	Vanillic acid-4-O-glucoside	Isomangiferolic acid*	Dihydrokaempferol-7-O-glucoside	Skullcapflavone II	N-Oleoylethanolamine	Kaempferol-3-O-rhamnoside (Afzelin)(Kaempferin)*
3,7-dihydroxy-4'-methoxyflavone	Eriodictyol-7-O-glucoside*	6',7'-Dihydroxybergamottin	3-O-p-Coumaroylquinic acid*	Ursolic acid	5-O-p-Coumaroylquinic acid O-glucoside	Casticin (5,3'-Dihydroxy-3,6,7,4'-Tetramethoxyflavone)	5-Glucosyloxy-2-Hydroxybenzoic Acid methyl ester	Obacunone
Prunetin (5,4'-Dihydroxy-7-methoxyisoflavone)	3',5,5',7-Tetrahydroxyflavanone-7-O-glucoside	4-O-Sinapoylquinic acid	5-O-p-Coumaroylquinic acid*	Isoquercitrin	Feruloylsinapoyltartaric acid	Isofraxidin-7-O-glucoside	2,4,6-trihydroxy-acetophenone-6-O-b-D-glucopyranoside	Isotamarixin*
Luteolin (5,7,3',4'-Tetrahydroxyflavone)	Sudachinoid A	Aromadendrin-7-O-glucoside	1-O-Caffeoyl-β-D-glucose	Hesperetin-7-O-glucoside*		Naringenin-6-C-Glucoside	Bartsioside	Pedaliin
Sakuranetin	Pinocembrin-7-O-neohesperidoside*	6-C-Glucosyl-2-Hydroxynaringenin	Vanillic Acid-4-O-Glucuronide	Nepetin-7-O-glucoside		Isohemiphloin	3,4,5-Trimethoxyphenyl-1-O-Glucoside	Quercetin-3-O-(4''-O-glucosyl)rhamnoside
Eriodictyol (5,7,3',4'-Tetrahydroxyflavanone)	Pinocembrin-7-O-rutinoside*	Limonin	Syringaldehyde-4-O-glucoside	Myricetin-3-O-galactoside		6-Hydroxykaempferol-7-O-glucoside	Koaburaside
2-Hydroxy-2,3-dihydrogenistein	Naringenin-7-O-Neohesperidoside(Naringin)*	Obacunoic acid	Dihydrocaffeoylglucose	6'-O-Glucosylaucubin		11-O-Galloylbergenin	O-Feruloyl 4-hydroxycoumarin
2-hydroxynaringenin	Naringenin-7-O-Rutinoside(Narirutin)*	Deacetylnomilin	Cryptochlorogenic acid (4-O-caffeoylquinic acid)*	Kaempferol-3-O-(6''-malonyl)glucoside		Quercetin-3-O-(2''-O-galactosyl)glucoside	2,4,2',4'-tetrahydroxy-3'-prenylchalcone
Dihydrobungeanool	Kaempferol-3-O-(6''-p-Coumaroyl)glucoside (Tiliroside)*	Isoobacunoic acid	Neochlorogenic acid (5-O-caffeoylquinic acid)*	Luteolin-7-O-neohesperidoside (Lonicerin)*			1-O-Feruloyl-β-D-glucose
Aegeline	Luteolin-7-O-(6''-caffeoyl)rhamnoside	6-Methoxykaempferol-3-O-glucoside	Chlorogenic acid (3-O-caffeoylquinic acid)*	Kaempferol-3-O-rutinoside(Nicotiflorin)*			Glucosyringic acid
Apigenin-7,4'-dimethyl ether	Kaempferol-3-O-(6''-p-Coumaroyl)galactoside*	Evodol	Ferulic acid-4-O-glucoside	Gallocatechin-(4α→8)-gallocatechin			7-Deoxyloganic acid
Auraptene	Poncirin (Isosakuranetin-7-O-neohesperidoside)	Chestnutlignansoide	1-O-Feruloylquinic acid*	Hesperetin-7-O-neohesperidoside(Neohesperidin)*			1-O-Glucosyl sinapate
Hispidulin (5,7,4'-Trihydroxy-6-methoxyflavone)	Didymin	Nomilin	3-O-Feruloylquinic acid*	Hesperetin-7-O-rutinoside (Hesperidin)*			1-O-Sinapoyl-D-glucose*
5,7,2'-Trhiyroxy-8-methoxyflavone	"Eriodictyol-7-O-(6""-O-p-coumaroyl)glucoside"	Nomilinic acid	D-Threo-guaiacylglycerol-7-O-β-D-glucoside	Tamarixetin-3-O-rutinoside*			Roseoside
Diosmetin (5,7,3'-Trihydroxy-4'-methoxyflavone)	Eriodictyol-7-O-Rutinoside (Eriocitrin)	syringaresinol-4'-O-glucoside	Naringenin-4'-O-glucoside*	Myricetin-3-O-rutinoside			1-O-p-Hydroxycinnamoyl-3-O-caffeoylglycerol
Chrysoeriol	Neoeriocitrin	Naringenin-7-O-Rutinoside-4'-O-glucoside	Naringenin-7-O-glucoside (Prunin)*	Kaempferol-3-O-rutinoside-7-O-rhamnoside			Glycohaplopine
6-methyl Luteolin	Citrusin I	Rhamnetin-3-O-Rutinoside-5-O-rhamnoside*	6-O-Caffeoylarbutin	Kaempferol-3-O-rutinoside-7-O-glucoside*			Ditartaroyl-hydroxycoumarin
Gnetifolin B		Isorhamnetin-3-O-rutinoside-7-O-rhamnoside*	Butin-7-O-glucoside	Kaempferol-3-O-neohesperidoside-7-O-glucoside*			Bis(p-Coumaroyl)tartaric acid
Rhamnocitrin (7-Methylkaempferol)		Echinacoside	Isosalipurposide (Phlorizin Chalcone)				Taxifolin-3-O-rhamnoside (Astilbin)
Citpressine I			Dihydrocharcone-4'-O-glucoside				Caffeoyl-p-coumaroyltartaric acid
Hesperetin			Epicatechin-4'-O-β-D-glucopyranoside*				Isorhamnetin-3-O-rhamnoside
5,7,4'-Trimethoxyflavone			Epicatechin-6-C-β-D-glucopyranoside				5-O-p-Coumaroylshikimic acid O-glucoside
3’,4’-Dihydroxy-7,5’-dimethoxyflavone			Quercetin-7-O-glucoside*				Deacetylnomilinic acid
Kumatakenin			3-Hydroxy-4-isopropylbenzylalcohol-3-O-sophoroside				Kaempferol-3-O-(2''-O-acetyl)glucuronide
Mandelic acid-β-glucoside			1-O-Caffeoyl-(6-O-glucosyl)-β-D-glucose				6'-O-Feruloyl-D-sucrose
Azaleatin (5-O-Methylquercetin)			Isochlorogenic acid A*				Naringenin-7-O-(6''-malonyl)glucoside
Nepetin (5,7,3',4'-Tetrahydroxy-6-methoxyflavone)			Isochlorogenic acid B*				Pinoresinol-4-O-glucoside
Rhamnetin			1,3-Dicaffeoylquinic acid				Rosmarinic acid-3'-O-glucoside
4',6-Dihydroxy-5,7-dimethoxyflavanone			4,5-Dicaffeoylquinic acid*				lariciresinol-4'-O-glucoside
Trans-5-O-(p-Coumaroyl)shikimate			4,5-O-Dicaffeoylquinic acid Methyl Ester*				Secoisolariciresinol 4-O-glucoside
p-Coumaric acid-4-O-glucoside			3-O-Feruloylquinic acid-O-glucoside*				Tricetin-5-O-(6''-malonyl)glucoside
Phenylpropionic acid-O-β-D-glucopyranoside			5-O-Feruloyl quinic acid glucoside*				Hesperetin-7-O-(6''-malonyl)glucoside
1-O-p-Coumaroyl-β-D-glucose			3,4-Di-O-caffeoylquinic acid methyl ester*				5'-Methoxyisolariciresinol-9'-O-glucoside
Salvigenin			6'-O-Sinapoylsucrose				syringaresinol-4'-O-(6''-acetyl)glucoside
3-Hydroxy-5,7,8-trimethoxyflavone*			Furanofructosyl-α-D-(6-mustard acyl)glucoside*				Rhamnazin 3-Glucosyl-Arabinofuranoside
5-Hydroxy-7,3’,4’-trimethoxyflavone*			Furanofructosyl-α-D-(3-mustard acyl)glucoside*				Methylhesperidin
Cirsiliol (3',4',5-Trihydroxy-6,7-Dimethoxyflavone)			Quercetin-3-O-neohesperidoside*				Hesperidin methylchalcone
Rehderianin I			Quercetin-7-O-rutinoside-4'-O-glucoside*				Vitexin-7-O-rutinoside
Jaceosidin							Oleanolic acid-3-O-xylosyl(1→3)glucuronide
7-Hydroxy-2',5,8-Trimethoxyflavanone							kaempferol-3-caffeoyldiglucoside
6-Demethoxytangeretin
coniferyl alcohol-4-O-glucoside (Coniferin)
7,8-Dihydroxy-5,6,4'-trimethoxyflavone
Tenaxin I
Eupatilin (5,7-Dihydroxy-3',4',6-Trimethoxyflavone)*
Eupatorin*
Cirsilineol (4',5-Dihydroxy-3',6,7-trimethoxyflavone)
Penduletin (5,4'-Dihydroxy-3,6,7-trimethoxyflavone)
5,6,7,4'-Tetramethoxyflavanone
Syringetin
Limocitrin (5,7,4'-trihydroxy-8,3'-dimethoxyflavonol)
3,3',5,7-Tetrahydroxy-4',6-Dimethoxyflavone; (Laciniatin)
3',5-Dihydroxy-4',6,7-Trimethoxyflavanone
5,7-Dihydroxy-2',3',4'-trimethoxydihydroisoflavone
Honyumine
Buntanine
Gardenin B
5-Hydroxy-3,7,3',4'-tetramethoxyflavone (Retusin)
Eupatorin-5-methylether (3'-hydroxy-5,6,7,4'-tetramethoxyflavone)
Chrysosplenol D
Sudachitin
5-Hydroxy-6,7,3',4'-tetramethoxyflavanone
N-Sinapoylhydroxycoumarin
Sinensetin (5,6,7,3',4'-pentamethoxyflavone)*
3',4',5',5,7-Pentamethoxyflavone
Isosinensetin
Tangeretin (4',5,6,7,8-Pentamethoxyflavone)*
Feruloyl syringic acid
Chrysosplenol G
5,7-Dihydroxy-6,3',4',5'-tetramethoxyflavone (Arteanoflavone)
Uralenol
Gardenin D
Swertiamarin
2'-Hydroxy-3,4,5,4',6'-pentamethoxychalcone
5,7,8,3’,4’-Pentamethoxyflavanone
5-Hydroxyauranetin
ethyl rosmarinate
Demethylnobiletin
Gardenin E
Pregomisin
Nobiletin (5,6,7,8,3',4'-Hexamethoxyflavone)
Gardenin C
5,6,7,8,3',4'-Hexamethoxyflavanone
Gardenin A
Natsudaidain (3-Hydroxy-3',4',5,6,7,8-hexamethoxyflavone)
Isovitexin
Apigenin-8-C-Glucoside (vitexin)*
Apigenin-6-C-glucoside (Isovitexin)
Genistein-8-C-glucoside
Apigenin-7-O-glucoside(Cosmosiin)
3,5,6,7,8,3',4'-Heptamethoxyflavone
Avicularin
Quercetin-3-O-xyloside (Reynoutrin)
Acacetin-7-O-galactoside
Isorhamnetin-3-O-arabinoside
Luteolin-8-C-glucoside (orientin)*
Kaempferol-7-O-glucoside
Luteolin-6-C-glucoside (Isoorientin)*
Eriodictyol-8-C-glucoside
6-C-MethylKaempferol-3-glucoside
Chrysoeriol-8-C-glucoside (scoparin)
Diosmetin-6-C-glucoside
Chrysoeriol-7-O-glucoside
Yuanhuanin
Hispidulin-8-C-glucoside
6-HydroxyLuteolin 5-glucoside
Quercetin-3-O-glucoside (Isoquercitrin)*
Quercetin-3-O-galactoside (Hyperin)*
Hesperetin-5-O-glucoside*
10-Formyltetrahydrofuran
Dihydroxy-dimethoxyflavone-7-O-glucoside
5,2'-Dihydroxy-7,8-dimethoxyflavone glycosides
Cirsimaritin-8-C-glucoside
Pectolinarigenin-7-O-glucoside
Rhamnetin-3-O-Glucoside*
Isorhamnetin-7-O-glucoside (Brassicin)*
Isorhamnetin-3-O-Glucoside*
3'-O-Methyltricetin-7-O-glucoside
Tamarixetin-3-O-glucoside (Tamarixin)*
Limocitrin-3-O-arabinoside
Hesperetin-3'-O-glucuronide
Rutaevin
Kaempferol-3-O-(6''-acetyl)glucoside
Eriodictyol-7-O-(6''-acetyl)glucoside
tricin-7-O-Glucoside
Cirsiliol-8-C-glucoside
Dicaffeoylshikimic acid
Chrysoeriol-7-O-(6''-acetyl)glucoside
Quercetin-3-O-(6''-acetyl)galactoside
Eupatilin-7-O-glucoside
Limocitrin-3-O-glucoside
Syringetin-7-O-glucoside
5,6,3′,4′-Tetrahydroxy-3,7-dimethoxyflavone-6-O-glucoside
Laricitrin-3-O-(6''-acetyl)glucoside
5,4'-Dihydroxy-3,6,7,3'-tetramethoxyflavone-4'-O-glucoside
Chrysoeriol-7-O-(6''-malonyl)glucoside
Diosmetin-7-O-(6''-malonyl)glucoside
Limocitrin-7-O-(6''-Acetyl)glucoside
Isorhamnetin-3-O-(6''-malonylglucoside)
3'-O-Methyltricetin-7-O-(6''-malonyl)glucoside
Tamarixetin-3-O-(6''-malonyl)glucoside
"vitexin-2""-O-xyloside*"
Hispidulin-8-C-(2''-O-xylosyl)xyloside
Apigenin-8-C-(2''-xylosyl)glucoside*
Isovitexin-2''xyloside*
Isovitexin-8-O-xylcoside*
Apigenin-6-C-(2''-xylosyl)glucoside*
Tricin-7-O-(6''-O-malonyl)glucoside
Apigenin-6-C-(2''-glucuronyl)xyloside
Apigenin-7-O-(6''-p-Coumaryl)glucoside
Genistein-7-O-galactoside-rhamnose
Apigenin-7-O-rutinoside (Isorhoifolin)*
Apigenin-7-O-neohesperidoside (Rhoifolin)*
Isovitexin-2''-O-rhamnoside*
vitexin-2''-O-rhamnoside*
orientin-2''-O-xyloside*
Luteolin-6-C-arabinoside-7-O-glucoside
orientin-7-O-arabinoside*
Acacetin-7-O-rutinoside (Linarin)
Robinson-7-O-Neohesperidin
vitexin-2''-O-glucoside*
Luteolin-6-C-rhamnoside-7-O-glucoside
Hispidulin-8-C-(2''-O-xylosyl)glucoside
Apigenin-6,8-di-C-glucoside (Vicenin-2)
Kaempferol-3-O-neohesperidoside*
Luteolin-7-O-rutinoside*
Isovitexin-7-O-glucoside(Saponarin)*
Diosmetin-8-C-(2''-O-arabinosyl)glucoside
Diosmetin-8-C-(2''-O-rhamnosyl)glucoside
Chrysoeriol-7-O-rutinoside
Diosmetin-7-O-Neohesperidoside (Neodiosmin)
Hispidulin-7-O-(6''-O-p-Coumaroyl)Glucoside
Kaempferol-3,7-di-O-glucoside
Quercetin-3-O-rutinoside (Rutin)*
orientin-2''-O-galactoside*
orientin-7-O-glucoside*
Quercetin-3-O-(2''-O-rhamnosyl)galactoside
IsoLuteolin-6,8-di-C-glucoside
Luteolin-7,3'-di-O-glucoside
Kaempferol-6,8-di-C-glucoside
Luteolin-6-C-(2''-glucuronyl)glucoside
Nitensoside B
Chrysoeriol-5,7-di-O-glucoside
Tamarixetin-3-O-glucoside-7-O-rhamnoside*
Isorhamnetin-3-O-glucoside-7-O-rhamnoside*
6-C-Methylquercetin-3-O-rutinoside
Hispidulin-8-C-(2''-O-glucosyl)glucoside
Chrysoeriol-6,8-di-C-glucoside
Isorhamnetin-3-O-neohespeidoside*
Chrysoeriol-6-C-glucoside-4'-O-glucoside*
6-Hydroxykaempferol-3,6-O-Diglucoside
Meratin
6-Hydroxykaempferol-7,6-O-Diglucoside
Quercetin3,7-diglucoside
Hesperetin-8-C-glucoside-3'-O-glucoside
Viscumneoside IV(Rhamnazin-3-O-(6''-hydroxymethylglutaryl)glucoside)
Chrysoeriol-7-O-(6''-feruloyl)glucoside
Tricin-7-O-rutinoside*
Tricin-7-O-neohesperidoside*
Isorhamnetin-3,7-O-diglucoside
Patuletin-3-O-rutinoside
Limocitrin-3-O-(3-hydroxy-3-methylglutarate)glucoside
tricin-7-O-(2''-O-glucosyl)glucoside
Syringetin-3-O-rutinoside
Tricin-4'-O-(syringyl alcohol)ether-5-O-glucoside
Sudachiin B
Sudachiin C
Limocitrin-3,7-di-O-glucoside
3,3',5,7-Tetrahydroxy-4',6-Dimethoxyflavone-7-O-Gentiobioside; (Laciniatin-7-O-Gentiobioside)
Natsudaidain-3-O-(3-hydroxy-3-methylglutarate)glucoside
Luteolin-7-O-(2''-O-rhamnosyl)rutinoside
Apigenin-8-C-glucoside-7-O-Sophoroside
Isoorientin-7-O-(2''-rhamnosyl)glucoside
Quercetin-3-O-rutinoside-7-O-rhamnoside*
Quercetin-3-O-(2''-O-Rhamnosyl)rutinoside*
Isovitexin-7-O-(6''-feruloyl)glucoside
6-Hydroxykaempferol-3-O-rutin-6-O-glucoside
Quercetin-3-O-rutinoside-7-O-glucoside*
Kaempferol-6,8-di-C-glucoside-7-O-glucoside
Chrysoeriol-6,8-di-C-glucoside-4'-O-glucoside
Natsudaidain-3-O-(5'-glucosyl-3-hydroxy-3-methylglutarate)glucoside
