# Supplementary material for: Metabolome and Transcriptome Analysis Revealed the Basis of the Difference in Antioxidant Capacity in Different Tissues of Citrus reticulata ‘Ponkan’
Source: Antioxidants (Basel). 2024 Feb 18;13(2):243. doi: 10.3390/antiox13020243 (PMC10886001; doi:10.3390/antiox13020243)
Supplement: Supplementary file 1 [file antioxidants-13-00243-s001.zip › Table S3-proof.xlsx]

## Sheet: Sheet1
Table S3. List of the accessions of the genes involved in Figure 3C.
Gene	Accession
PAL-1	Ciclev10011134m
PAL-2	Ciclev10011175m
C4H-1	Ciclev10008125m
C4H-2	Ciclev10000921m
4CL-1	Ciclev10019532m
4CL-2	Ciclev10025280m
4CL-3	Ciclev10007733m
C3H-1	Ciclev10011520m
C3H-2	Ciclev10000848m
CHS-1	Ciclev10005133m
CHS-2	Ciclev10015535m
CHS-3	Ciclev10001405m
CHI-1	Ciclev10032697m
CHI-2	Ciclev10032749m
FNS-1	Ciclev10019810m
FNS-2	Ciclev10019811m
F3H	Ciclev10025931m
FLS	Ciclev10026028m
F3'H	Ciclev10019637m
F6/8H-1	Ciclev10000852m
F6/8H-2	Ciclev10001118m
F6/8H-3	Ciclev10001614m
OMT-1	Ciclev10026344m
OMT-2	Ciclev10020814m
OMT-3	Ciclev10031952m
OMT-4	Ciclev10015724m
OMT-5	Ciclev10029158m
C2'H-1	Ciclev10018343m
C2'H-2	Ciclev10007156m
C2'H-3	Ciclev10029948m
PT-1	Ciclev10008336m
PT-2	Ciclev10033551m
MS-1	Ciclev10030448m
MS-2	Ciclev10008095m
