# Supplementary material for: Metabolome and Transcriptome Analysis Revealed the Basis of the Difference in Antioxidant Capacity in Different Tissues of Citrus reticulata ‘Ponkan’
Source: Antioxidants (Basel). 2024 Feb 18;13(2):243. doi: 10.3390/antiox13020243 (PMC10886001; doi:10.3390/antiox13020243)
Supplement: Supplementary file 1 [file antioxidants-13-00243-s001.zip › Table S4-proof.xlsx]

## Sheet: Sheet1
Table S4. List of the accessions and annotations of the hub genes and co-expressed transcription factors in Figure S8.
ID	Type	Degree	Annotation
Ciclev10026241m	hub_gene	15	FLS
Ciclev10013655m	hub_gene	15	OMT
Ciclev10013676m	hub_gene	8	OMT
Ciclev10032697m	hub_gene	8	CHI
Ciclev10000844m	hub_gene	2	F6/8H
Ciclev10028646m	hub_gene	16	FLS
Ciclev10030328m	hub_gene	3	UGT
Ciclev10001533m	tf_gene	1	C2C2-GATA
Ciclev10002020m	tf_gene	2	Jumonji
Ciclev10005144m	tf_gene	2	NF-YA
Ciclev10005465m	tf_gene	1	NAC
Ciclev10005891m	tf_gene	2	AP2/ERF-ERF
Ciclev10007737m	tf_gene	2	CPP
Ciclev10007837m	tf_gene	1	C2H2
Ciclev10007937m	tf_gene	2	bHLH
Ciclev10008308m	tf_gene	1	Others
Ciclev10008813m	tf_gene	1	C2C2-CO-like
Ciclev10008943m	tf_gene	1	C2C2-GATA
Ciclev10009004m	tf_gene	2	C2C2-GATA
Ciclev10009761m	tf_gene	1	WRKY
Ciclev10010607m	tf_gene	1	GNAT
Ciclev10011285m	tf_gene	1	AP2/ERF-ERF
Ciclev10011982m	tf_gene	1	IWS1
Ciclev10012055m	tf_gene	1	WRKY
Ciclev10012147m	tf_gene	3	mTERF
Ciclev10013781m	tf_gene	1	WRKY
Ciclev10014617m	tf_gene	2	EIL
Ciclev10015049m	tf_gene	2	WRKY
Ciclev10015087m	tf_gene	1	SET
Ciclev10015173m	tf_gene	1	C2C2-CO-like
Ciclev10015266m	tf_gene	2	GARP-G2-like
Ciclev10015910m	tf_gene	1	BES1
Ciclev10016031m	tf_gene	2	mTERF
Ciclev10016261m	tf_gene	1	bHLH
Ciclev10016466m	tf_gene	1	bHLH
Ciclev10016511m	tf_gene	1	bHLH
Ciclev10016798m	tf_gene	2	Others
Ciclev10019546m	tf_gene	2	SBP
Ciclev10020440m	tf_gene	1	C2C2-CO-like
Ciclev10021287m	tf_gene	1	HSF
Ciclev10022033m	tf_gene	1	GRF
Ciclev10022641m	tf_gene	1	NF-YB
Ciclev10024310m	tf_gene	1	HB-HD-ZIP
Ciclev10025950m	tf_gene	2	MYB-related
Ciclev10029007m	tf_gene	2	NAC
Ciclev10029545m	tf_gene	2	SWI/SNF-BAF60b
Ciclev10031325m	tf_gene	3	SET
Ciclev10032192m	tf_gene	1	WRKY
Ciclev10032202m	tf_gene	1	GNAT
Ciclev10032203m	tf_gene	1	NAC
Ciclev10032940m	tf_gene	3	C2C2-LSD
novel.704	tf_gene	2	FAR1
