# Supplementary material for: Metabolome and Transcriptome Analysis Revealed the Basis of the Difference in Antioxidant Capacity in Different Tissues of Citrus reticulata ‘Ponkan’
Source: Antioxidants (Basel). 2024 Feb 18;13(2):243. doi: 10.3390/antiox13020243 (PMC10886001; doi:10.3390/antiox13020243)
Supplement: Supplementary file 1 [file antioxidants-13-00243-s001.zip › Table S5-proof.xlsx]

## Sheet: Sheet1
Table S5. List of the accessions and annotations of the hub genes and co-expressed transcription factors in Figure 5A.
ID	Type	Degree	Annotation
Ciclev10011175m	hub_gene	6	PAL
Ciclev10011520m	hub_gene	16	C3H
Ciclev10020814m	hub_gene	19	OMT
Ciclev10025280m	hub_gene	4	4CL
Ciclev10026731m	hub_gene	5	OMT
Ciclev10029158m	hub_gene	10	OMT
Ciclev10001292m	tf_gene	3	GARP-G2-like
Ciclev10016229m	tf_gene	5	WRKY
Ciclev10019749m	tf_gene	4	bHLH
Ciclev10031135m	tf_gene	3	bHLH
Ciclev10032299m	tf_gene	4	mTERF
Ciclev10032575m	tf_gene	1	AP2/ERF-ERF
Ciclev10001251m	tf_gene	2	TUB
Ciclev10001261m	tf_gene	2	TUB
Ciclev10012265m	tf_gene	3	MYB
Ciclev10012360m	tf_gene	2	C3H
Ciclev10014198m	tf_gene	1	B3-ARF
Ciclev10014722m	tf_gene	1	TRAF
Ciclev10016289m	tf_gene	3	bHLH
Ciclev10017867m	tf_gene	2	GARP-G2-like
Ciclev10019518m	tf_gene	1	GNAT
Ciclev10025390m	tf_gene	1	C2H2
Ciclev10026051m	tf_gene	3	C2H2
Ciclev10029167m	tf_gene	1	GeBP
Ciclev10029834m	tf_gene	3	bZIP
Ciclev10001015m	tf_gene	1	Others
Ciclev10002205m	tf_gene	1	bHLH
Ciclev10005701m	tf_gene	1	AP2/ERF-ERF
Ciclev10006914m	tf_gene	1	MYB
Ciclev10010825m	tf_gene	1	GRAS
Ciclev10014454m	tf_gene	2	C3H
Ciclev10015354m	tf_gene	1	BBR-BPC
Ciclev10020863m	tf_gene	1	Trihelix
Ciclev10021624m	tf_gene	1	WRKY
Ciclev10023420m	tf_gene	1	C2H2
Ciclev10026687m	tf_gene	1	AP2/ERF-ERF
Ciclev10031306m	tf_gene	1	AP2/ERF-AP2
Ciclev10032412m	tf_gene	1	bHLH
Ciclev10016846m	tf_gene	1	bHLH
